# Supplementary material for: NR4A1 limits CD8⁺ T Cell effector responses and protection in tuberculosis
Source: Research Square preprint supplement (doi:10.21203/rs.3.rs-8363336/v1), 2026-01-13
Supplement: Supplementary file 1 [file 22f1c98d93fd238c01c697d4.xlsx]

## Sheet: Monky NR4a1 lo vs hi - Fig 6b
gene_name	avg_log2FC	p_val_adj	trend
CCR6	-4.24768	3.82e-176	down
KLRB1	-3.0506	2.67e-155	down
IL7R	-2.35951	1.13e-149	down
GZMH	2.87143	2.23e-149	up
MFHAS1	-2.43577	6.86e-124	down
GZMB	2.15933	9.61e-119	up
ZBTB16	-4.24868	8.56e-115	down
CD69	-2.53695	4.64e-110	down
NFKBIZ	-2.01947	3.58e-109	down
DUSP2	-2.32508	7.79e-91	down
FOSB	-2.50728	1.57e-88	down
LOC102145001	-4.59142	4.55e-86	down
GZMA	4.33149	1.11e-84	up
CSRNP1	-1.955	2.08e-83	down
PDZRN3	-4.16514	3.26e-83	down
EGR1	-3.07481	3.87e-83	down
ZC3H12A	-1.60878	8.3e-82	down
CCL5	1.83412	3.57e-80	up
TNFAIP3	-1.22036	7.54e-78	down
JUN	-2.3088	8.64e-73	down
LOC102125628	-3.28284	2.39e-68	down
HSP90AB1	-1.54326	1.33e-67	down
NR4A1	-2.68437	5.3e-65	down
ARL5B	-1.66916	1.21e-63	down
RRAD	-3.69357	7.92e-63	down
JUNB	-2.10731	7.13e-60	down
DNAJB1	-1.61827	3.04e-59	down
NFKBIA	-1.60001	5.32e-57	down
PPP1R15A	-2.04615	6.08e-57	down
CD83	-2.51294	1.05e-55	down
GNLY	1.52844	6.41e-53	up
PAK3	-3.84138	1.28e-52	down
IKZF2	-2.65472	4.58e-52	down
TNFRSF25	-1.93363	5.09e-52	down
ADRB1	-3.50046	2.68e-50	down
EIF1	-1.04509	9.36e-49	down
EGR2	-2.75507	4.74e-48	down
TSPAN13	-2.64285	1.47e-43	down
BTG2	-1.33803	3.51e-42	down
KLRG1	-1.42978	1.49e-41	down
BLK	-5.54045	5.81e-41	down
PTPN13	-3.64847	2.59e-40	down
MYC	-2.20991	5.16e-40	down
HSP90AA1	-1.10217	1.87e-39	down
RGS2	-2.03864	2.28e-39	down
ANKRD6	-3.25466	5.86e-39	down
ZNF331	-1.37374	8.12e-38	down
RORA	-1.03327	8.29e-37	down
LOC102115168	-1.95311	3.06e-36	down
IER2	-1.53442	3.37e-36	down
GZMK	1.18392	1.03e-35	up
LOC107129205	-2.58073	1.19e-35	down
DNAJA1	-1.44037	3.83e-35	down
KDM6B	-1.70118	7.33e-35	down
GLT1D1	-3.46538	8.65e-35	down
KLRF1	-1.61189	9.84e-35	down
LOC102136945	-4.98013	2.26e-34	down
ZFP36L2	-0.910188	6.77e-34	down
NR4A3	-1.35872	3.17e-33	down
CHD7	-1.80603	5.1e-32	down
MED12L	-4.54667	3.78e-31	down
ZDBF2	-1.66941	7.09e-31	down
PTGER4	-1.18197	1.87e-30	down
IER5	-1.33567	2.48e-30	down
CXCR4	-0.733378	6.79e-30	down
SLC4A10	-2.47451	7.93e-30	down
ENTPD1	2.30147	4.05e-29	up
TRAF1	-1.71245	5.67e-29	down
TNF	-2.4647	7.93e-29	down
PDE4B	-1.09596	1.31e-28	down
ITGB2	1.05094	1.47e-28	up
KLF10	-1.88243	3.6e-28	down
DPP4	-1.25152	4.5e-27	down
ZFP36	-1.74978	7.15e-27	down
TMEM88	-3.03747	1.13e-26	down
EGR3	-3.5921	5.18e-26	down
SPOCK2	-0.980661	9.88e-26	down
UBC	-0.800765	1.08e-25	down
UBE2S	-1.61729	3.18e-25	down
CCR5	1.17616	3.86e-25	up
CD8B	1.01471	4.33e-25	up
KIAA1217	-2.31331	6.24e-25	down
TUBA4A	-1.12243	8.31e-25	down
PER1	-1.20519	2.5e-24	down
DDX5	-0.788715	2.9e-24	down
COTL1	1.27781	4.15e-24	up
AKT3	-1.57815	4.64e-24	down
ARHGAP21	-1.80931	1.86e-23	down
CREM	-0.882668	9.38e-23	down
UBB	-0.769551	9.85e-23	down
COL5A1	-5.80334	1.07e-22	down
SERTAD1	-1.14172	1.61e-22	down
ERRFI1	-1.81106	1.63e-22	down
PLXNC1	-1.79179	3.62e-22	down
ATF4	-0.829768	4.49e-22	down
SKIL	-0.967954	1.06e-21	down
NR1D1	-3.16424	1.29e-21	down
SLC2A3	-0.887292	3.82e-21	down
CERK	-1.70745	4.87e-21	down
CD2	0.97148	5.44e-21	up
ARPC2	0.906998	6.35e-21	up
FYB	0.709174	7.3e-21	up
CCL20	-3.72023	2.47e-20	down
RGCC	-0.885447	3.56e-20	down
NR4A2	-0.676453	6.03e-20	down
CCR2	1.76768	8.49e-20	up
HEG1	-1.22948	8.68e-20	down
KLRC1	-1.80148	1.05e-19	down
ZFAND5	-1.04082	2.71e-19	down
GADD45B	-1.64419	4.61e-19	down
HSPA8	-0.678341	5.6e-19	down
SQSTM1	-1.46617	1.33e-18	down
BHLHE40	-0.816352	1.41e-18	down
JUND	-0.804696	1.43e-18	down
CD52	0.606199	3.85e-18	up
COL5A3	-1.61846	4.29e-18	down
RORC	-3.1451	2.38e-17	down
GIMAP7	0.940277	6.15e-17	up
TCF7	-1.00317	1.11e-16	down
CORO1A	0.508277	1.66e-16	up
CDKN1A	-2.01424	2.94e-16	down
PPP2R2B	-1.10001	3.22e-16	down
TMSB4X	0.74457	4.05e-16	up
CAP1	0.826946	4.14e-16	up
LOC102140002	0.81817	5.53e-16	up
LOC107126456	-1.06246	7.09e-16	down
MICAL2	-1.29511	7.99e-16	down
ITGB7	1.12816	9.53e-16	up
GPR183	-0.918009	1.24e-15	down
LOC102128672	-0.683989	1.5e-15	down
FLNA	0.896619	1.59e-15	up
SELPLG	1.31933	1.96e-15	up
TIGIT	1.24739	2.55e-15	up
C5H4orf26	-3.52533	3.25e-15	down
CCDC71L	-1.80963	1.08e-14	down
ID2	-0.723842	1.77e-14	down
GIMAP4	1.53602	2.26e-14	up
CAMK4	-0.763905	4.05e-14	down
SIPA1L2	-1.27428	5.24e-14	down
LOC102116897	1.04389	5.25e-14	up
PSMB8	1.20234	5.47e-14	up
ACTR3	0.93761	6e-14	up
ITM2C	0.888566	7.51e-14	up
NR1D2	-0.968504	9.12e-14	down
C1QTNF1	-2.21734	1.14e-13	down
FAM43A	-1.46164	1.76e-13	down
LOC107129304	-3.78192	1.82e-13	down
ANXA2	1.01524	2.05e-13	up
RYBP	-0.814797	2.25e-13	down
IFRD1	-1.45358	2.74e-13	down
KIF5C	-3.81084	3.08e-13	down
MATN2	-2.94847	3.2e-13	down
DUSP1	-2.10262	3.59e-13	down
NKG7	0.692055	4.48e-13	up
HSPA5	-0.682434	4.84e-13	down
SMOX	-1.44253	5.02e-13	down
JAML	-0.999112	5.67e-13	down
DNAJA4	-1.39609	6.65e-13	down
SIK1	-0.797418	7.92e-13	down
KIFC1	-1.49593	8.05e-13	down
THEM6	-3.14731	9.13e-13	down
METRNL	1.34043	1.26e-12	up
CAPZB	0.803882	1.29e-12	up
TMSB10	1.16829	1.44e-12	up
SH3BGRL3	0.502188	1.48e-12	up
ARHGDIB	0.526394	1.73e-12	up
IFI27	1.58859	2.72e-12	up
GMFG	0.737674	2.97e-12	up
TMEM132C	-8.16148	3.3e-12	down
NCR3	-0.969325	3.75e-12	down
ZNF165	-2.08536	3.91e-12	down
THY1	-1.37563	4e-12	down
ZBTB38	0.901368	7.14e-12	up
ADAM12	-1.36779	8.34e-12	down
CD48	0.582178	8.98e-12	up
PERP	-1.17831	1e-11	down
TRIM39	-1.00444	1.07e-11	down
TMIGD2	-3.50662	1.32e-11	down
SUN2	0.741589	1.48e-11	up
ZNF618	-1.59522	1.64e-11	down
CD3G	0.581393	2.06e-11	up
LY6E	0.757552	2.15e-11	up
TNFRSF10D	-1.35355	2.23e-11	down
LOC102133263	0.63445	2.23e-11	up
ZBTB10	-1.6451	2.55e-11	down
SLC15A4	-1.28638	2.78e-11	down
KCNK5	-1.53291	2.87e-11	down
ITGB1	0.77452	3.18e-11	up
USP36	-0.882966	3.18e-11	down
MYLIP	-0.785315	3.46e-11	down
RBBP6	-0.774816	3.72e-11	down
CD3D	0.378669	4.28e-11	up
LOC102124370	-1.08343	4.65e-11	down
GIMAP6	0.742861	5.25e-11	up
CMA1	2.66162	5.27e-11	up
IFI27L2	0.961262	5.52e-11	up
NCK2	-1.19692	5.54e-11	down
SLAMF7	0.945811	6.36e-11	up
IFFO2	-1.12348	7.24e-11	down
PCF11	-0.889101	7.7e-11	down
GPR65	-0.78178	1.22e-10	down
WSB1	-0.825493	1.25e-10	down
GNPNAT1	-1.3902	1.49e-10	down
IKZF3	1.33494	2.1e-10	up
SRSF6	-0.690807	2.11e-10	down
IL17RE	-5.17935	2.13e-10	down
HSPH1	-0.662783	2.17e-10	down
LOC102114865	0.501227	2.19e-10	up
LOC102138395	1.30088	2.3e-10	up
LRIG1	-0.731301	2.69e-10	down
CPE	-2.46178	2.91e-10	down
LOC102121775	0.913841	3.85e-10	up
MYH9	0.527417	3.87e-10	up
NCALD	-1.71359	4.35e-10	down
ABHD15	-1.51087	4.36e-10	down
SLC41A1	-1.62074	4.63e-10	down
IDH2	0.689042	5.68e-10	up
KIAA0355	-1.46769	6.18e-10	down
ADAM23	-1.17264	6.98e-10	down
FOS	-1.3632	8.66e-10	down
DNAJB4	-1.85327	9.49e-10	down
TP53I13	-1.01976	1.04e-09	down
PDE4D	0.499155	1.78e-09	up
ATPIF1	1.11242	1.84e-09	up
MAFF	-3.02881	2.6e-09	down
PTMS	1.14975	2.66e-09	up
PPP2R2C	-3.34014	2.93e-09	down
CRIM1	-1.30901	2.94e-09	down
GNL3	-1.11839	3.25e-09	down
C9H10orf128	-2.07692	3.31e-09	down
CAPZA1	0.921955	3.4e-09	up
LOC101925240	-1.54425	3.44e-09	down
ELL2	-1.33642	3.44e-09	down
SLFN5	0.793684	3.97e-09	up
VOPP1	0.707966	5.06e-09	up
ANXA1	0.661619	5.27e-09	up
LOC102139976	4.07472	5.55e-09	up
TUBB4B	-0.709956	5.64e-09	down
LOC102116906	-0.595919	6.1e-09	down
CALCOCO2	0.998441	6.6e-09	up
PTCH1	-2.39719	7.11e-09	down
BRD2	-0.545666	7.9e-09	down
RPS6KA3	-0.6648	8.35e-09	down
MLLT6	-0.61571	9.16e-09	down
LASP1	0.816133	9.31e-09	up
ATP5E	0.902336	1.21e-08	up
RPLP0	-0.506623	1.59e-08	down
EFNB2	-1.71839	1.61e-08	down
AP2M1	1.12835	1.7e-08	up
SEMA4D	0.435288	1.79e-08	up
REL	-0.801406	1.85e-08	down
CD96	-0.85495	1.98e-08	down
CLIC1	1.25306	2.25e-08	up
RUNX2	-1.26245	2.33e-08	down
PSMB9	0.737521	2.34e-08	up
ITM2A	1.01897	2.63e-08	up
HAVCR2	3.70458	3.12e-08	up
DOCK5	3.39708	3.35e-08	up
EID1	0.876027	3.5e-08	up
CD226	0.917953	3.68e-08	up
ICAM4	-2.95787	4.25e-08	down
C16H17orf96	-2.32044	5.72e-08	down
KIAA1551	0.612871	6.11e-08	up
CTSL	-2.18033	6.72e-08	down
CD84	0.695077	6.94e-08	up
PMAIP1	-0.723553	7.99e-08	down
YWHAB	0.499377	8.55e-08	up
MAST4	-1.65273	9.36e-08	down
HUNK	-1.61285	9.73e-08	down
DST	-2.07837	9.83e-08	down
GIMAP8	0.671455	1.13e-07	up
SFMBT2	-0.926859	1.33e-07	down
SLC1A5	-0.961882	1.39e-07	down
DUSP16	-0.956061	1.44e-07	down
DUSP4	1.25948	1.57e-07	up
RPS6KA1	1.03088	1.72e-07	up
PTP4A2	0.706503	1.91e-07	up
METTL21A	-1.07214	2e-07	down
LOC102132314	-0.948036	2.3e-07	down
SNX25	-1.22477	2.41e-07	down
RSRP1	-0.836949	2.46e-07	down
MSN	0.490946	2.51e-07	up
FSD1	-2.13099	3e-07	down
KIAA1683	-4.10491	3.17e-07	down
PPP1R10	-1.07389	3.34e-07	down
PITPNM2	-1.42861	3.55e-07	down
NFKBID	-1.98493	4.09e-07	down
TP53INP2	-1.15352	4.34e-07	down
PSMB4	0.778121	5.09e-07	up
LOC101867429	0.801646	5.16e-07	up
NABP1	-0.885164	5.43e-07	down
AUTS2	-1.68501	5.63e-07	down
KLRD1	1.10579	5.65e-07	up
SOCS1	-1.1958	6.46e-07	down
LOC102143756	0.946533	7.04e-07	up
SATB1	-0.497685	7.83e-07	down
RHBDL2	-3.18063	7.9e-07	down
CST7	0.549765	8.18e-07	up
HNRNPUL2	0.640281	8.53e-07	up
LOC102144213	-3.21627	8.6e-07	down
EGLN3	-1.37682	8.77e-07	down
LOC101926125	0.932585	8.99e-07	up
CYSLTR1	-1.26489	9.08e-07	down
SNX20	1.54767	9.88e-07	up
CX3CR1	3.49014	1.01e-06	up
CD27	0.521709	1.11e-06	up
TJP1	2.54332	1.12e-06	up
PRNP	-0.850838	1.21e-06	down
MEPCE	-0.82226	1.26e-06	down
TGFBR3	-0.515867	1.3e-06	down
ABR	0.970276	1.38e-06	up
EML4	-0.463849	1.49e-06	down
S100A10	1.04564	1.57e-06	up
RHOF	-0.717792	1.58e-06	down
FBXO7	-0.930133	1.66e-06	down
SARAF	-0.586537	1.69e-06	down
LOC107127443	-5.81853	1.83e-06	down
VSTM4	-5.63177	1.83e-06	down
UAP1	-1.39444	1.85e-06	down
LOC102115805	-2.73153	2.04e-06	down
EIF5	-0.726563	2.08e-06	down
NDUFS5	0.809126	2.23e-06	up
PTP4A1	-0.764443	2.4e-06	down
TTC39C	-0.730059	2.41e-06	down
IER3	-3.1973	2.46e-06	down
AFF3	-3.00112	2.57e-06	down
LSP1	0.632452	3.07e-06	up
C2H3orf58	-0.97755	3.24e-06	down
NXF1	-0.959932	4.04e-06	down
SETBP1	1.90434	4.06e-06	up
MAFA-F	0.653577	4.44e-06	up
CTSW	-0.752752	4.74e-06	down
CNTROB	-1.39569	4.78e-06	down
GLUL	1.2394	4.83e-06	up
NPAS2	-4.93258	4.86e-06	down
LST1	-1.4987	4.99e-06	down
CD244	1.33666	5.1e-06	up
SYT11	1.16576	5.12e-06	up
MAT2A	-0.938568	6.19e-06	down
CD28	-0.397775	6.31e-06	down
CD101	2.16016	6.8e-06	up
GIMAP1	0.858677	7.17e-06	up
SETD7	-1.12235	7.95e-06	down
CALM3	0.709638	9.68e-06	up
ISG15	0.815005	1.01e-05	up
LOC102117303	0.93379	1.18e-05	up
FOSL2	-0.460329	1.24e-05	down
ZBP1	1.22244	1.24e-05	up
LOC102137297	0.963367	1.32e-05	up
DGKA	-0.672289	1.34e-05	down
RAB27A	0.549434	1.37e-05	up
RAC2	0.277699	1.39e-05	up
LOC102120885	-1.00155	1.55e-05	down
LOC102132295	-0.774919	1.56e-05	down
ERAP2	-0.522892	1.61e-05	down
STAT4	-0.777164	1.76e-05	down
TIPARP	-0.903596	1.81e-05	down
CD6	-0.397357	2.1e-05	down
DENND2D	0.695072	2.17e-05	up
SRSF5	-0.550869	2.17e-05	down
CHMP2A	1.28787	2.18e-05	up
NASP	-0.737045	2.25e-05	down
CCDC69	0.388706	2.38e-05	up
POLD4	1.3091	2.42e-05	up
OLFM4	-3.26084	2.5e-05	down
TPT1	-0.40508	2.54e-05	down
TSC22D2	-0.816054	2.54e-05	down
ARPC5	0.746994	2.55e-05	up
SLC35E1	-0.68883	2.59e-05	down
ARHGAP8	-7.46211	2.61e-05	down
GOLGA4	-0.522168	2.79e-05	down
C9H10orf35	-1.85951	3.01e-05	down
AKAP13	0.408609	3.02e-05	up
RPS2	-0.69353	3.25e-05	down
AHI1	-1.06074	3.26e-05	down
TRAF3IP3	0.586871	3.35e-05	up
ISG20	0.495563	3.44e-05	up
POLE3	-0.907232	3.61e-05	down
ITGA6	-0.594538	3.62e-05	down
GRASP	-1.90466	3.65e-05	down
TOB1	-0.520038	3.67e-05	down
LOC102116527	0.729501	3.79e-05	up
CDC42SE1	0.612291	3.82e-05	up
TMEM59	0.850525	3.9e-05	up
NDUFB7	1.28197	4.16e-05	up
HIF1A	-0.890259	4.26e-05	down
PRF1	0.501344	4.28e-05	up
ARRB2	0.698703	4.34e-05	up
PSMD4	1.02116	4.34e-05	up
PITPNM1	-0.704807	5.57e-05	down
LOC107127721	-2.21577	5.94e-05	down
LOC102146954	-2.43064	6.2e-05	down
TIMD4	2.89339	6.31e-05	up
LTB	-0.414934	6.52e-05	down
SH3KBP1	0.461862	6.85e-05	up
SPATS2L	-1.66111	6.88e-05	down
TNK1	-2.04783	7.03e-05	down
HMGCS1	-1.08933	7.39e-05	down
KIAA1109	-0.600985	7.41e-05	down
ST3GAL1	0.548766	7.46e-05	up
G3BP2	-0.438247	7.77e-05	down
PDE8A	-1.43047	8.32e-05	down
PRR13	0.818469	8.57e-05	up
NCL	-0.465735	8.58e-05	down
SCMH1	-2.20419	8.85e-05	down
ANXA6	0.495975	0.000107222	up
SERPINB1	1.26233	0.000108678	up
2025-09-11	0.784729	0.000109243	up
DIAPH1	0.421326	0.000114641	up
TDRKH	-2.41265	0.000120343	down
GALNT1	0.682723	0.000123784	up
GNAI2	0.608006	0.000124029	up
LPXN	-0.605692	0.000125115	down
ITGA1	-0.678853	0.000126478	down
PFN1	0.496197	0.000130847	up
SLAMF6	1.37865	0.000139556	up
TRPS1	0.819976	0.000141232	up
GADD45A	-0.742607	0.000142734	down
C11H12orf57	0.711457	0.000144847	up
HMGB1	0.563704	0.000151511	up
UBL5	0.596234	0.000156797	up
ATF3	-3.13507	0.000161973	down
EBPL	2.81694	0.000165216	up
SYNE1	0.64102	0.000172902	up
IL2RB	-0.374884	0.00017444	down
CLEC2D	0.424874	0.000179121	up
GPX4	0.926884	0.000187602	up
LOC102116725	-2.44334	0.000192445	down
CTSS	1.26621	0.00021107	up
RUNX3	0.482795	0.000215856	up
LOC102142222	0.458061	0.000222893	up
MIS12	-0.759128	0.000224228	down
LOC102141626	-0.920726	0.0002244	down
IRF2BPL	-0.827932	0.000229951	down
HSPD1	-0.820905	0.000248241	down
SERINC3	0.756912	0.000261035	up
S100A4	0.455192	0.000301458	up
ATP8B4	3.19315	0.000307197	up
SMAD3	-0.695446	0.000313641	down
ICAM2	-0.692342	0.000338597	down
LOC107129080	-1.20405	0.000345522	down
LOC102124550	0.616412	0.000353801	up
RNF157	0.964134	0.000357796	up
GDE1	1.04476	0.000364652	up
NFKB1	-0.921145	0.000366921	down
ELF1	0.41219	0.00036986	up
SIRT1	-0.782354	0.000371774	down
CCNL1	-0.730759	0.000386362	down
HNRNPA0	-0.499414	0.000390104	down
RBKS	-1.66303	0.000400026	down
SEMA3G	4.62923	0.000406751	up
ATP5L	0.980782	0.00042644	up
DCAF7	0.585472	0.000430336	up
DLL1	-2.5671	0.000437724	down
ADA	0.638973	0.000449129	up
LOC101865130	-0.806653	0.000455288	down
SLAMF1	-0.865775	0.000491889	down
C7H14orf2	0.95019	0.000494248	up
LOC102125623	0.365954	0.000496217	up
RYR2	-2.26854	0.000512304	down
NFKB2	-0.856626	0.000515513	down
PPP1CA	0.731152	0.000526585	up
MKI67	0.944232	0.000530343	up
NOP2	-1.4974	0.000530835	down
TNFRSF1B	0.312004	0.00053994	up
ACTG1	0.423265	0.000610756	up
CCDC50	-0.988922	0.000649776	down
SGPL1	1.07769	0.000672985	up
KIAA0040	0.899599	0.000673891	up
PRKCI	-1.04148	0.000730863	down
C14H11orf58	0.629731	0.000731809	up
ACTB	0.527058	0.000771056	up
ARPC1B	0.493034	0.000821681	up
SPATA13	0.647473	0.00082695	up
LOC101926682	1.73449	0.000901913	up
TP53INP1	2.21754	0.000904368	up
BCAT1	0.679402	0.000906605	up
PLEKHA2	-0.562136	0.000908044	down
CEP19	-1.10076	0.00096499	down
LOC102116519	-1.17455	0.000978223	down
TGFB1	-0.415669	0.00102058	down
ERF	-1.15321	0.00103958	down
IL18RAP	-0.906482	0.00106091	down
SRP14	0.635952	0.00109304	up
IFI6	0.861549	0.00111755	up
AIM2	0.527498	0.00126737	up
DDIT4	-0.632876	0.00130101	down
CCNE1	-1.30984	0.0014114	down
PRMT9	-1.09543	0.00144648	down
FUS	-0.674632	0.0014473	down
SRSF2	-0.738486	0.00147478	down
PSMB7	0.772252	0.00148344	up
STAP1	-1.58007	0.0015635	down
ERN1	-0.740771	0.00173936	down
YPEL5	-0.713185	0.00202959	down
LAG3	0.799492	0.00206847	up
ZDHHC2	-2.29384	0.00207401	down
C20H16orf72	-0.572865	0.00211108	down
DUSP5	-0.444856	0.00213579	down
LOC102124611	0.451223	0.00236256	up
PWWP2B	-2.09111	0.0024525	down
LOC102125197	-0.83226	0.00248364	down
MYL6	0.624091	0.00251953	up
PBXIP1	-0.47077	0.00253759	down
PCED1B	0.846707	0.00278456	up
ATP6V0E1	0.838075	0.00279414	up
CD38	1.26668	0.00286	up
LOC101925857	0.224934	0.00290856	up
ADCY7	0.799897	0.00296323	up
NXPH4	-3.45079	0.00305753	down
LOC102122872	-0.743035	0.00317387	down
DCTN2	0.89911	0.0031933	up
HEXIM1	-0.583087	0.00329358	down
LOC102144128	0.61242	0.00336726	up
SNRPD1	0.79987	0.00348522	up
CFDP1	1.14599	0.0035442	up
RELT	-1.11694	0.00361065	down
CTDSP1	0.785888	0.00372946	up
VCP	0.606326	0.00381268	up
SNX18	0.811501	0.00383921	up
SLC36A4	-1.44508	0.00396611	down
CHD4	-0.713822	0.00397386	down
MED26	-0.772477	0.00402881	down
INTS6	-1.03058	0.00404014	down
MAP2K2	0.532091	0.00412511	up
SEL1L3	-1.12101	0.00417857	down
PIM3	-1.30044	0.00424173	down
KDM5B	-1.32584	0.00424623	down
TFRC	-0.52971	0.00495996	down
RNPEPL1	0.54945	0.00502429	up
BACH2	-1.72111	0.00508301	down
UBXN4	0.569784	0.00508689	up
SLC27A2	1.18348	0.00509826	up
PDE4A	-1.04078	0.00516701	down
PPP3CA	0.637185	0.00572239	up
IRAK2	-1.11277	0.00575302	down
CERS6	1.15935	0.00580446	up
NDUFA13	0.98846	0.00582189	up
BLOC1S1	1.17826	0.00584763	up
PRKCB	0.465449	0.0059287	up
ARL4C	-0.484127	0.0060869	down
NDUFB1	1.22124	0.00630268	up
POM121C	0.749121	0.00643018	up
LOC102136305	-1.39242	0.0065139	down
CCSER2	-0.613101	0.00652771	down
ARNTL2	-1.07713	0.00661356	down
GLRX	1.06059	0.00675315	up
LOC102116023	-0.867328	0.00688203	down
FAM53C	-0.691672	0.0069076	down
DSCAML1	-3.66349	0.00704	down
ATP6	-0.59577	0.00714733	down
CXXC5	-1.69568	0.00717776	down
DMAP1	1.29439	0.00717913	up
STON1	-4.31088	0.00732163	down
BLOC1S2	0.946532	0.00742611	up
TBC1D10C	0.402104	0.00750414	up
ZNF395	-0.638117	0.00768916	down
POLR2F	0.780518	0.00778915	up
ID3	-1.74303	0.00811526	down
TXNL4A	0.623489	0.00834816	up
GNB2	0.77012	0.00837339	up
PTTG1IP	0.690202	0.00842391	up
TNFRSF14	0.988398	0.00850048	up
SLK	0.601763	0.00851531	up
GCNT1	1.87974	0.00883888	up
MLLT4	-1.80686	0.00894621	down
CCNG2	-0.836205	0.00905053	down
SMIM7	0.926264	0.00928894	up
NEMP1	-0.865777	0.0098247	down
CCDC142	0.75732	0.0100087	up
GALNT4	-1.01805	0.0108638	down
TPI1	0.552944	0.011126	up
CCNYL1	-2.04005	0.0113002	down
CNN2	0.422543	0.0123345	up
HACD4	1.5477	0.0123968	up
GPR34	2.61943	0.0127034	up
ERH	0.904341	0.0127481	up
ADGRG1	2.96875	0.0130271	up
IGF2R	0.494182	0.0130635	up
KRTCAP2	0.594075	0.013267	up
ETV3	-0.807769	0.0133658	down
APOBEC3C	0.489702	0.0134516	up
GRK5	1.51931	0.0134762	up
ARMCX2	-1.58401	0.0136927	down
TXNDC5	-0.991671	0.0138726	down
LOC102118918	-5.99551	0.014106	down
IL26	-3.77199	0.0143345	down
BTN1A1	-4.26958	0.0143729	down
NRIP1	-0.734038	0.0145098	down
PPIB	0.538043	0.0145617	up
ETS1	0.219561	0.0146197	up
CD55	1.53746	0.0147855	up
ARHGEF3	0.47916	0.0148707	up
SP100	0.361155	0.0149831	up
LOC102119252	-0.810799	0.0150328	down
SH3RF2	-0.82633	0.0153507	down
LOC102139696	-6.79651	0.0160096	down
GLIPR2	0.823109	0.0162565	up
BCL3	-0.458389	0.0162999	down
SCP2	0.619714	0.0163414	up
LMBR1	-0.912751	0.0165568	down
B2M	0.412183	0.0165858	up
IL23R	-1.27571	0.0166686	down
LYST	0.486811	0.0173931	up
IRF9	0.922968	0.0178641	up
LOC102134776	-0.514626	0.019049	down
B3GNT5	-3.28605	0.019167	down
CHST2	-1.2332	0.0193104	down
ADGRG5	0.925391	0.0210935	up
RAB11A	0.665854	0.0215999	up
CA10	-5.58292	0.0216022	down
RASD1	-1.32805	0.0218248	down
SRSF12	-3.83391	0.0218668	down
SHFM1	0.859536	0.0220042	up
ARL6IP5	0.417951	0.023049	up
FAM102A	-0.572473	0.0231011	down
LOC107128194	0.797501	0.0232152	up
SPRY1	-3.77887	0.0240747	down
RPIA	-0.955898	0.0241928	down
LOC107130439	-1.31923	0.0248705	down
C19H19orf43	0.444932	0.0249756	up
HELZ	-0.679474	0.0253893	down
LGALS1	0.823689	0.0254397	up
PSMD13	0.632179	0.0267519	up
MPP7	-0.741997	0.0273119	down
ZNF292	0.468995	0.0273887	up
FAM78A	0.908525	0.0276703	up
NUCB2	0.675143	0.0286789	up
PSME2	0.91678	0.0291644	up
SLC39A8	-1.055	0.0300527	down
BATF	0.751817	0.0313668	up
LOC107130625	-2.2417	0.0319878	down
LOC102132418	-0.7527	0.0327865	down
LOC102128220	-0.89488	0.0340637	down
EHBP1L1	0.717671	0.034412	up
LOC101865988	0.842451	0.0344275	up
PSMA7	0.509781	0.0344575	up
LAMTOR1	1.8248	0.0351498	up
SH3BGRL	1.40208	0.03518	up
LOC102120556	-0.722644	0.0355747	down
ND5	0.819123	0.0362784	up
LOC102139510	0.447492	0.0366998	up
ENSA	0.475506	0.0370027	up
SSB	0.559369	0.0371975	up
RILPL2	0.635097	0.0380724	up
PNPLA6	0.77653	0.0398258	up
TESC	0.516802	0.0412714	up
LOC102123039	-1.25517	0.0414121	down
PLK2	-1.57224	0.041582	down
MICU3	-2.65634	0.0417963	down
ATP5O	0.694378	0.0435842	up
THEMIS	0.610941	0.0439829	up
ZEB1	-0.675657	0.04419	down
BRSK1	-3.8432	0.0445867	down
FAM49B	0.520192	0.045552	up
VDAC3	0.53234	0.0465048	up
COPB1	0.593866	0.0481935	up
UBE2D3	-0.40109	0.0491044	down
MAP7D1	0.589795	0.0492994	up
RHOA	0.51105	0.0497665	up

## Sheet: Human NR4a1 lo vs hi - Fig 6e
gene_name	avg_log2FC	p_val_adj	trend
NFKBIA	-1.44326	6.92e-80	down
RGCC	-1.96433	9.47e-76	down
KLF6	-1.06356	1.09e-65	down
TNFAIP3	-1.0168	9.69e-65	down
DUSP1	-0.706387	8.35e-58	down
FOS	-1.18217	7.58e-56	down
RPS15A	0.303581	2.61e-55	up
AC020916.1	-1.57088	4.65e-51	down
JUN	-0.961037	6.83e-51	down
ZFP36	-0.772888	1.19e-47	down
CD69	-0.824282	6.49e-47	down
CCL4	-1.35814	2.68e-45	down
ZFP36L2	-0.600669	6.32e-44	down
DUSP2	-0.690634	3.44e-42	down
GIMAP1	1.10591	3.36e-41	up
BTG2	-1.08777	6.57e-40	down
FGFBP2	4.60333	1e-39	up
ALOX5AP	-0.946552	1.64e-39	down
MCL1	-0.841338	3.15e-39	down
NKG7	0.837616	4.52e-38	up
RPL26	0.3866	2.91e-37	up
ANXA1	-0.889947	5.36e-37	down
TMSB4X	0.387068	9.74e-37	up
GIMAP7	0.722394	1.14e-36	up
RPS15	0.323768	3.7e-36	up
CD27	1.04026	5.47e-35	up
RPL23A	0.441178	8.19e-35	up
DPP4	-2.70528	4.88e-33	down
RPL13	0.370664	1.03e-30	up
CX3CR1	4.14885	9.79e-30	up
FCMR	0.933433	1.05e-29	up
RPS23	0.342396	1.97e-29	up
MT2A	-1.11295	2.07e-29	down
RPS25	0.393347	2.66e-29	up
KLRC1	-2.02631	9.78e-29	down
CST7	0.513441	4.21e-28	up
MT1X	-1.28933	7.88e-28	down
S100A4	-0.55237	9.17e-28	down
RBPJ	-1.16345	9.37e-28	down
HLA-A	0.374504	3.02e-27	up
TSC22D3	-0.600729	1.12e-26	down
MALAT1	-0.42259	1.35e-26	down
CORO1A	0.495481	2.88e-26	up
RPL3	0.460948	3.87e-26	up
HLA-E	0.352091	5.54e-26	up
DDIT4	-0.766451	7.31e-26	down
LIMD2	0.571905	1.1e-25	up
PTPRCAP	0.408106	2.3e-25	up
RPL18A	0.271032	5.88e-25	up
FCGR3A	2.38828	1.19e-24	up
RPS3	0.233742	2.72e-24	up
PLAAT4	0.940321	7.07e-24	up
FTH1	-0.381149	1.13e-23	down
PPP1R15A	-0.912263	1.16e-23	down
GIMAP4	0.657467	1.2e-23	up
EEF1A1	0.286164	1.87e-23	up
RPS16	0.366761	2.15e-23	up
KLRG1	0.787271	2.5e-23	up
RPL7A	0.22116	2.54e-23	up
RPS18	0.372371	2.75e-23	up
HSP90AB1	-0.613435	3.97e-23	down
PLEK	1.03206	5.21e-23	up
RPS12	0.247249	7.71e-23	up
NCR3	-2.04205	9.55e-23	down
FOSB	-1.14485	1.09e-22	down
RPS27	0.294781	2.29e-22	up
PRSS23	4.7654	2.45e-22	up
RPS4X	0.307105	3.85e-22	up
DENND2D	0.748946	4.67e-22	up
RPS3A	0.31649	6.54e-22	up
RPS9	0.418191	1.35e-21	up
KLRB1	-1.5626	2.6e-21	down
RACK1	0.315671	2.96e-21	up
GIMAP5	0.814946	1.01e-20	up
NFKBIZ	-1.30006	2.86e-20	down
RPS28	0.27157	3.55e-20	up
RPL29	0.26849	3.99e-20	up
ACTG1	0.386146	4.18e-20	up
CD8B	0.504963	5.15e-20	up
RPSA	0.341397	5.47e-20	up
PFN1	0.394332	7.89e-20	up
RPL30	0.184572	4.43e-19	up
ATF3	-1.69959	1.36e-18	down
RPS19	0.294457	3.13e-18	up
RPS14	0.211607	4.77e-18	up
RPS6	0.378647	1.72e-17	up
RPL19	0.217478	1.99e-17	up
H3F3B	-0.352995	2.19e-17	down
ZNF331	-0.886793	2.57e-17	down
PCED1B-AS1	0.791913	6.14e-17	up
RPL14	0.246522	6.17e-17	up
MT-CO3	0.340394	7.29e-17	up
RPL15	0.2965	9.22e-17	up
SOCS1	-1.11307	1.19e-16	down
RPL6	0.215126	2.25e-16	up
CMC1	0.78008	4.46e-16	up
RPL10A	0.342279	4.84e-16	up
BTG1	-0.321861	5.03e-16	down
RPL13A	0.296068	7.39e-16	up
PHLDA1	-1.70286	8.85e-16	down
NR4A1	-1.7439	9.22e-16	down
SLC9A3R1	0.666575	9.5e-16	up
LINC00861	0.960178	9.76e-16	up
SASH3	0.772511	1.21e-15	up
TRAF3IP3	0.664513	1.63e-15	up
MT-CO2	0.244556	3.54e-15	up
GZMA	0.416407	3.69e-15	up
TIGIT	0.565062	5.38e-15	up
SLC2A3	-0.669083	9.53e-15	down
RORA	-1.19364	1.02e-14	down
MT-CYB	0.303534	1.51e-14	up
RPL21	0.333208	1.51e-14	up
LIME1	0.60053	1.91e-14	up
PFDN5	0.321242	1.97e-14	up
MYADM	-1.11784	3.3e-14	down
CRIP1	-0.573097	4.09e-14	down
TBC1D10C	0.557546	4.77e-14	up
GLUL	-1.12255	5.92e-14	down
CD40LG	-2.11495	9.32e-14	down
RPL36	0.24255	9.85e-14	up
GZMK	0.420923	1e-13	up
IL7R	-0.648603	1.05e-13	down
CCNH	-0.480349	2.43e-13	down
CCL20	-3.33863	3.2e-13	down
TLE5	0.926386	3.94e-13	up
JUNB	-0.528327	4.14e-13	down
CTSH	-1.39662	4.95e-13	down
EEF1D	0.25544	6.6e-13	up
MT-ND4L	0.286001	9.64e-13	up
ADGRG1	1.6187	1.18e-12	up
EIF3F	0.402295	2.14e-12	up
CTSW	0.558193	2.19e-12	up
ATP5PO	0.809881	4.93e-12	up
RPL17	0.261125	5.73e-12	up
KLRC4	1.12454	5.79e-12	up
CHI3L2	1.51889	6.09e-12	up
BHLHE40	-1.17898	9.43e-12	down
FTL	0.252692	1.22e-11	up
EEF2	0.322155	1.48e-11	up
G3BP2	-0.791129	1.64e-11	down
RPL9	0.306326	1.7e-11	up
SEPTIN9	0.689979	2.28e-11	up
C12orf57	0.347682	2.73e-11	up
RPL37A	0.291357	4.2e-11	up
RPS7	0.157323	4.79e-11	up
PPP1R18	0.536451	5.41e-11	up
SELL	1.1408	5.82e-11	up
S100A6	-0.356391	6.05e-11	down
SEPTIN6	0.755784	8.5e-11	up
IL23R	-3.0707	1.22e-10	down
FGR	1.55623	1.97e-10	up
SLC7A5	-1.02781	2.05e-10	down
CCR7	1.26494	2.18e-10	up
JUND	-0.816493	2.36e-10	down
CCR6	-1.72414	2.38e-10	down
EIF3G	0.431048	2.64e-10	up
TMSB10	0.189561	4.21e-10	up
KLRK1	0.640526	4.31e-10	up
MT-ND3	0.292006	4.82e-10	up
NR4A2	-0.626672	5.42e-10	down
RPS24	0.15964	5.48e-10	up
YPEL5	-0.616261	7.4e-10	down
GPSM3	0.409345	7.7e-10	up
PTGER4	-0.809768	8.71e-10	down
ITGB2	0.349958	8.73e-10	up
PTMA	-0.19983	9.83e-10	down
RPL36A	0.328947	1.08e-09	up
IFITM1	0.326119	1.11e-09	up
RPS5	0.277321	1.19e-09	up
CCND3	0.386858	1.22e-09	up
HERPUD1	-0.512738	1.24e-09	down
NOP53	0.407944	1.26e-09	up
IL12RB2	-2.06076	1.85e-09	down
ERP29	0.424874	2.04e-09	up
TECR	0.44508	2.32e-09	up
FCRL6	0.987917	2.33e-09	up
CSRNP1	-0.908586	2.5e-09	down
S1PR5	1.6452	3.54e-09	up
RPL28	0.133627	4.09e-09	up
C12orf75	0.58324	4.39e-09	up
SAMD3	0.497355	4.91e-09	up
SEPTIN7	0.570955	6.01e-09	up
DAPK2	-1.78063	6.16e-09	down
LGALS3	-0.618141	6.69e-09	down
HCST	0.303354	7.47e-09	up
NACA	0.195751	9.06e-09	up
HSPA5	-0.671004	9.95e-09	down
XCL1	-1.45703	9.98e-09	down
TRAV8-4	2.11113	1.24e-08	up
PDCD1	0.736518	1.26e-08	up
MT1E	-1.17626	1.41e-08	down
RPL35A	0.176577	1.54e-08	up
RPL24	0.212038	2.11e-08	up
TRBV6-5	1.43512	2.12e-08	up
ARHGAP25	0.665095	2.41e-08	up
CAPG	-1.14515	2.59e-08	down
RPS27A	0.140097	3.02e-08	up
TTC38	1.55867	3.2e-08	up
RPL27	0.295889	3.36e-08	up
ASCL2	2.54943	4.08e-08	up
ADAM19	-1.46068	4.29e-08	down
SNHG29	0.543652	4.83e-08	up
PNISR	0.382663	5.18e-08	up
RPL37	0.223379	5.21e-08	up
TNFRSF1A	1.03273	5.26e-08	up
RPL32	0.221504	7.3e-08	up
ABI3	0.694675	7.32e-08	up
CEBPD	-1.45435	8.56e-08	down
ANKRD28	-1.68921	8.63e-08	down
SHISA5	0.43556	9.12e-08	up
2025-09-07	-0.555103	9.52e-08	down
IL16	0.508957	1.51e-07	up
RBIS	0.918868	1.56e-07	up
GIMAP6	0.771112	1.59e-07	up
CD8A	0.277788	1.68e-07	up
SLC1A7	7.36443	3.31e-07	up
TNFRSF14	0.485053	3.58e-07	up
LITAF	0.279976	3.63e-07	up
RPS11	0.265589	5.37e-07	up
PTPN6	0.509927	6.17e-07	up
DNAJB1	-0.846474	6.76e-07	down
UBXN1	0.360442	8.02e-07	up
UBA52	0.190514	8.11e-07	up
SLC4A10	-2.82365	8.38e-07	down
PNRC1	-0.461805	1.12e-06	down
EEF1G	0.291692	1.18e-06	up
RAB37	0.861917	1.2e-06	up
PLAC8	0.949766	1.27e-06	up
MT-ATP8	0.251319	1.37e-06	up
SIT1	0.54008	1.44e-06	up
HLA-C	0.195622	1.54e-06	up
MICOS13	1.05216	1.57e-06	up
CASS4	-1.17787	1.6e-06	down
LAT	0.438468	1.95e-06	up
CFL1	0.220237	1.96e-06	up
HDDC2	0.745542	2.39e-06	up
C5orf56	0.919739	2.43e-06	up
KIAA1551	-0.550096	2.62e-06	down
PPIA	0.191547	2.72e-06	up
RORC	-1.82586	2.8e-06	down
RIPOR2	0.491272	3.13e-06	up
APOC1	-0.603045	3.14e-06	down
HLA-B	0.140707	3.18e-06	up
EIF3K	0.24091	3.49e-06	up
TMC8	0.507081	3.65e-06	up
RPL4	0.28874	4.53e-06	up
RPL27A	0.281481	5.08e-06	up
TRGV2	1.51426	5.62e-06	up
FADD	1.39453	6.01e-06	up
RPL35	0.203829	7.09e-06	up
SEPTIN1	0.605915	7.29e-06	up
C1orf21	0.928405	7.86e-06	up
IMP3	0.516795	8.12e-06	up
EIF4B	0.32856	8.39e-06	up
FKBP11	-0.734055	1.1e-05	down
FAM177A1	-0.66535	1.16e-05	down
TRAPPC1	0.297184	1.34e-05	up
LMNA	-1.23826	1.34e-05	down
SRGAP3	-1.23512	1.58e-05	down
HSPH1	-1.0077	2.06e-05	down
SERTAD1	-0.811833	2.19e-05	down
MT-CO1	0.158844	2.39e-05	up
PRF1	0.446016	2.77e-05	up
MT-ND5	0.226938	2.87e-05	up
RNF19A	-0.567415	2.88e-05	down
LRRN3	3.22684	3.07e-05	up
VAMP2	0.354947	3.47e-05	up
ASB2	1.03486	3.64e-05	up
LILRB1	1.8756	3.9e-05	up
TNF	-0.921438	4.65e-05	down
RCSD1	0.414532	5.95e-05	up
ZC3H12A	-1.05194	6.04e-05	down
FAM129A	-0.963696	6.05e-05	down
AREG	-0.932551	6.6e-05	down
BIRC3	-0.982861	8.2e-05	down
SRP9	0.362918	8.42e-05	up
RAB29	0.673296	8.56e-05	up
S1PR1	0.953605	8.68e-05	up
CTSC	0.32649	9.26e-05	up
TAGAP	-0.436506	9.79e-05	down
EGR2	-2.563	0.000121283	down
CD248	2.26344	0.000125064	up
CTSD	0.388192	0.00012772	up
CD82	-0.645292	0.000131203	down
SDCBP	-0.511875	0.000139811	down
EEF1B2	0.272754	0.000144837	up
ACAP1	0.354442	0.000196311	up
IL26	-3.18096	0.000197672	down
TOX	0.456822	0.000216182	up
HLA-DPB1	0.239119	0.000219223	up
SPRY1	-1.76462	0.000240859	down
DTHD1	0.303396	0.000284997	up
TWF2	0.437144	0.000290656	up
SLAMF6	0.579689	0.000339615	up
LEF1	0.917166	0.000357245	up
CEP78	1.08468	0.000362801	up
UBC	-0.327828	0.000366122	down
RARA	-1.21157	0.000366311	down
PDE4D	-0.675179	0.000373863	down
GOLIM4	-1.49631	0.0003803	down
CD5	0.394301	0.000383587	up
TMEM155	2.34404	0.000398662	up
GABARAPL1	-0.803136	0.000406501	down
HOPX	-0.5578	0.000413401	down
TRBV4-2	-1.45691	0.000438684	down
LAIR2	1.40843	0.00043931	up
CLDND1	0.458568	0.000458921	up
COX7A2L	0.354914	0.000463155	up
PLK3	-0.773599	0.000488465	down
EIF2S3	0.466922	0.000524043	up
LINC02195	-2.15968	0.000550043	down
PFKFB3	-0.916553	0.000566029	down
ZAP70	0.303413	0.00058273	up
TM4SF19	6.74189	0.000589164	up
PTP4A2	0.521726	0.00061364	up
STK17B	-0.423366	0.000704688	down
TUBA1A	-0.594463	0.00073568	down
FABP5	-0.727125	0.000758411	down
PPP1CA	0.305952	0.000767092	up
GNA15	-2.20249	0.000787682	down
SNHG6	0.487619	0.000826198	up
EML4	-0.397766	0.0008325	down
HIF1A	-0.67138	0.000901035	down
EIF3L	0.344822	0.000951195	up
APOBEC3C	0.488504	0.00103626	up
CDC25B	0.557915	0.00111539	up
RPS27L	0.358362	0.00129723	up
MT-ATP6	0.180575	0.00146142	up
ARPC4	0.45014	0.00148277	up
CD247	0.284909	0.00152749	up
SPON2	0.606823	0.0015925	up
AIP	0.377478	0.00175557	up
SMCO4	-1.38827	0.0017636	down
SF3A2	0.476114	0.00182982	up
B3GALT4	0.765089	0.00185228	up
ADAM12	-1.49707	0.00219149	down
CRBN	0.545524	0.00228474	up
PDLIM2	0.55209	0.00229501	up
ARPC2	0.23288	0.00234233	up
MICOS10	0.682827	0.00235537	up
CD74	0.221779	0.00280127	up
LINC02446	-0.741622	0.00289663	down
TMEM14C	-0.654543	0.00298314	down
PSMB10	0.222024	0.00301225	up
TRAV19	1.22397	0.00303722	up
PSMB8-AS1	0.519102	0.00306321	up
SH2D1A	0.246132	0.00307567	up
IL18RAP	-1.50239	0.00320966	down
GAS5	0.579425	0.00336737	up
SELENOH	0.271634	0.00345333	up
NFKBID	-1.15907	0.0034681	down
GZMM	0.28928	0.003483	up
DAXX	0.531477	0.00365279	up
AC243829.1	1.16617	0.00373161	up
RASSF5	0.387217	0.00376548	up
S100A8	-0.839009	0.00383454	down
CLU	-1.94609	0.00388802	down
CXCR4	-0.293413	0.00395042	down
PERP	-0.715421	0.00395404	down
NDUFB8	0.381271	0.00401844	up
CNN2	0.240233	0.00402191	up
EDF1	0.181356	0.00419131	up
FYB1	0.230418	0.00421993	up
ARRB2	0.38691	0.00438865	up
VNN2	0.856456	0.00460346	up
SYF2	0.360218	0.0052243	up
AP3S1	0.456743	0.00523882	up
RPLP0	0.143191	0.0052412	up
TNS3	-2.7573	0.00573471	down
CYFIP2	0.448302	0.00575902	up
OAZ1	0.16148	0.00610117	up
KLRC3	-0.823685	0.00662881	down
RHOG	0.291725	0.00728752	up
TAP2	0.572177	0.00732309	up
RHOF	0.354461	0.00758352	up
UBLCP1	0.649416	0.0078907	up
TNFRSF25	-0.87158	0.00805243	down
GCC2	0.330106	0.00819973	up
KDM6B	-1.2128	0.00829783	down
MRPS12	0.64184	0.00904387	up
SYNE1	0.39831	0.00917091	up
RBX1	0.357731	0.00939444	up
UQCRH	0.262009	0.00965433	up
LST1	-0.908105	0.0106591	down
LDLRAP1	0.568931	0.0109457	up
POP4	0.648931	0.0109509	up
BTN3A2	0.309316	0.0109559	up
KLRD1	-0.315542	0.011282	down
TOMM6	0.582531	0.0116821	up
TOMM7	0.185833	0.0116908	up
GPR25	-1.05963	0.0122946	down
JTB	0.262058	0.0131746	up
RPL38	0.212907	0.0138951	up
IFNG	-0.808192	0.0140076	down
CARS	0.65693	0.0142926	up
ARL6IP1	0.25094	0.01474	up
FOSL2	-0.866692	0.0147684	down
SPN	0.629826	0.0157472	up
EIF4A2	0.253251	0.0163139	up
CAP1	0.262352	0.0166418	up
AC016831.7	-0.991918	0.0167928	down
PTPN13	-3.78587	0.0173171	down
NR4A3	-1.1364	0.0178017	down
GPKOW	0.856818	0.0178176	up
NEU1	-1.03891	0.0178569	down
CCL3	-1.39721	0.0198288	down
YWHAQ	-0.498632	0.0201035	down
NDUFA11	0.277029	0.0202415	up
WDR86-AS1	-3.17319	0.0214448	down
TCF7	0.767442	0.0219115	up
RASSF1	0.52765	0.0233191	up
HNRNPF	0.239967	0.0234237	up
ING4	0.939851	0.0254895	up
SELENOK	-0.528293	0.0264527	down
TRAV38-2DV8	-1.18957	0.0269841	down
PRKCH	0.193464	0.0275145	up
MYO1G	0.464439	0.0276456	up
UBL5	0.187051	0.0276616	up
C11orf98	0.552796	0.027854	up
POLD4	0.382006	0.0284248	up
TSPYL2	-0.541055	0.0288194	down
PCED1B	0.450094	0.0289077	up
ITGA1	-0.689149	0.030191	down
ARHGAP4	0.371424	0.0310616	up
DNAJA1	-0.619818	0.0327113	down
TLE1	-1.75229	0.0343803	down
ZBP1	0.898975	0.0345165	up
MAX	0.341788	0.0347393	up
PYM1	0.7387	0.0362413	up
TTTY15	-0.904944	0.0368276	down
BRK1	0.249682	0.0372731	up
LINC01871	-0.766664	0.0387715	down
EGR1	-1.56163	0.0391632	down
SLC44A2	0.511378	0.0401965	up
PLEKHF1	0.758483	0.0409986	up
PSMC5	0.40333	0.0440455	up
RESF1	0.470125	0.0451807	up
APEX1	0.462383	0.045631	up
AQP3	-0.778882	0.0463881	down
IL17RE	-6.32303	0.046705	down
GYG1	-0.545124	0.047396	down
ACTN1	1.12035	0.0480073	up
LCK	0.172755	0.0482564	up
PSMF1	0.435962	0.049029	up
