# Supplementary material for: NR4A1 limits CD8⁺ T Cell effector responses and protection in tuberculosis
Source: Research Square preprint supplement (doi:10.21203/rs.3.rs-8363336/v1), 2026-01-13
Supplement: Supplementary file 2 [file 400e55fe7cadaf05bc8d15ac.xlsx]

## Sheet: 4wk time course - Ext. Fig 2b
GeneID	clusters	Symbol
ENSMUSG00000045934	i	Mtmr11
ENSMUSG00000063383	i	Zfp947
ENSMUSG00000086158	i	Pierce2
ENSMUSG00000027864	i	Ptgfrn
ENSMUSG00000087175	i	Gm15133
ENSMUSG00000027654	i	Fam83d
ENSMUSG00000073491	i	Ifi213
ENSMUSG00000022322	i	Shcbp1
ENSMUSG00000039187	i	Fanci
ENSMUSG00000028943	i	Espn
ENSMUSG00000033538	i	Casp4
ENSMUSG00000039315	i	Clnk
ENSMUSG00000062995	i	Ica1
ENSMUSG00000067297	i	Ifit1bl2
ENSMUSG00000116380	i	Gm39556
ENSMUSG00000121499	i	Ly6a2
ENSMUSG00000074604	i	Mgst2
ENSMUSG00000029561	i	Oasl2
ENSMUSG00000032591	i	Mst1
ENSMUSG00000039813	i	Tbc1d2
ENSMUSG00000029102	i	Hgfac
ENSMUSG00000022768	i	Ccdc116
ENSMUSG00000044258	i	Ctla2a
ENSMUSG00000029163	i	Emilin1
ENSMUSG00000097164	i	Cep83os
ENSMUSG00000042213	i	Zfand4
ENSMUSG00000028613	i	Lrp8
ENSMUSG00000116220	i	A430088P11Rik
ENSMUSG00000006179	i	Prss16
ENSMUSG00000030188	i	Magohb
ENSMUSG00000016529	i	Il10
ENSMUSG00000028367	i	Txn1
ENSMUSG00000059430	i	Actg2
ENSMUSG00000020439	i	Smtn
ENSMUSG00000073555	i	Gm4951
ENSMUSG00000001025	i	S100a6
ENSMUSG00000021675	i	F2rl2
ENSMUSG00000039578	i	Ccser1
ENSMUSG00000022580	i	Rhpn1
ENSMUSG00000023045	i	Soat2
ENSMUSG00000054672	i	Scart2
ENSMUSG00000086083	i	Gm15829
ENSMUSG00000074923	i	Pak6
ENSMUSG00000035042	i	Ccl5
ENSMUSG00000051111	i	Sv2c
ENSMUSG00000120131	i	Gm56844
ENSMUSG00000114279	i	H2bc14
ENSMUSG00000032238	i	Rora
ENSMUSG00000037129	i	Tmprss13
ENSMUSG00000064272	i	Gpbar1
ENSMUSG00000118361	i	Gm50237
ENSMUSG00000030167	i	Klrc1
ENSMUSG00000023467	i	Tulp2
ENSMUSG00000018930	i	Ccl4
ENSMUSG00000087651	i	1500009L16Rik
ENSMUSG00000039055	i	Eme1
ENSMUSG00000106269	i	4930580E04Rik
ENSMUSG00000094248	i	H2ac23
ENSMUSG00000094777	i	H2ac24
ENSMUSG00000029413	i	Naaa
ENSMUSG00000060509	i	Xcr1
ENSMUSG00000051969	i	Tlr11
ENSMUSG00000050014	i	Apol10b
ENSMUSG00000026536	i	Ifi211
ENSMUSG00000042842	i	Serpinb6b
ENSMUSG00000054203	i	Ifi205
ENSMUSG00000086154	i	Gm16196
ENSMUSG00000082120	i	Gm15720
ENSMUSG00000051359	i	Ncald
ENSMUSG00000000817	i	Fasl
ENSMUSG00000081603	i	Gm14681
ENSMUSG00000118054	i	Gm5238
ENSMUSG00000021250	i	Fos
ENSMUSG00000120586	i	Gm56830
ENSMUSG00000067591	i	Klra3
ENSMUSG00000030178	i	Klra13-ps
ENSMUSG00000002835	i	Chaf1a
ENSMUSG00000001444	i	Tbx21
ENSMUSG00000104413	i	Gm37065
ENSMUSG00000069713	i	4933406P04Rik
ENSMUSG00000020419	i	Hormad2
ENSMUSG00000084871	i	Gm2800
ENSMUSG00000121505	i	Gm4956
ENSMUSG00000086037	i	Gm16085
ENSMUSG00000097080	i	1700086O06Rik
ENSMUSG00000000753	i	Serpinf1
ENSMUSG00000051074	i	4930579K19Rik
ENSMUSG00000109108	i	Gm36371
ENSMUSG00000032661	i	Oas3
ENSMUSG00000037535	i	1700021A07Rik
ENSMUSG00000030107	i	Usp18
ENSMUSG00000110902	i	Gm33104
ENSMUSG00000024424	i	Ttc39c
ENSMUSG00000087060	i	Eldr
ENSMUSG00000026285	i	Pdcd1
ENSMUSG00000029001	i	Fbxo44
ENSMUSG00000018648	i	Dusp14
ENSMUSG00000078994	i	Zfp429
ENSMUSG00000026090	i	Cracdl
ENSMUSG00000119996	i	Gm57286
ENSMUSG00000015981	i	Stk32c
ENSMUSG00000031397	i	Tktl1
ENSMUSG00000067577	i	A430093F15Rik
ENSMUSG00000022586	i	Ly6i
ENSMUSG00000097113	i	Gm19705
ENSMUSG00000050445	i	Cyp8b1
ENSMUSG00000022440	i	C1qtnf6
ENSMUSG00000046080	i	Clec9a
ENSMUSG00000107715	i	Gm44135
ENSMUSG00000001334	i	Fndc5
ENSMUSG00000044703	i	Phf11a
ENSMUSG00000067610	i	Klri1
ENSMUSG00000033470	i	Cysltr2
ENSMUSG00000051354	i	Samd3
ENSMUSG00000050232	i	Cxcr3
ENSMUSG00000026068	i	Il18rap
ENSMUSG00000074874	i	Ctla2b
ENSMUSG00000054206	i	Gzmm
ENSMUSG00000062248	i	Cks2
ENSMUSG00000066363	i	Serpina3f
ENSMUSG00000041481	i	Serpina3g
ENSMUSG00000020808	i	Pimreg
ENSMUSG00000054717	i	Hmgb2
ENSMUSG00000027611	i	Procr
ENSMUSG00000028937	i	Acot7
ENSMUSG00000099875	i	Rbm3-ps
ENSMUSG00000049916	i	2610318N02Rik
ENSMUSG00000035148	i	Gpr33
ENSMUSG00000026573	i	Xcl1
ENSMUSG00000022584	i	Ly6c2
ENSMUSG00000112230	i	Ifngas1
ENSMUSG00000120726	i	Gm56619
ENSMUSG00000116508	i	Gm49463
ENSMUSG00000117871	i	Gm50287
ENSMUSG00000045467	i	Ttll13
ENSMUSG00000111243	i	Gm4668
ENSMUSG00000069272	i	H2ac8
ENSMUSG00000113669	i	Gm36723
ENSMUSG00000059042	i	Klk1b9
ENSMUSG00000118051	i	Gm8714
ENSMUSG00000113909	i	Gm36377
ENSMUSG00000086405	i	9330198N18Rik
ENSMUSG00000024936	i	Kcnk7
ENSMUSG00000111241	i	Gm19121
ENSMUSG00000086742	i	Gm16201
ENSMUSG00000108353	i	Gm45205
ENSMUSG00000019945	i	Cabcoco1
ENSMUSG00000097915	ii	A330009N23Rik
ENSMUSG00000118663	ii	Spata5l1
ENSMUSG00000031642	ii	Sh3rf1
ENSMUSG00000005124	ii	Ccn4
ENSMUSG00000072663	ii	Spef2
ENSMUSG00000036928	ii	Stag3
ENSMUSG00000117575	ii	Gm36486
ENSMUSG00000121150	ii	Gm56735
ENSMUSG00000090141	ii	Gm614
ENSMUSG00000007021	ii	Syngr3
ENSMUSG00000118210	ii	Gm50394
ENSMUSG00000037346	ii	Hrh4
ENSMUSG00000000531	ii	Tamalin
ENSMUSG00000026833	ii	Olfm1
ENSMUSG00000121098	ii	Gm56981
ENSMUSG00000104765	ii	Gm43058
ENSMUSG00000120524	ii	Gm57209
ENSMUSG00000040435	ii	Ppp1r15a
ENSMUSG00000120054	ii	Gm57214
ENSMUSG00000026969	ii	Fam166a
ENSMUSG00000033952	ii	Aspm
ENSMUSG00000065147	ii	Snora31
ENSMUSG00000052684	ii	Jun
ENSMUSG00000003545	ii	Fosb
ENSMUSG00000091705	ii	H2-Q2
ENSMUSG00000106333	ii	4930428O21Rik
ENSMUSG00000103734	ii	Gm37651
ENSMUSG00000033295	ii	Ptprf
ENSMUSG00000037463	ii	Fbxo27
ENSMUSG00000050538	ii	B230217C12Rik
ENSMUSG00000083757	ii	Rps15a-ps4
ENSMUSG00000043079	ii	Synpo
ENSMUSG00000030268	ii	Bcat1
ENSMUSG00000104117	ii	Gm20743
ENSMUSG00000032400	ii	Zwilch
ENSMUSG00000085977	ii	Gm5970
ENSMUSG00000031202	ii	Rab39b
ENSMUSG00000118144	ii	Gm50313
ENSMUSG00000121478	ii	NA
ENSMUSG00000045348	ii	Nyap1
ENSMUSG00000110915	ii	Gm36198
ENSMUSG00000074215	ii	Gm10643
ENSMUSG00000107118	ii	Gm42986
ENSMUSG00000071192	ii	Wfikkn1
ENSMUSG00000027939	ii	Nup210l
ENSMUSG00000120516	ii	Gm56972
ENSMUSG00000061482	ii	H4c4
ENSMUSG00000040570	ii	Rundc3b
ENSMUSG00000032507	ii	Fbxl2
ENSMUSG00000120135	ii	Gm57236
ENSMUSG00000091472	ii	Gm3739
ENSMUSG00000085133	ii	B930095G15Rik
ENSMUSG00000106767	ii	Gm42727
ENSMUSG00000120372	ii	Gm57122
ENSMUSG00000111947	ii	Gm47438
ENSMUSG00000045087	ii	S1pr5
ENSMUSG00000059647	ii	Cbx3-ps7
ENSMUSG00000030981	ii	Mmp21
ENSMUSG00000026463	ii	Atp2b4
ENSMUSG00000096908	ii	Trav7-3
ENSMUSG00000020175	ii	Rab36
ENSMUSG00000001555	ii	Fkbp10
ENSMUSG00000020473	ii	Aebp1
ENSMUSG00000105789	ii	Gm42997
ENSMUSG00000038146	ii	Notch3
ENSMUSG00000120405	ii	Gm56781
ENSMUSG00000120141	ii	Gm56632
ENSMUSG00000079138	ii	Gm8818
ENSMUSG00000118866	ii	Rn7s1
ENSMUSG00000003032	ii	Klf4
ENSMUSG00000031398	ii	Plxna3
ENSMUSG00000121054	ii	C030010C08Rik
ENSMUSG00000007646	ii	Rad51c
ENSMUSG00000026941	ii	Mamdc4
ENSMUSG00000114213	ii	A430090L17Rik
ENSMUSG00000037003	ii	Tns2
ENSMUSG00000089900	ii	Tbc1d22bos
ENSMUSG00000029516	ii	Cit
ENSMUSG00000035246	ii	Pcyt1b
ENSMUSG00000017146	ii	Brca1
ENSMUSG00000098789	ii	Jmjd7
ENSMUSG00000094134	ii	Ighv5-15
ENSMUSG00000120049	ii	Gm57109
ENSMUSG00000103030	ii	E330011M16Rik
ENSMUSG00000053914	ii	Kdm4d
ENSMUSG00000069273	ii	H3c6
ENSMUSG00000100210	ii	H3c7
ENSMUSG00000047678	ii	Gpr82
ENSMUSG00000074807	ii	Gm10762
ENSMUSG00000021453	ii	Gadd45g
ENSMUSG00000026955	ii	Sapcd2
ENSMUSG00000079018	ii	Ly6c1
ENSMUSG00000026475	ii	Rgs16
ENSMUSG00000008136	ii	Fhl2
ENSMUSG00000092557	ii	Gm8696
ENSMUSG00000094799	ii	NA
ENSMUSG00000065176	ii	Rnu12
ENSMUSG00000028246	ii	Faxc
ENSMUSG00000054046	ii	Klk13
ENSMUSG00000027718	ii	Il21
ENSMUSG00000002190	ii	Clgn
ENSMUSG00002075781	ii	Gm55900
ENSMUSG00000087213	ii	2810408I11Rik
ENSMUSG00000085589	ii	A430078I02Rik
ENSMUSG00000068606	ii	Gm4841
ENSMUSG00000042751	ii	Nmnat2
ENSMUSG00000040253	ii	Gbp7
ENSMUSG00000028965	ii	Tnfrsf9
ENSMUSG00000049539	ii	H1f1
ENSMUSG00000100744	ii	Gm17764
ENSMUSG00000100170	ii	Gm28942
ENSMUSG00000038304	ii	Cd160
ENSMUSG00000112290	ii	Gm33782
ENSMUSG00000021136	ii	Smoc1
ENSMUSG00000060981	ii	H4c8
ENSMUSG00000049892	ii	Rasd1
ENSMUSG00000071658	ii	Gng3
ENSMUSG00000068220	ii	Lgals1
ENSMUSG00000035385	ii	Ccl2
ENSMUSG00000042581	ii	Thsd7b
ENSMUSG00000046733	ii	Gprc5a
ENSMUSG00000097266	ii	Gm26802
ENSMUSG00000105167	ii	Snord43
ENSMUSG00000098043	ii	Gm26980
ENSMUSG00000099569	ii	Gm18301
ENSMUSG00000103192	ii	Gm37645
ENSMUSG00000097414	ii	B130046B21Rik
ENSMUSG00000083534	ii	H2-M6-ps
ENSMUSG00000069310	ii	H3c3
ENSMUSG00000086442	ii	Gm11722
ENSMUSG00000111758	ii	Gm30373
ENSMUSG00000019817	ii	Plagl1
ENSMUSG00000084020	ii	Wsb2-ps
ENSMUSG00000020205	ii	Phlda1
ENSMUSG00000120343	ii	4930434J08Rik
ENSMUSG00000116868	ii	Gm29721
ENSMUSG00000091993	ii	B930036N10Rik
ENSMUSG00000120777	ii	Gm56626
ENSMUSG00000074170	ii	Plekhf1
ENSMUSG00000040298	ii	Btbd16
ENSMUSG00000097569	ii	Gm26640
ENSMUSG00000028885	ii	Smpdl3b
ENSMUSG00000112627	ii	4933412E12Rik
ENSMUSG00000027514	ii	Zbp1
ENSMUSG00000028270	ii	Gbp2
ENSMUSG00000000791	ii	Il12rb1
ENSMUSG00000111913	ii	Gm49751
ENSMUSG00000079362	ii	Gm43302
ENSMUSG00000104713	ii	Gbp6
ENSMUSG00000079363	ii	Gbp4
ENSMUSG00000078853	ii	Igtp
ENSMUSG00000082292	ii	Gm12250
ENSMUSG00000037725	ii	Ckap2
ENSMUSG00000105096	ii	Gbp10
ENSMUSG00000048852	ii	Gm12185
ENSMUSG00000020826	ii	Nos2
ENSMUSG00000037161	ii	Mgarp
ENSMUSG00000108436	ii	Gm44851
ENSMUSG00000055170	ii	Ifng
ENSMUSG00000015437	ii	Gzmb
ENSMUSG00000018341	ii	Il12rb2
ENSMUSG00000000562	ii	Adora3
ENSMUSG00000092021	ii	Gbp11
ENSMUSG00000109086	ii	Gm5596
ENSMUSG00000098934	ii	Gvin-ps4
ENSMUSG00000099241	ii	Gvin-ps2
ENSMUSG00000030114	ii	Klrg1
ENSMUSG00000000386	ii	Mx1
ENSMUSG00000054072	ii	Iigp1
ENSMUSG00000045868	ii	Gvin1
ENSMUSG00000078606	ii	Gvin2
ENSMUSG00000024989	ii	Cep55
ENSMUSG00000030154	ii	Klrb1f
ENSMUSG00000035365	ii	Parpbp
ENSMUSG00000052336	ii	Cx3cr1
ENSMUSG00000058773	ii	H1f5
ENSMUSG00000120892	ii	Gm56995
ENSMUSG00000029121	ii	Crmp1
ENSMUSG00000001517	ii	Foxm1
ENSMUSG00000031373	ii	Car5b
ENSMUSG00000042379	ii	Esm1
ENSMUSG00000028977	ii	Casz1
ENSMUSG00000022385	ii	Gtse1
ENSMUSG00000051378	ii	Kif18b
ENSMUSG00000026683	ii	Nuf2
ENSMUSG00000079227	ii	Ccr5
ENSMUSG00000027306	ii	Nusap1
ENSMUSG00000041431	ii	Ccnb1
ENSMUSG00000012443	ii	Kif11
ENSMUSG00000026669	ii	Mcm10
ENSMUSG00000028873	ii	Cdca8
ENSMUSG00000005233	ii	Spc25
ENSMUSG00000020649	ii	Rrm2
ENSMUSG00000050410	ii	Tcf19
ENSMUSG00000005470	ii	Asf1b
ENSMUSG00000027496	ii	Aurka
ENSMUSG00000028214	ii	Gem
ENSMUSG00000072980	ii	Oip5
ENSMUSG00000038379	ii	Ttk
ENSMUSG00000028718	ii	Stil
ENSMUSG00000036223	ii	Ska1
ENSMUSG00000049093	ii	Il23r
ENSMUSG00000020614	ii	Fam20a
ENSMUSG00000031756	ii	Cenpn
ENSMUSG00000037020	ii	Wdr62
ENSMUSG00000026605	ii	Cenpf
ENSMUSG00000031004	ii	Mki67
ENSMUSG00000036777	ii	Anln
ENSMUSG00000034883	ii	Lrr1
ENSMUSG00000095079	ii	Igha
ENSMUSG00000045273	ii	Cenph
ENSMUSG00000079553	ii	Kifc1
ENSMUSG00000000028	ii	Cdc45
ENSMUSG00000072082	ii	Ccnf
ENSMUSG00000020330	ii	Hmmr
ENSMUSG00000025747	ii	Tyms
ENSMUSG00000001403	ii	Ube2c
ENSMUSG00000023505	ii	Cdca3
ENSMUSG00000021485	ii	Mxd3
ENSMUSG00000019942	ii	Cdk1
ENSMUSG00000017716	ii	Birc5
ENSMUSG00000026039	ii	Sgo2a
ENSMUSG00000021965	ii	Ska3
ENSMUSG00000108090	ii	Gm6637
ENSMUSG00000027326	ii	Knl1
ENSMUSG00000026069	ii	Il1rl1
ENSMUSG00000069270	ii	H2ac6
ENSMUSG00000103646	ii	Gm37706
ENSMUSG00000034855	ii	Cxcl10
ENSMUSG00000112808	ii	Gm4739
ENSMUSG00000081671	ii	Gm13167
ENSMUSG00000084279	ii	Gm13232
ENSMUSG00000046341	ii	Gm11223
ENSMUSG00000068101	ii	Cenpm
ENSMUSG00000110570	ii	Gm45778
ENSMUSG00000033967	ii	Rnf225
ENSMUSG00000071176	ii	Arhgef10
ENSMUSG00000024842	ii	Cabp4
ENSMUSG00000040204	ii	Pclaf
ENSMUSG00000074476	ii	Spc24
ENSMUSG00000071552	ii	Tigit
ENSMUSG00000075602	ii	Ly6a
ENSMUSG00000029417	ii	Cxcl9
ENSMUSG00000028044	ii	Cks1b
ENSMUSG00000103261	ii	Gm36981
ENSMUSG00000110556	ii	Gm45762
ENSMUSG00000024793	ii	Tnfrsf25
ENSMUSG00000114104	ii	Gm47585
ENSMUSG00000041064	ii	Pif1
ENSMUSG00000078773	ii	Rad54b
ENSMUSG00000020185	ii	E2f7
ENSMUSG00000091091	ii	Kcnmb3
ENSMUSG00000034329	ii	Brip1
ENSMUSG00000033031	ii	Cip2a
ENSMUSG00000004988	ii	Fxyd4
ENSMUSG00000103105	ii	Gm18752
ENSMUSG00000032783	ii	Troap
ENSMUSG00000020493	ii	Prr11
ENSMUSG00000034311	ii	Kif4
ENSMUSG00000023940	ii	Sgo1
ENSMUSG00000035455	ii	Fignl1
ENSMUSG00000039396	ii	Neil3
ENSMUSG00000038943	ii	Prc1
ENSMUSG00000058290	ii	Espl1
ENSMUSG00000002055	ii	Spag5
ENSMUSG00000117964	ii	Gm36043
ENSMUSG00000035683	ii	Melk
ENSMUSG00000030346	ii	Rad51ap1
ENSMUSG00000024791	ii	Cdca5
ENSMUSG00000027379	ii	Bub1
ENSMUSG00000030677	ii	Kif22
ENSMUSG00000027715	ii	Ccna2
ENSMUSG00000032218	ii	Ccnb2
ENSMUSG00000020897	ii	Aurkb
ENSMUSG00000042385	ii	Gzmk
ENSMUSG00000003779	ii	Kif20a
ENSMUSG00000022034	ii	Esco2
ENSMUSG00000020914	ii	Top2a
ENSMUSG00000015880	ii	Ncapg
ENSMUSG00000028678	ii	Kif2c
ENSMUSG00000040084	ii	Bub1b
ENSMUSG00000027454	ii	Gins1
ENSMUSG00000031639	ii	Tlr3
ENSMUSG00000006310	ii	Zbtb32
ENSMUSG00000094017	ii	Gm13160
ENSMUSG00000032113	ii	Chek1
ENSMUSG00000048922	ii	Cdca2
ENSMUSG00000037474	ii	Dtl
ENSMUSG00000048327	ii	Ckap2l
ENSMUSG00000027323	ii	Rad51
ENSMUSG00000027469	ii	Tpx2
ENSMUSG00000036768	ii	Kif15
ENSMUSG00000045328	ii	Cenpe
ENSMUSG00000023132	ii	Gzma
ENSMUSG00000006398	ii	Cdc20
ENSMUSG00000037313	ii	Tacc3
ENSMUSG00000028175	ii	Depdc1a
ENSMUSG00000030867	ii	Plk1
ENSMUSG00000001228	ii	Uhrf1
ENSMUSG00000042489	ii	Clspn
ENSMUSG00000026622	ii	Nek2
ENSMUSG00000034023	ii	Fancd2
ENSMUSG00000029822	ii	Osbpl3
ENSMUSG00000021569	ii	Trip13
ENSMUSG00000076586	iii	Igkv8-21
ENSMUSG00000027983	iii	Cyp2u1
ENSMUSG00000017195	iii	Zpbp2
ENSMUSG00000101236	iii	Gm6750
ENSMUSG00000020407	iii	Upp1
ENSMUSG00000044485	iii	Klk1b11
ENSMUSG00000079396	iii	Gm3411
ENSMUSG00000063388	iii	BC023105
ENSMUSG00000007783	iii	Cpt1c
ENSMUSG00000097662	iii	Gm2093
ENSMUSG00000080076	iii	H2ac14-ps
ENSMUSG00000022456	iii	Septin3
ENSMUSG00000097828	iii	6430562O15Rik
ENSMUSG00000046959	iii	Slc26a1
ENSMUSG00000079357	iii	Gm11100
ENSMUSG00000120890	iii	Gm56665
ENSMUSG00000076674	iii	Ighv3-8
ENSMUSG00000076563	iii	Igkv5-48
ENSMUSG00000083022	iii	Rps15a-ps6
ENSMUSG00000095865	iii	Gm13237
ENSMUSG00000081087	iii	Rps15a-ps7
ENSMUSG00000066362	iii	Rps13-ps1
ENSMUSG00000067058	iii	Rps15a-ps5
ENSMUSG00000056032	iii	BC018473
ENSMUSG00000096755	iii	Ftl1-ps2
ENSMUSG00000074479	iii	Rtraf-ps
ENSMUSG00000072421	iii	Gm10357
ENSMUSG00000101496	iii	Gm8885
ENSMUSG00000063903	iii	Klk1
ENSMUSG00000059031	iii	Or5p58
ENSMUSG00000079067	iii	Hmgn2-ps1
ENSMUSG00000094627	iii	Gm10182
ENSMUSG00000040498	iii	Igsf23
ENSMUSG00000056671	iii	Prelid2
ENSMUSG00000079364	iii	Gm3558
ENSMUSG00000015966	iv	Il17rb
ENSMUSG00000102235	iv	Gm37886
ENSMUSG00000115969	iv	Gm46519
ENSMUSG00000117768	iv	8030456M14Rik
ENSMUSG00000061882	iv	Ccdc62
ENSMUSG00000059027	iv	9630013D21Rik
ENSMUSG00000101258	iv	Gm29477
ENSMUSG00000002012	iv	Pnck
ENSMUSG00000040289	iv	Hey1
ENSMUSG00000020992	iv	4930512B01Rik
ENSMUSG00000104020	iv	Gm37215
ENSMUSG00000117634	iv	Gm50069
ENSMUSG00000113634	iv	Gm36756
ENSMUSG00000081078	iv	Gm12568
ENSMUSG00000028601	iv	Echdc2
ENSMUSG00000028528	iv	Dnajc6
ENSMUSG00000110866	iv	Gm48362
ENSMUSG00000102881	iv	Gm3807
ENSMUSG00000103672	iv	Gm37621
ENSMUSG00000120752	iv	Gm57289
ENSMUSG00000084862	iv	Gm16278
ENSMUSG00000011171	iv	Vipr2
ENSMUSG00000058260	iv	Serpina9
ENSMUSG00000013921	iv	Clip3
ENSMUSG00000120222	iv	Gm56512
ENSMUSG00000087128	iv	Gm12655
ENSMUSG00000037982	iv	Gm9725
ENSMUSG00000102863	iv	Gm37639
ENSMUSG00000116761	iv	Gm36796
ENSMUSG00000050982	iv	Apol10a
ENSMUSG00000085398	iv	4931406G06Rik
ENSMUSG00000019558	iv	Slc6a8
ENSMUSG00000062470	iv	Fbxl12os
ENSMUSG00000028068	iv	Iqgap3
ENSMUSG00000113326	iv	Gm47586
ENSMUSG00000074480	iv	Mex3a
ENSMUSG00000082264	iv	Gm12799
ENSMUSG00000096010	iv	H4c16
ENSMUSG00000105460	iv	Gm42671
ENSMUSG00000038576	iv	Susd4
ENSMUSG00000026478	iv	Lamc1
ENSMUSG00000059674	iv	Cdh24
ENSMUSG00000090069	iv	E430024P14Rik
ENSMUSG00000026770	iv	Il2ra
ENSMUSG00000038010	iv	Ccdc138
ENSMUSG00000018451	iv	6330403K07Rik
ENSMUSG00000034981	iv	Parm1
ENSMUSG00000097261	iv	4930532G15Rik
ENSMUSG00000104546	iv	Gm43858
ENSMUSG00000094509	iv	Ighv14-1
ENSMUSG00000095285	iv	Ighv5-9
ENSMUSG00000061878	iv	Sphk1
ENSMUSG00000059970	iv	Hspa2
ENSMUSG00000039748	iv	Exo1
ENSMUSG00000042766	iv	Trim46
ENSMUSG00000030208	iv	Emp1
ENSMUSG00000014846	iv	Tppp3
ENSMUSG00000102776	iv	Gm38162
ENSMUSG00000047841	iv	Fndc11
ENSMUSG00000120837	iv	Gm57245
ENSMUSG00000029797	iv	Sspo
ENSMUSG00000112288	iv	Gm47879
ENSMUSG00000061751	v	Kalrn
ENSMUSG00000022126	v	Acod1
ENSMUSG00000005824	v	Tnfsf14
ENSMUSG00000113136	v	Gm19951
ENSMUSG00000090439	v	Gm17455
ENSMUSG00000112148	v	Lilrb4a
ENSMUSG00000030589	v	Rasgrp4
ENSMUSG00000112023	v	Lilrb4b
ENSMUSG00000000157	v	Itgb2l
ENSMUSG00000078864	v	Gm14322
ENSMUSG00000051343	v	Rab11fip5
ENSMUSG00000039013	v	Siglecf
ENSMUSG00000025064	v	Col17a1
ENSMUSG00000113010	v	Gm34084
ENSMUSG00000030159	v	Clec1b
ENSMUSG00000025876	v	Unc5a
ENSMUSG00000038781	v	Stap2
ENSMUSG00000026893	v	Gca
ENSMUSG00000054169	v	Ceacam10
ENSMUSG00000038357	v	Camp
ENSMUSG00000026822	v	Lcn2
ENSMUSG00000032484	v	Ngp
ENSMUSG00000040809	v	Chil3
ENSMUSG00000042807	v	Hecw2
ENSMUSG00000027313	v	Chac1
ENSMUSG00000032387	v	Rbpms2
ENSMUSG00000054589	v	Gm9949
ENSMUSG00000074570	v	Cass4
ENSMUSG00000031377	v	Bmx
ENSMUSG00000106478	v	Gm36551
ENSMUSG00000115946	v	Mirt2
ENSMUSG00000090192	v	Gm16556
ENSMUSG00000031595	v	Pdgfrl
ENSMUSG00000046768	v	Rhoj
ENSMUSG00000026981	v	Il1rn
ENSMUSG00000045954	v	Cavin2
ENSMUSG00000022861	v	Dgkg
ENSMUSG00000002847	v	Pla1a
ENSMUSG00000027230	v	Creb3l1
ENSMUSG00000014543	v	Klra17
ENSMUSG00000054931	v	Zkscan4
ENSMUSG00000121186	v	Gm39792
ENSMUSG00000046794	v	Ppp1r3b
ENSMUSG00000047592	v	Nxpe5
ENSMUSG00000052270	v	Fpr2
ENSMUSG00000017607	v	Tns4
ENSMUSG00000043740	v	B430306N03Rik
ENSMUSG00000039450	v	Dcxr
ENSMUSG00000046223	v	Plaur
ENSMUSG00000054855	v	Rnd1
ENSMUSG00000093906	v	Igkv9-129
ENSMUSG00000087450	v	Gm13994
ENSMUSG00000050675	v	Gp1ba
ENSMUSG00000089849	v	Runx2os2
ENSMUSG00000027533	v	Fabp5
ENSMUSG00000106609	v	Gm43181
ENSMUSG00000030142	v	Clec4e
ENSMUSG00000079597	v	Cstdc4
ENSMUSG00000021701	v	Plk2
ENSMUSG00000032487	v	Ptgs2
ENSMUSG00000102975	v	Gm37347
ENSMUSG00000031825	v	Crispld2
ENSMUSG00000038740	v	Mvb12b
ENSMUSG00000085915	v	Gm8091
ENSMUSG00000031584	v	Gsr
ENSMUSG00000001156	v	Mxd1
ENSMUSG00000061815	v	Rufy4
ENSMUSG00000000204	v	Slfn4
ENSMUSG00000120788	v	Gm36393
ENSMUSG00000117315	v	1600022D10Rik
ENSMUSG00000029005	v	Draxin
ENSMUSG00000085375	v	Gm12506
ENSMUSG00000046908	v	Ltb4r1
ENSMUSG00000121227	v	Gm56918
ENSMUSG00000024053	v	Emilin2
ENSMUSG00000025330	v	Padi4
ENSMUSG00000051490	v	Foxd4
ENSMUSG00000085331	v	Gm11274
ENSMUSG00000085672	v	Gm16193
ENSMUSG00000025161	v	Slc16a3
ENSMUSG00000078817	v	Nlrp12
ENSMUSG00000026073	v	Il1r2
ENSMUSG00000027360	v	Hdc
ENSMUSG00000086564	v	Cd101
ENSMUSG00000067235	v	H2-Q10
ENSMUSG00000027068	v	Dhrs9
ENSMUSG00000050989	v	Selenon
ENSMUSG00000024659	v	Anxa1
ENSMUSG00000057182	v	Scn3a
ENSMUSG00000097899	v	Gm16894
ENSMUSG00000098144	v	1700029N11Rik
ENSMUSG00000098489	v	Mir7678
ENSMUSG00000056643	v	Chst13
ENSMUSG00000041782	v	Lad1
ENSMUSG00000112097	v	Gm32515
ENSMUSG00000059657	v	Stfa2l1
ENSMUSG00000079164	v	Tlr5
ENSMUSG00000035783	v	Acta2
ENSMUSG00000012350	v	Ehf
ENSMUSG00000020892	v	Aloxe3
ENSMUSG00000086765	v	Gm11827
ENSMUSG00000039616	v	Mocos
ENSMUSG00000053338	v	Tarm1
ENSMUSG00000051748	v	Wfdc21
ENSMUSG00000046079	v	Lrrc8d
ENSMUSG00000086146	v	Gm15729
ENSMUSG00000069792	v	Wfdc17
ENSMUSG00000117485	v	Gm19696
ENSMUSG00000026579	v	F5
ENSMUSG00000054951	v	9130008F23Rik
ENSMUSG00000049653	v	Spatc1
ENSMUSG00000048234	v	Rnf149
ENSMUSG00000032766	v	Gng11
ENSMUSG00000001946	v	Esam
ENSMUSG00000090231	v	Cfb
ENSMUSG00000012428	v	Steap4
ENSMUSG00000079293	v	Clec7a
ENSMUSG00000041754	v	Trem3
ENSMUSG00000093973	v	Mrgpra2a
ENSMUSG00000096719	v	Mrgpra2b
ENSMUSG00000052212	v	Cd177
ENSMUSG00000005800	v	Mmp8
ENSMUSG00000032496	v	Ltf
ENSMUSG00000031765	v	Mt1
ENSMUSG00000022651	v	Retnlg
ENSMUSG00000056054	v	S100a8
ENSMUSG00000056071	v	S100a9
ENSMUSG00000026357	v	Rgs18
ENSMUSG00000111167	v	Gm39321
ENSMUSG00000085148	v	Mir22hg
ENSMUSG00000024011	v	Pi16
ENSMUSG00000064246	v	Chil1
ENSMUSG00000022582	v	Ly6g
ENSMUSG00000107355	v	AI839979
ENSMUSG00000026220	v	Slc16a14
ENSMUSG00000120542	v	Gm57199
ENSMUSG00000031214	v	Ophn1
ENSMUSG00000097754	v	Ptgs2os2
ENSMUSG00000049999	v	Ppp1r3d
ENSMUSG00000115816	v	Gm34589
ENSMUSG00000018698	v	Lhx1
ENSMUSG00000108291	v	Gm44292
ENSMUSG00000027737	v	Slc7a11
ENSMUSG00000043157	v	Arl11
ENSMUSG00000028557	v	Rnf11
ENSMUSG00000089931	v	Gm8459
ENSMUSG00000000693	v	Loxl3
ENSMUSG00000069873	v	4930438A08Rik
ENSMUSG00000021360	v	Gcnt2
ENSMUSG00000052749	v	Trim30b
ENSMUSG00000064147	v	Rab44
ENSMUSG00000031722	v	Hp
ENSMUSG00000030144	v	Clec4d
ENSMUSG00000075705	v	Msrb1
ENSMUSG00000036181	v	H1f2
ENSMUSG00000025491	v	Ifitm1
ENSMUSG00000017737	v	Mmp9
ENSMUSG00000037095	v	Lrg1
ENSMUSG00000038508	v	Gdf15
ENSMUSG00000030340	v	Scnn1a
ENSMUSG00000025351	v	Cd63
ENSMUSG00000027072	v	Prg3
ENSMUSG00000022836	v	Mylk
ENSMUSG00000034641	v	Cd300ld
ENSMUSG00000090307	v	1700071M16Rik
ENSMUSG00000083677	v	Gm11699
ENSMUSG00000030747	v	Dgat2
ENSMUSG00000027506	v	Tpd52
ENSMUSG00000001930	v	Vwf
ENSMUSG00000095028	v	Sirpb1b
ENSMUSG00000074677	v	Sirpb1c
ENSMUSG00000078122	v	F630028O10Rik
ENSMUSG00000047798	v	Cd300lf
ENSMUSG00000095788	v	Sirpb1a
ENSMUSG00000114554	v	5430425K12Rik
ENSMUSG00000044103	v	Il36g
ENSMUSG00000120077	v	Gm41659
ENSMUSG00000028859	v	Csf3r
ENSMUSG00000027398	v	Il1b
ENSMUSG00000049130	v	C5ar1
ENSMUSG00000021125	v	Arg2
ENSMUSG00000069516	v	Lyz2
ENSMUSG00000018927	v	Ccl6
ENSMUSG00000056529	v	Ptafr
ENSMUSG00000033720	v	Sfxn5
ENSMUSG00000040907	v	Atp1a3
ENSMUSG00000051397	v	Tacstd2
ENSMUSG00000026180	v	Cxcr2
ENSMUSG00000033508	v	Asprv1
ENSMUSG00000036067	v	Slc2a6
ENSMUSG00000005087	v	Cd44
ENSMUSG00000022534	v	Mefv
ENSMUSG00000021281	v	Tnfaip2
ENSMUSG00000013974	v	Mcemp1
ENSMUSG00000043939	v	A530064D06Rik
ENSMUSG00000021069	v	Pygl
ENSMUSG00000058099	v	Nfam1
ENSMUSG00000025804	v	Ccr1
ENSMUSG00000018102	v	H2bc4
ENSMUSG00000060591	v	Ifitm2
ENSMUSG00000030054	v	Gp9
ENSMUSG00000072066	v	6720489N17Rik
ENSMUSG00000096833	v	Igkv4-55
ENSMUSG00000026835	v	Fcnb
ENSMUSG00000046841	v	Ckap4
ENSMUSG00000086763	v	Plxna4os1
ENSMUSG00000020325	v	Fstl3
ENSMUSG00000073386	v	9830107B12Rik
ENSMUSG00000000359	v	Rem1
ENSMUSG00000103546	v	Gm37666
ENSMUSG00000121007	v	Gm57303
ENSMUSG00000030088	v	Aldh1l1
ENSMUSG00000038793	v	Lefty1
ENSMUSG00000023078	v	Cxcl13
ENSMUSG00000067613	v	Krt83
ENSMUSG00000035713	v	Usp35
ENSMUSG00000060594	v	Layn
ENSMUSG00000019312	v	Grb7
ENSMUSG00000036938	v	Try5
ENSMUSG00000076569	v	Igkv5-39
ENSMUSG00000079190	v	NA
ENSMUSG00002076561	v	Gm55543
ENSMUSG00000029381	v	Shroom3
ENSMUSG00000004791	v	Pgf
ENSMUSG00000054263	v	Lifr
ENSMUSG00000027276	v	Jag1
ENSMUSG00000113041	v	Gm48302
ENSMUSG00000099930	v	Gm2396
ENSMUSG00000106039	v	Iglc4
ENSMUSG00000004814	vi	Ccl24
ENSMUSG00000035186	vi	Ubd
ENSMUSG00000040964	vi	Arhgef10l
ENSMUSG00002075324	vi	Gm56237
ENSMUSG00000070873	vi	Lilra5
ENSMUSG00000081723	vi	Gm15931
ENSMUSG00000011382	vi	Dhdh
ENSMUSG00000082062	vi	Ftl2-ps
ENSMUSG00000119232	vi	Mir692-2
ENSMUSG00000076218	vi	Mir692-1
ENSMUSG00000058542	vi	Gm15590
ENSMUSG00000081251	vi	Gm12164
ENSMUSG00002074878	vi	Gm55175
ENSMUSG00002075680	vi	Gm55531
ENSMUSG00000062382	vi	Ftl1-ps1
ENSMUSG00000057286	vi	St6galnac2
ENSMUSG00000074397	vi	Foxr1
ENSMUSG00000121352	vi	NA
ENSMUSG00000031495	vi	Cd209d
ENSMUSG00000040412	vi	Elapor1
ENSMUSG00000046352	vi	Gjb2
ENSMUSG00000030717	vi	Nupr1
ENSMUSG00000020017	vi	Hal
ENSMUSG00000068407	vi	Rnase12
ENSMUSG00000108878	vi	Gm49493
ENSMUSG00000039246	vi	Lyplal1
ENSMUSG00000022040	vi	Ephx2
ENSMUSG00000120996	vi	Gm56817
ENSMUSG00000120266	vi	Gm46828
ENSMUSG00000040564	vi	Apoc1
ENSMUSG00000066755	vi	Tnfsf18
ENSMUSG00000045763	vi	Basp1
ENSMUSG00000067336	vi	Bmpr2
ENSMUSG00000020458	vi	Rtn4
ENSMUSG00000038665	vi	Dgki
ENSMUSG00000035158	vi	Mitf
ENSMUSG00000051579	vi	Tceal8
ENSMUSG00000074280	vi	Gm6166
ENSMUSG00000027408	vi	Cpxm1
ENSMUSG00000032348	vi	Gsta4
ENSMUSG00000039956	vi	Mrap
ENSMUSG00000042439	vi	Zfp532
ENSMUSG00000058317	vi	Ube2e2
ENSMUSG00000020810	vi	Cygb
ENSMUSG00000061666	vi	Gdpd1
ENSMUSG00000047878	vi	A4galt
ENSMUSG00000111535	vi	Gm35154
ENSMUSG00000015354	vi	Pcolce2
ENSMUSG00000022181	vi	C6
ENSMUSG00000024371	vi	C2
ENSMUSG00000103967	vi	Gm38214
ENSMUSG00000050666	vi	Vstm4
ENSMUSG00000072596	vi	Ear2
ENSMUSG00000053553	vi	3110082I17Rik
ENSMUSG00000008540	vi	Mgst1
ENSMUSG00000064254	vi	Ethe1
ENSMUSG00000024661	vi	Fth1
ENSMUSG00000028736	vi	Pax7
ENSMUSG00000085860	vi	2410003L11Rik
ENSMUSG00000026939	vi	Tmem141
ENSMUSG00000073002	vi	Vamp5
ENSMUSG00000044811	vi	Cd300c2
ENSMUSG00000022235	vi	Cmbl
ENSMUSG00000074361	vi	C5ar2
ENSMUSG00000022788	vi	Fgd4
ENSMUSG00000034714	vi	Ttyh2
ENSMUSG00000020053	vi	Igf1
ENSMUSG00000036606	vi	Plxnb2
ENSMUSG00000041695	vi	Kcnj2
ENSMUSG00000019647	vi	Sema6a
ENSMUSG00000040466	vi	Blvrb
ENSMUSG00000055546	vi	Timd4
ENSMUSG00000048078	vi	Tenm4
ENSMUSG00000021477	vi	Ctsl
ENSMUSG00000020057	vi	Dram1
ENSMUSG00000058254	vi	Tspan7
ENSMUSG00000048264	vi	Dip2c
ENSMUSG00000121011	vi	Gm56975
ENSMUSG00000013611	vi	Snx31
ENSMUSG00000029061	vi	Mmp23
ENSMUSG00000048200	vi	Cracr2b
ENSMUSG00000047747	vi	Rnf150
ENSMUSG00000004609	vi	Cd33
ENSMUSG00000021838	vi	Samd4
ENSMUSG00000042265	vi	Trem1
ENSMUSG00000078783	vi	Sirpd
ENSMUSG00000005237	vi	Dnah2
ENSMUSG00000026153	vi	Fam135a
ENSMUSG00000029810	vi	Tmem176b
ENSMUSG00000044708	vi	Kcnj10
ENSMUSG00000030761	vi	Myo7a
ENSMUSG00000040724	vi	Kcna2
ENSMUSG00000121135	vi	Hmga2-ps1
ENSMUSG00000052572	vi	Dlg2
ENSMUSG00000058435	vi	Btnl4
ENSMUSG00000049881	vi	2810025M15Rik
ENSMUSG00000003206	vi	Ebi3
ENSMUSG00000030447	vi	Cyfip1
ENSMUSG00000021423	vi	Ly86
ENSMUSG00000021306	vi	Gpr137b
ENSMUSG00000025779	vi	Ly96
ENSMUSG00000035268	vi	Pkig
ENSMUSG00000017009	vi	Sdc4
ENSMUSG00000072115	vi	Ang
ENSMUSG00000050777	vi	Tmem37
ENSMUSG00000020865	vi	Abcc3
ENSMUSG00000029998	vi	Pcyox1
ENSMUSG00000008845	vi	Cd163
ENSMUSG00000083282	vi	Ctsf
ENSMUSG00000031216	vi	Stard8
ENSMUSG00000034663	vi	Bmp2k
ENSMUSG00000062866	vi	Phactr2
ENSMUSG00000029821	vi	Gsdme
ENSMUSG00000019302	vi	Atp6v0a1
ENSMUSG00000014075	vi	Dynlt2b
ENSMUSG00000024985	vi	Tcf7l2
ENSMUSG00000003812	vi	Dnase2a
ENSMUSG00000052713	vi	Zfp608
ENSMUSG00000030769	vi	Slc5a11
ENSMUSG00000086548	vi	Gm12972
ENSMUSG00000027227	vi	Sord
ENSMUSG00000055541	vi	Lair1
ENSMUSG00000024164	vi	C3
ENSMUSG00000058135	vi	Gstm1
ENSMUSG00000031504	vi	Rab20
ENSMUSG00000046027	vi	Stard5
ENSMUSG00000015340	vi	Cybb
ENSMUSG00000029059	vi	Prxl2b
ENSMUSG00000002289	vi	Angptl4
ENSMUSG00000036661	vi	Dennd3
ENSMUSG00000034487	vi	Poglut3
ENSMUSG00000020829	vi	Slc46a1
ENSMUSG00000032066	vi	Bco2
ENSMUSG00000038349	vi	Plcl1
ENSMUSG00000057606	vi	Colq
ENSMUSG00000005803	vi	Sqor
ENSMUSG00000029484	vi	Anxa3
ENSMUSG00000025648	vi	Pfkfb4
ENSMUSG00000020388	vi	Pdlim4
ENSMUSG00000036292	vi	Gramd1c
ENSMUSG00000059089	vi	Fcgr4
ENSMUSG00000097378	vi	B230208H11Rik
ENSMUSG00000092618	vi	Btnl6
ENSMUSG00000045636	vi	Mtus1
ENSMUSG00000022026	vi	Olfm4
ENSMUSG00000039377	vi	Hlx
ENSMUSG00000039286	vi	Fndc3b
ENSMUSG00000109245	vi	Gm44860
ENSMUSG00000022057	vi	Adamdec1
ENSMUSG00000041268	vi	Dmxl2
ENSMUSG00000027624	vi	Epb41l1
ENSMUSG00000048440	vi	Cyp4f16
ENSMUSG00000025151	vi	Maged1
ENSMUSG00000029299	vi	Abcg3
ENSMUSG00000037706	vi	Cd81
ENSMUSG00000006611	vi	Hfe
ENSMUSG00000029470	vi	P2rx4
ENSMUSG00000038388	vi	Pals2
ENSMUSG00000040522	vi	Tlr8
ENSMUSG00000020061	vi	Mybpc1
ENSMUSG00000032890	vi	Rims3
ENSMUSG00000022272	vi	Myo10
ENSMUSG00000045625	vi	Pigz
ENSMUSG00000022817	vi	Itgb5
ENSMUSG00000020961	vi	Ston2
ENSMUSG00000022371	vi	Col14a1
ENSMUSG00000060044	vi	Tmem26
ENSMUSG00000024663	vi	Rab3il1
ENSMUSG00000027200	vi	Sema6d
ENSMUSG00000001552	vi	Jup
ENSMUSG00000066026	vi	Dhrs3
ENSMUSG00000025743	vi	Sdc3
ENSMUSG00000079037	vi	Prnp
ENSMUSG00000024044	vi	Epb41l3
ENSMUSG00000025464	vi	Paox
ENSMUSG00000022180	vi	Slc7a8
ENSMUSG00000002985	vi	Apoe
ENSMUSG00000070369	vi	Itgad
ENSMUSG00000002602	vi	Axl
ENSMUSG00000040713	vi	Creg1
ENSMUSG00000031483	vi	Erlin2
ENSMUSG00000029919	vi	Hpgds
ENSMUSG00000089942	vi	Pira2
ENSMUSG00000022257	vi	Laptm4b
ENSMUSG00000116114	vi	Gm35853
ENSMUSG00000020432	vi	Tcn2
ENSMUSG00000020010	vi	Vnn3
ENSMUSG00000036402	vi	Gng12
ENSMUSG00000020376	vi	Rnf130
ENSMUSG00000109680	vi	Gm32098
ENSMUSG00000030339	vi	Ltbr
ENSMUSG00000073876	vi	Gm13305
ENSMUSG00000078735	vi	Il11ra2
ENSMUSG00000037031	vi	Tspan15
ENSMUSG00000015305	vi	Sash1
ENSMUSG00000045664	vi	Cdc42ep2
ENSMUSG00000052131	vi	Akr1b7
ENSMUSG00000067586	vi	S1pr3
ENSMUSG00000034101	vi	Ctnnd1
ENSMUSG00000027322	vi	Siglec1
ENSMUSG00000074419	vi	Pira13
ENSMUSG00000078780	vi	Gm5150
ENSMUSG00000023019	vi	Gpd1
ENSMUSG00000060512	vi	0610040J01Rik
ENSMUSG00000063611	vi	Gm10134
ENSMUSG00000011148	vi	Adssl1
ENSMUSG00000027030	vi	Stk39
ENSMUSG00000031490	vi	Eif4ebp1
ENSMUSG00000071324	vi	Armc2
ENSMUSG00000036896	vi	C1qc
ENSMUSG00000025092	vi	Hspa12a
ENSMUSG00000121184	vi	Gm57395
ENSMUSG00000027938	vi	Creb3l4
ENSMUSG00000101389	vi	Ms4a4a
ENSMUSG00000120878	vi	Gm56663
ENSMUSG00000053004	vi	Hrh1
ENSMUSG00000075558	vi	Gm17151
ENSMUSG00000003617	vi	Cp
ENSMUSG00000030825	vi	Hsd17b14
ENSMUSG00000100060	vi	Gm17944
ENSMUSG00000026604	vi	Ptpn14
ENSMUSG00000034039	vi	Prss29
ENSMUSG00000055994	vi	Nod2
ENSMUSG00000079707	vi	Dynlt2a1
ENSMUSG00000074623	vi	Gm826
ENSMUSG00000026208	vi	Des
ENSMUSG00000038042	vi	Ptpdc1
ENSMUSG00000036169	vi	Sostdc1
ENSMUSG00000032739	vi	Pram1
ENSMUSG00000019944	vi	Rhobtb1
ENSMUSG00000019122	vi	Ccl9
ENSMUSG00000056124	vi	B4galt6
ENSMUSG00000097077	vi	Gm16712
ENSMUSG00000116957	vi	Gm34680
ENSMUSG00000031497	vi	Tnfsf13b
ENSMUSG00000009633	vi	G0s2
ENSMUSG00000023903	vi	Mmp25
ENSMUSG00000018427	vi	Ypel2
ENSMUSG00000040627	vi	Aicda
ENSMUSG00000104348	vi	Gm37691
ENSMUSG00000111147	vi	Gm33699
ENSMUSG00000038782	vi	1700028J19Rik
ENSMUSG00000075025	vi	Gm10804
ENSMUSG00000021779	vi	Thrb
ENSMUSG00000060445	vi	Sycp2
ENSMUSG00000040726	vi	Hesx1
ENSMUSG00000047238	vi	Mageh1
ENSMUSG00000040209	vi	Zfp704
ENSMUSG00000044279	vi	Crb3
ENSMUSG00000101903	vi	Gm29291
ENSMUSG00000060798	vi	Intu
ENSMUSG00000025780	vi	Itih5
ENSMUSG00000070323	vi	Mmp27
ENSMUSG00000087187	vi	Gm13431
ENSMUSG00000101517	vi	4732465J04Rik
ENSMUSG00000085547	vi	Gm13767
ENSMUSG00000048031	vi	Fcrl5
ENSMUSG00000069041	vi	Slc25a31
ENSMUSG00000049580	vi	Tsku
ENSMUSG00000026649	vi	Cfap126
ENSMUSG00000104554	vi	Gm4610
ENSMUSG00000050270	vi	Tmem220
ENSMUSG00000028871	vi	Rspo1
ENSMUSG00000051022	vi	Hs3st1
ENSMUSG00000029314	vi	Gpat3
ENSMUSG00000022150	vi	Dab2
ENSMUSG00000027175	vi	Tcp11l1
ENSMUSG00000038473	vi	Nos1ap
ENSMUSG00000006389	vi	Mpl
ENSMUSG00000097694	vi	G730013B05Rik
ENSMUSG00000058794	vi	Nfe2
ENSMUSG00000031255	vi	Sytl4
ENSMUSG00000063234	vi	Gpr84
ENSMUSG00000040693	vi	Slco4c1
ENSMUSG00000039166	vi	Akap7
ENSMUSG00000095385	vi	D630033O11Rik
ENSMUSG00000069255	vi	Dusp22
ENSMUSG00000120977	vi	Gm32164
ENSMUSG00000033488	vi	Cryzl2
ENSMUSG00000009772	vi	Nuak2
ENSMUSG00000024340	vi	Btnl2
ENSMUSG00000074272	vi	Ceacam1
ENSMUSG00000029086	vi	Prom1
ENSMUSG00000030123	vi	Plxnd1
ENSMUSG00000024379	vi	Tslp
ENSMUSG00000040146	vi	Rgl3
ENSMUSG00000025856	vi	Pdgfa
ENSMUSG00000032261	vi	Sh3bgrl2
ENSMUSG00000064225	vi	Paqr9
ENSMUSG00000118669	vi	Arvcf
ENSMUSG00000026482	vi	Rgl1
ENSMUSG00000020102	vi	Slc16a7
ENSMUSG00000014778	vi	Fhod1
ENSMUSG00000026883	vi	Dab2ip
ENSMUSG00000005397	vi	Nid1
ENSMUSG00000121059	vi	Gm57137
ENSMUSG00000039704	vi	Lmbrd2
ENSMUSG00000027488	vi	Snta1
ENSMUSG00000055013	vi	Agap1
ENSMUSG00000031451	vi	Gas6
ENSMUSG00000038026	vi	Kcnj9
ENSMUSG00000005089	vi	Slc1a2
ENSMUSG00000014602	vi	Kif1a
ENSMUSG00000047786	vi	Lix1
ENSMUSG00000022103	vi	Gfra2
ENSMUSG00000014361	vi	Mertk
ENSMUSG00000099696	vi	2900052N01Rik
ENSMUSG00000016283	vi	H2-M2
ENSMUSG00000028019	vi	Pdgfc
ENSMUSG00000054385	vi	Ceacam2
ENSMUSG00000028121	vi	Bcar3
ENSMUSG00000104927	vi	Gm43388
ENSMUSG00000090939	vi	Gm17147
ENSMUSG00000041444	vi	Arhgap32
ENSMUSG00000035711	vi	Dok3
ENSMUSG00000014158	vi	Trpv4
ENSMUSG00000089809	vi	Rasgef1b
ENSMUSG00000116534	vi	Gm49731
ENSMUSG00000023022	vi	Lima1
ENSMUSG00000032122	vi	Slc37a2
ENSMUSG00000024737	vi	Slc15a3
ENSMUSG00000025314	vi	Ptprj
ENSMUSG00000021457	vi	Syk
ENSMUSG00000023990	vi	Tfeb
ENSMUSG00000003518	vi	Dusp3
ENSMUSG00000030259	vi	Rassf8
ENSMUSG00000022432	vi	Smc1b
ENSMUSG00000027656	vi	Ccn5
ENSMUSG00000054115	vi	Skp2
ENSMUSG00000026672	vi	Optn
ENSMUSG00002076074	vi	Gm56478
ENSMUSG00000006219	vi	Fblim1
ENSMUSG00000026442	vi	Nfasc
ENSMUSG00000037762	vi	Slc16a9
ENSMUSG00000033788	vi	Dysf
ENSMUSG00000120309	vi	Gm56745
ENSMUSG00000036353	vi	P2ry12
ENSMUSG00000025855	vi	Prkar1b
ENSMUSG00000092178	vii	Gm45351
ENSMUSG00000040694	vii	Apobec2
ENSMUSG00000069301	vii	H2ac11
ENSMUSG00000003534	vii	Ddr1
ENSMUSG00000047507	vii	Baiap3
ENSMUSG00000092368	vii	A930015D03Rik
ENSMUSG00000034854	vii	Mfsd12
ENSMUSG00000001918	vii	Slc1a5
ENSMUSG00000031803	vii	B3gnt3
ENSMUSG00000114390	vii	1700062C10Rik
ENSMUSG00000023979	vii	Guca1b
ENSMUSG00000050213	vii	Snip1
ENSMUSG00000040331	vii	Nsmce4a
ENSMUSG00000064120	vii	Mocs1
ENSMUSG00000045248	vii	Med26
ENSMUSG00000108980	vii	Gm45155
ENSMUSG00000031860	vii	Pbx4
ENSMUSG00000019732	vii	Calr3
ENSMUSG00000043664	vii	Tmem221
ENSMUSG00000086004	vii	Gm7805
ENSMUSG00000049357	vii	Brd8dc
ENSMUSG00000030325	vii	Klrb1c
ENSMUSG00000117465	vii	Gm49980
ENSMUSG00000073980	vii	Gm9574
ENSMUSG00000094942	vii	Gm3604
ENSMUSG00000121485	vii	NA
ENSMUSG00000039208	vii	Metrnl
ENSMUSG00000021322	vii	Aoah
ENSMUSG00000050315	vii	Synpo2
ENSMUSG00000115681	vii	Gm2682
ENSMUSG00000058975	vii	Kcnc1
ENSMUSG00000030553	vii	Pgpep1l
ENSMUSG00000039745	vii	Htatip2
ENSMUSG00000019539	vii	Rcn3
ENSMUSG00000074358	vii	Ccdc61
ENSMUSG00000024777	vii	Ppp2r5b
ENSMUSG00000035585	vii	Tsen34
ENSMUSG00000037979	vii	Ccdc92
ENSMUSG00000031791	vii	Tmem38a
ENSMUSG00000028982	vii	Slc25a33
ENSMUSG00000023092	vii	Fhl1
ENSMUSG00000095115	vii	Itpripl2
ENSMUSG00000021948	vii	Prkcd
ENSMUSG00000085795	vii	Zfp703
ENSMUSG00000043336	vii	Filip1l
ENSMUSG00000033910	vii	Gucy1a1
ENSMUSG00000047953	vii	Gp5
ENSMUSG00000027602	vii	Map1lc3a
ENSMUSG00000045975	vii	C2cd2
ENSMUSG00000120183	vii	1700085D22Rik
ENSMUSG00000029416	vii	Slc15a4
ENSMUSG00000027293	vii	Ehd4
ENSMUSG00000085586	vii	Gm11613
ENSMUSG00000049307	vii	Fut4
ENSMUSG00000031447	vii	Lamp1
ENSMUSG00000031662	vii	Snx20
ENSMUSG00000024012	vii	Mtch1
ENSMUSG00000029373	vii	Pf4
ENSMUSG00000021986	vii	Amer2
ENSMUSG00000026421	viii	Csrp1
ENSMUSG00000018417	viii	Myo1b
ENSMUSG00000035863	viii	Palm
ENSMUSG00000026321	viii	Tnfrsf11a
ENSMUSG00000041608	viii	Entpd3
ENSMUSG00000039512	viii	Uhrf1bp1
ENSMUSG00000045795	viii	Whamm
ENSMUSG00000097785	viii	B230217O12Rik
ENSMUSG00000046541	viii	Zfp526
ENSMUSG00000089742	viii	Gm15898
ENSMUSG00000105691	viii	Gm42876
ENSMUSG00000052512	viii	Nav2
ENSMUSG00000017400	viii	Stac2
ENSMUSG00000033544	viii	Angptl1
ENSMUSG00000107215	viii	Gm43197
ENSMUSG00000120747	viii	Gm56847
ENSMUSG00000111131	viii	9930024M15Rik
ENSMUSG00000028864	viii	Hgf
ENSMUSG00000095366	viii	Gm21860
ENSMUSG00000058325	viii	Dock1
ENSMUSG00000091264	viii	Smim13
ENSMUSG00000024736	viii	Tmem132a
ENSMUSG00000051586	viii	Mical3
ENSMUSG00000028042	viii	Zbtb7b
ENSMUSG00000026365	viii	Cfh
ENSMUSG00000071856	viii	Mcc
ENSMUSG00000073557	viii	Ppp1r12b
ENSMUSG00000103998	viii	Gm38025
ENSMUSG00000031390	viii	Avpr2
ENSMUSG00000097061	viii	9330151L19Rik
ENSMUSG00000039116	viii	Adgrg6
ENSMUSG00000032737	viii	Inppl1
ENSMUSG00000086779	viii	Gm13562
ENSMUSG00000117037	viii	Gm50433
ENSMUSG00000046410	viii	Kcnk6
ENSMUSG00000073414	viii	Mpig6b
ENSMUSG00000028207	viii	Asph
ENSMUSG00000027858	viii	Tspan2
ENSMUSG00000020841	viii	Cpd
ENSMUSG00000032691	viii	Nlrp3
ENSMUSG00000030657	viii	Xylt1
ENSMUSG00000059900	viii	Tmem40
ENSMUSG00000040152	viii	Thbs1
ENSMUSG00000054641	viii	Mmrn1
ENSMUSG00000050931	viii	Sgms2
ENSMUSG00000097779	viii	4833407H14Rik
ENSMUSG00000042286	viii	Stab1
ENSMUSG00000074794	viii	Arrdc3
ENSMUSG00000025154	viii	Arhgap19
ENSMUSG00000056130	viii	Ticam2
ENSMUSG00000068747	viii	Sort1
ENSMUSG00000058624	viii	Gda
ENSMUSG00000007837	viii	Prrg2
ENSMUSG00000029761	viii	Cald1
ENSMUSG00000111171	viii	Gm47815
ENSMUSG00000067818	viii	Myl9
ENSMUSG00000020787	viii	P2rx1
ENSMUSG00000021684	viii	Pde8b
ENSMUSG00000022324	viii	Matn2
ENSMUSG00000071637	viii	Cebpd
ENSMUSG00000020838	viii	Slc6a4
ENSMUSG00000022010	viii	Tsc22d1
ENSMUSG00000029372	viii	Ppbp
ENSMUSG00000054013	viii	Tmem179
ENSMUSG00000050708	viii	Ftl1
ENSMUSG00000086425	viii	F730016J06Rik
ENSMUSG00000121048	viii	Gm53066
ENSMUSG00000109713	viii	Pvrig
ENSMUSG00000042129	viii	Rassf4
ENSMUSG00000038843	viii	Gcnt1
ENSMUSG00000029560	viii	Snx8
ENSMUSG00000001249	viii	Hpn
ENSMUSG00000022419	viii	Deptor
ENSMUSG00000067389	viii	Gm17080
ENSMUSG00000017144	viii	Rnd3
ENSMUSG00000121051	viii	Gm57222
ENSMUSG00000031938	viii	4931406C07Rik
ENSMUSG00000019966	viii	Kitl
ENSMUSG00000038872	viii	Zfhx3
ENSMUSG00000108354	viii	4931431B13Rik
ENSMUSG00000019055	viii	Plod1
ENSMUSG00000050103	viii	Agmo
ENSMUSG00000021687	viii	Scamp1
ENSMUSG00000037605	viii	Adgrl3
ENSMUSG00000031523	viii	Dlc1
ENSMUSG00000043153	viii	Crppa
ENSMUSG00000030310	viii	Slc6a1
ENSMUSG00000032564	viii	Cpne4
ENSMUSG00000027762	viii	Sucnr1
ENSMUSG00000038034	viii	Igsf8
ENSMUSG00000025150	viii	Cbr2
ENSMUSG00000026131	viii	Dst
ENSMUSG00000024597	viii	Slc12a2
ENSMUSG00000006800	viii	Sulf2
ENSMUSG00000036264	viii	Fstl4
ENSMUSG00000027750	viii	Postn
ENSMUSG00000035969	viii	Rusc2
ENSMUSG00000060224	viii	Pyroxd2
ENSMUSG00000026141	viii	Col19a1
ENSMUSG00000030954	viii	Gp2
ENSMUSG00000036295	viii	Lrrn3
ENSMUSG00000092572	viii	Serpinb10
ENSMUSG00000114197	viii	Gm47743
ENSMUSG00000074418	viii	Pira2-ps2
ENSMUSG00000032375	viii	Aph1b
ENSMUSG00000046321	viii	Hs3st2
ENSMUSG00000109036	viii	2210406H18Rik
ENSMUSG00000032740	viii	Ccdc88a
ENSMUSG00000055485	viii	Soga1
ENSMUSG00000026072	viii	Il1r1
ENSMUSG00000033705	viii	Stard9
ENSMUSG00000057315	viii	Arhgap24
ENSMUSG00000102752	viii	Gm7694
ENSMUSG00000020023	viii	Tmcc3
ENSMUSG00000027555	viii	Car13
ENSMUSG00000032942	viii	Ucp3
ENSMUSG00000026994	viii	Galnt3
ENSMUSG00000031078	viii	Cttn
ENSMUSG00000047793	viii	Sned1
ENSMUSG00000025355	viii	Mmp19
ENSMUSG00000025375	viii	Aatk
ENSMUSG00000037185	viii	Krt80
ENSMUSG00000024511	viii	Rab27b
ENSMUSG00000025044	viii	Msr1
ENSMUSG00000069170	viii	Adgrv1
ENSMUSG00000097296	viii	Gm26532
ENSMUSG00000049409	viii	Prokr1
ENSMUSG00000017969	viii	Ptgis
ENSMUSG00000026548	viii	Slamf9
ENSMUSG00000031563	viii	Wwc2
ENSMUSG00000035095	viii	Fam167a
ENSMUSG00000002059	viii	Rab34
ENSMUSG00000021876	viii	Rnase4
ENSMUSG00000106558	viii	Gm5552
ENSMUSG00000001095	viii	Slc13a2
ENSMUSG00000031387	viii	Renbp
ENSMUSG00000038775	viii	Vill
ENSMUSG00000031458	viii	Coprs
ENSMUSG00000030161	viii	Gabarapl1
ENSMUSG00000013089	viii	Etv5
ENSMUSG00000028917	viii	Plekhm2
ENSMUSG00000048120	viii	Entpd1
ENSMUSG00000070604	viii	Vsig10l
ENSMUSG00000050022	viii	Amz1
ENSMUSG00000024885	viii	Aldh3b1
ENSMUSG00000085761	viii	4930455G09Rik
ENSMUSG00000032860	viii	P2ry2
ENSMUSG00000039760	viii	Il22ra2
ENSMUSG00000026342	viii	Slc35f5
ENSMUSG00000027695	viii	Pld1
ENSMUSG00000062312	viii	Erbb2
ENSMUSG00000022438	viii	Parvb
ENSMUSG00000043017	viii	Ptgir
ENSMUSG00000015846	viii	Rxra
ENSMUSG00000026986	viii	Hnmt
ENSMUSG00000025701	viii	Alox5
ENSMUSG00000055782	viii	Abcd2
ENSMUSG00000031494	viii	Cd209a
ENSMUSG00000049904	viii	Tmem17
ENSMUSG00000046658	viii	Zfp316
ENSMUSG00000021375	viii	Kif13a
ENSMUSG00000032041	viii	Tirap
ENSMUSG00000030341	viii	Tnfrsf1a
ENSMUSG00000056498	viii	Tmem154
ENSMUSG00000022500	viii	Litaf
ENSMUSG00000068566	viii	Myadm
ENSMUSG00000118291	viii	Csf1r-ps
ENSMUSG00000026158	viii	Ogfrl1
ENSMUSG00000024451	viii	Arap3
ENSMUSG00000000320	viii	Alox12
ENSMUSG00000016255	viii	Tubb1
ENSMUSG00000030786	viii	Itgam
ENSMUSG00000016024	viii	Lbp
ENSMUSG00000023993	viii	Treml1
ENSMUSG00000054920	viii	Klhl5
ENSMUSG00000090124	viii	Ugt1a7c
ENSMUSG00000037661	viii	Gpr160
ENSMUSG00000073412	viii	Lst1
ENSMUSG00000070476	viii	Fam217b
ENSMUSG00000029915	viii	Clec5a
ENSMUSG00000071713	viii	Csf2rb
ENSMUSG00000031712	viii	Il15
ENSMUSG00000115869	viii	Gm31814
ENSMUSG00000031438	viii	Rnf128
ENSMUSG00000101585	viii	1600010M07Rik
ENSMUSG00000020774	viii	Aspa
ENSMUSG00000073802	viii	Cdkn2b
ENSMUSG00000038527	viii	C1rl
ENSMUSG00000109291	viii	Gm2814
ENSMUSG00000019990	viii	Pde7b
ENSMUSG00000110235	viii	Gm5086
ENSMUSG00000033768	viii	Nrxn2
ENSMUSG00000025013	viii	Tll2
ENSMUSG00000097585	viii	E230029C05Rik
ENSMUSG00000026193	viii	Fn1
ENSMUSG00000022793	viii	B4galt4
ENSMUSG00000028327	viii	Stra6l
ENSMUSG00000024535	viii	Snx24
ENSMUSG00000042476	viii	Abcb4
ENSMUSG00000087380	viii	2210408F21Rik
ENSMUSG00000046727	viii	Cystm1
ENSMUSG00000040997	viii	Abhd4
ENSMUSG00000053101	viii	Gpr141
ENSMUSG00000095609	viii	Gm21188
ENSMUSG00000114608	viii	Gm36161
ENSMUSG00000059108	viii	Ifitm6
ENSMUSG00000038811	viii	Gngt2
ENSMUSG00000030917	viii	Tmem159
ENSMUSG00000038235	viii	F11r
ENSMUSG00000027165	viii	Iftap
ENSMUSG00000040883	viii	Tmem205
ENSMUSG00000000530	viii	Acvrl1
ENSMUSG00000074417	viii	Pira12
ENSMUSG00000015854	viii	Cd5l
ENSMUSG00000030427	viii	Lilra6
ENSMUSG00000026390	viii	Marco
ENSMUSG00000085881	viii	Gm15912
ENSMUSG00000030223	viii	Ptpro
ENSMUSG00000091996	viii	Smim35
ENSMUSG00000073489	viii	Ifi204
ENSMUSG00000025492	viii	Ifitm3
ENSMUSG00000031824	viii	6430548M08Rik
ENSMUSG00000022667	viii	Cd200r1
ENSMUSG00000063193	viii	Cd300lb
ENSMUSG00000020604	viii	Arsg
ENSMUSG00000031139	viii	Mcf2
ENSMUSG00000034708	viii	Grn
ENSMUSG00000073490	viii	Ifi207
ENSMUSG00000040613	viii	Apobec1
ENSMUSG00000003484	viii	Cyp4f18
ENSMUSG00000044092	viii	C130050O18Rik
ENSMUSG00000006411	viii	Nectin4
ENSMUSG00000081660	viii	Gm11787
ENSMUSG00000025810	viii	Nrp1
ENSMUSG00000056515	viii	Rab31
ENSMUSG00000028497	viii	Hacd4
ENSMUSG00000058818	viii	Pirb
ENSMUSG00000005413	viii	Hmox1
ENSMUSG00000021939	viii	Ctsb
ENSMUSG00000034652	viii	Cd300a
ENSMUSG00000046245	viii	Pilra
ENSMUSG00000035004	viii	Igsf6
ENSMUSG00000000440	viii	Pparg
ENSMUSG00000015568	viii	Lpl
ENSMUSG00000069662	viii	Marcks
ENSMUSG00000035954	viii	Dock4
ENSMUSG00000041202	viii	Pla2g2d
ENSMUSG00000023031	viii	Cela1
ENSMUSG00000027399	viii	Il1a
ENSMUSG00000030579	viii	Tyrobp
ENSMUSG00000074063	viii	Osgin1
ENSMUSG00000042684	viii	Npl
ENSMUSG00000023913	viii	Pla2g7
ENSMUSG00000030187	viii	Klra2
ENSMUSG00000017002	viii	Slpi
ENSMUSG00000059498	viii	Fcgr3
ENSMUSG00000045502	viii	Hcar2
ENSMUSG00000036887	viii	C1qa
ENSMUSG00000036905	viii	C1qb
ENSMUSG00000042770	viii	Hebp1
ENSMUSG00000060703	viii	Cd302
ENSMUSG00000066684	viii	Pilrb1
ENSMUSG00000027253	viii	Lrp4
ENSMUSG00000030737	viii	Slco2b1
ENSMUSG00000025511	viii	Tspan4
ENSMUSG00000026938	viii	Fcna
ENSMUSG00000004359	viii	Spic
ENSMUSG00000023349	viii	Clec4n
ENSMUSG00000026435	viii	Slc45a3
ENSMUSG00000040722	viii	Scamp5
ENSMUSG00000047250	viii	Ptgs1
ENSMUSG00000032915	viii	Adgre4
ENSMUSG00000002103	viii	Acp2
ENSMUSG00000025993	viii	Slc40a1
ENSMUSG00000035448	viii	Ccr3
ENSMUSG00000021190	viii	Lgmn
ENSMUSG00000001128	viii	Cfp
ENSMUSG00000024621	viii	Csf1r
ENSMUSG00000027962	viii	Vcam1
ENSMUSG00000032554	viii	Trf
ENSMUSG00000031903	viii	Pla2g15
ENSMUSG00000030409	viii	Dmpk
ENSMUSG00000005360	viii	Slc1a3
ENSMUSG00000051497	viii	Kcnj16
ENSMUSG00000026712	viii	Mrc1
ENSMUSG00000043832	viii	Clec4a3
ENSMUSG00000081665	viii	Pira1
ENSMUSG00000028517	viii	Plpp3
ENSMUSG00000035459	viii	Stab2
ENSMUSG00000022218	viii	Tgm1
ENSMUSG00000004730	viii	Adgre1
ENSMUSG00000051439	viii	Cd14
ENSMUSG00000037902	viii	Sirpa
ENSMUSG00000072949	viii	Acot1
ENSMUSG00000039115	viii	Itga9
ENSMUSG00000023367	viii	Tmem176a
ENSMUSG00000036585	viii	Fgf1
ENSMUSG00000043300	viii	B3galnt1
ENSMUSG00000030147	viii	Clec4b1
ENSMUSG00000015947	viii	Fcgr1
ENSMUSG00000051682	viii	Treml4
ENSMUSG00000036362	viii	P2ry13
ENSMUSG00000041707	viii	Tmem273
ENSMUSG00000030474	viii	Siglece
ENSMUSG00000024672	viii	Ms4a7
ENSMUSG00000039217	viii	Il18
ENSMUSG00000045551	viii	Fpr1
ENSMUSG00000036634	viii	Mag
ENSMUSG00000030148	viii	Clec4a2
ENSMUSG00000002108	viii	Nr1h3
ENSMUSG00000003283	viii	Hck
ENSMUSG00000033777	viii	Tlr13
ENSMUSG00000030559	viii	Rab38
ENSMUSG00000074342	viii	I830077J02Rik
ENSMUSG00000000149	viii	Gna12
ENSMUSG00000053063	viii	Clec12a
ENSMUSG00000035493	viii	Tgfbi
ENSMUSG00000029455	viii	Aldh2
ENSMUSG00000042228	viii	Lyn
ENSMUSG00000038578	viii	Susd1
ENSMUSG00000004508	viii	Gab2
ENSMUSG00000029925	viii	Tbxas1
ENSMUSG00000090185	viii	Gm15523
ENSMUSG00000066682	viii	Pilrb2
ENSMUSG00000058715	viii	Fcer1g
ENSMUSG00000102418	viii	Sh2d1b1
ENSMUSG00000080917	viii	Pira2-ps1
ENSMUSG00000064039	viii	Ccr1l1
ENSMUSG00000020227	viii	Irak3
ENSMUSG00000009621	viii	Vav2
ENSMUSG00000026473	viii	Glul
ENSMUSG00000030064	viii	Frmd4b
ENSMUSG00000030560	viii	Ctsc
ENSMUSG00000039005	viii	Tlr4
ENSMUSG00000055435	viii	Maf
ENSMUSG00000020709	viii	Adap2
ENSMUSG00000040249	viii	Lrp1
ENSMUSG00000043940	viii	Wdfy3
ENSMUSG00000064373	viii	Selenop
ENSMUSG00000021806	viii	Nid2
ENSMUSG00000000958	viii	Slc7a7
ENSMUSG00000010307	viii	Tmem86a
ENSMUSG00000040616	viii	Tmem51
ENSMUSG00000026480	viii	Ncf2
ENSMUSG00000037820	viii	Tgm2
ENSMUSG00000025950	viii	Idh1
ENSMUSG00000033192	viii	Lpcat2
ENSMUSG00000026177	viii	Slc11a1
ENSMUSG00000031613	viii	Hpgd
ENSMUSG00000060147	viii	Serpinb6a
ENSMUSG00000034947	viii	Tmem106a
ENSMUSG00000037966	viii	Ninj1
ENSMUSG00000006356	viii	Crip2
ENSMUSG00000018774	viii	Cd68
ENSMUSG00000089669	viii	Tnfsf13
ENSMUSG00000049037	viii	Clec4a1
ENSMUSG00000017057	viii	Il13ra1
ENSMUSG00000034853	viii	Acot11
ENSMUSG00000081534	viii	Slc48a1
ENSMUSG00000056220	viii	Pla2g4a
ENSMUSG00000048498	viii	Cd300e
ENSMUSG00000036641	viii	Ccdc148
ENSMUSG00000037306	viii	Man1c1
ENSMUSG00000090665	viii	Gad1-ps
ENSMUSG00000028874	viii	Fgr
ENSMUSG00000004709	viii	Cd244a
ENSMUSG00000024730	viii	Ms4a8a
ENSMUSG00000030084	viii	Plxna1
ENSMUSG00000086507	viii	Adap2os
ENSMUSG00000001036	viii	Epn2
ENSMUSG00000021573	viii	Tppp
ENSMUSG00000109089	viii	4833411C07Rik
ENSMUSG00000044206	viii	Vsig4
ENSMUSG00000039976	viii	Tbc1d16
ENSMUSG00000043415	viii	Otud1
ENSMUSG00000020032	viii	Nuak1
ENSMUSG00000038085	viii	Cnbd2
ENSMUSG00000031618	viii	Nr3c2
ENSMUSG00000070709	viii	Zfp974
ENSMUSG00000032177	viii	Pde4a
ENSMUSG00000032207	viii	Lipc
ENSMUSG00000027318	viii	Adam33
ENSMUSG00000109854	viii	Gm45345
ENSMUSG00000021640	viii	Naip1
ENSMUSG00000038370	viii	Pcp4l1
ENSMUSG00000009545	viii	Kcnq1
ENSMUSG00000025867	viii	Cplx2
ENSMUSG00000120328	viii	Gm56592
ENSMUSG00000046006	viii	Gapt
ENSMUSG00000046546	viii	Fam43a
ENSMUSG00000090326	viii	Dthd1
ENSMUSG00000052616	viii	Terb1
ENSMUSG00000022305	viii	Lrp12
ENSMUSG00000109555	viii	Gm44891
ENSMUSG00000028550	viii	Atg4c
ENSMUSG00000058056	viii	Palld
ENSMUSG00000041797	viii	Abca9
ENSMUSG00000054640	viii	Slc8a1
ENSMUSG00000024986	viii	Hhex
ENSMUSG00000062464	viii	Cyp4f37
ENSMUSG00000022607	viii	Ptk2
ENSMUSG00000027995	viii	Tlr2
ENSMUSG00000112539	viii	Gm40787
ENSMUSG00000038936	viii	Sccpdh
ENSMUSG00000031012	viii	Cask
ENSMUSG00000029581	viii	Fscn1
ENSMUSG00000035273	viii	Hpse
ENSMUSG00000049988	viii	Lrrc25
ENSMUSG00000025171	viii	Ubtd1
ENSMUSG00000024899	viii	Papss2
ENSMUSG00000022237	viii	Ankrd33b
ENSMUSG00000062373	viii	Tmem65
ENSMUSG00000023915	viii	Tnfrsf21
ENSMUSG00000074622	viii	Mafb
ENSMUSG00000027333	viii	Smox
ENSMUSG00000030785	viii	Cox6a2
ENSMUSG00000017466	viii	Timp2
ENSMUSG00000045404	viii	Kcnk13
ENSMUSG00000040829	viii	Zmynd15
ENSMUSG00000022892	viii	App
ENSMUSG00000039691	viii	Tspan10
ENSMUSG00000037972	viii	Snn
ENSMUSG00000038371	viii	Sbf2
ENSMUSG00000108456	viii	4732496C06Rik
ENSMUSG00000032046	viii	Abhd12
ENSMUSG00000053559	viii	Smagp
ENSMUSG00000030272	viii	Camk1
ENSMUSG00000020773	viii	Trim47
ENSMUSG00000044952	viii	Kctd21
ENSMUSG00000030465	viii	Psd3
ENSMUSG00000029096	viii	Htra3
ENSMUSG00000027765	viii	P2ry1
ENSMUSG00000044562	viii	Rasip1
ENSMUSG00000024754	viii	Cemip2
ENSMUSG00000096188	viii	Cmtm4
ENSMUSG00000036103	viii	Colec12
ENSMUSG00000022389	viii	Tef
ENSMUSG00000004105	viii	Angptl2
ENSMUSG00000035041	viii	Creb3l3
ENSMUSG00000088900	viii	Gm25436
ENSMUSG00000018012	viii	Rac3
ENSMUSG00000049119	viii	Fam110b
ENSMUSG00000095298	viii	Gm12407
ENSMUSG00000024043	viii	Arhgap28
ENSMUSG00000001768	viii	Rin2
ENSMUSG00000026566	viii	Mpzl1
ENSMUSG00000037217	viii	Syn1
ENSMUSG00000042743	viii	Sgtb
ENSMUSG00000029781	viii	Fkbp9
ENSMUSG00000041945	viii	Mfsd9
ENSMUSG00000031596	viii	Slc7a2
ENSMUSG00000035283	viii	Adrb1
ENSMUSG00000034664	viii	Itga2b
ENSMUSG00000022037	viii	Clu
ENSMUSG00000065987	viii	Cd209b
ENSMUSG00000029361	viii	Nos1
ENSMUSG00000070960	viii	Gm19680
ENSMUSG00000006930	viii	Hap1
ENSMUSG00000023079	viii	Gtf2ird1
ENSMUSG00000021186	viii	Fbln5
ENSMUSG00000047502	viii	Mroh7
ENSMUSG00000049723	viii	Mmp12
ENSMUSG00000054675	viii	Tmem119
ENSMUSG00000059277	viii	R74862
ENSMUSG00000022951	viii	Rcan1
ENSMUSG00000087168	viii	Gm15983
ENSMUSG00000028456	viii	Unc13b
ENSMUSG00000041912	viii	Tdrkh
ENSMUSG00000032802	viii	Srxn1
ENSMUSG00000035498	viii	Cdcp1
ENSMUSG00000090891	viii	D6Ertd527e
ENSMUSG00000032101	viii	Ddx25
ENSMUSG00000059639	viii	Clec4a4
ENSMUSG00000041633	viii	Kctd12b
ENSMUSG00000032827	viii	Ppp1r9a
ENSMUSG00000026829	viii	Gbgt1
ENSMUSG00000103406	viii	Gm5541
ENSMUSG00000108861	viii	5930435M05Rik
ENSMUSG00000015968	viii	Cacna1d
ENSMUSG00000015243	viii	Abca1
ENSMUSG00000039585	viii	Myo9a
ENSMUSG00000103995	viii	5730488B01Rik
ENSMUSG00000108897	viii	Gm44861
ENSMUSG00000022957	viii	Itsn1
ENSMUSG00000078942	viii	Naip6
ENSMUSG00000037922	viii	Bank1
ENSMUSG00000023274	viii	Cd4
ENSMUSG00000120576	viii	Gm31940
ENSMUSG00000032220	viii	Myo1e
ENSMUSG00000005583	viii	Mef2c
ENSMUSG00000006235	viii	Epor
ENSMUSG00000095325	viii	Zfp870
ENSMUSG00000000127	viii	Fer
ENSMUSG00000004151	viii	Etv1
ENSMUSG00000029553	viii	Tfec
ENSMUSG00000021411	viii	Pxdc1
ENSMUSG00000025433	viii	Crisp3
ENSMUSG00000022425	viii	Enpp2
ENSMUSG00000089956	viii	Gm16553
ENSMUSG00000008193	viii	Spib
ENSMUSG00000061132	viii	Blnk
ENSMUSG00000026616	viii	Cr2
ENSMUSG00000059479	viii	B3gnt8
ENSMUSG00000014030	viii	Pax5
ENSMUSG00000040899	viii	Ccr6
ENSMUSG00000028469	viii	Npr2
ENSMUSG00000090222	ix	Ifi203-ps
ENSMUSG00000033808	ix	Tmem87a
ENSMUSG00000082399	ix	Gm14036
ENSMUSG00000026535	ix	Ifi202b
ENSMUSG00000094497	ix	Gm8210
ENSMUSG00000083833	ix	Gm13841
ENSMUSG00000120284	ix	Gm56714
ENSMUSG00000063696	ix	Gm8730
ENSMUSG00000081434	ix	Gm14165
ENSMUSG00000024420	ix	Zfp521
ENSMUSG00000109379	ix	Gm44550
ENSMUSG00000097709	ix	2810429I04Rik
ENSMUSG00000069607	ix	Cd300ld3
ENSMUSG00000089722	ix	Cd300ld5
ENSMUSG00000120903	ix	Gm57143
ENSMUSG00000020681	ix	Ace
ENSMUSG00000021476	x	Habp4
ENSMUSG00000090100	x	Ttbk2
ENSMUSG00000022799	x	Arhgap31
ENSMUSG00000029149	x	Krtcap3
ENSMUSG00000011832	x	Evi5l
ENSMUSG00000107499	x	Ccdc142
ENSMUSG00000021775	x	Nr1d2
ENSMUSG00000033949	x	Trim36
ENSMUSG00000110386	x	Gm42031
ENSMUSG00000087131	x	Gm16152
ENSMUSG00000024437	x	Gm8615
ENSMUSG00000111740	x	Gm49783
ENSMUSG00000110537	x	Gm4316
ENSMUSG00000102211	x	Gm37490
ENSMUSG00000054135	x	A430110L20Rik
ENSMUSG00000025321	x	Itgb8
ENSMUSG00000055629	x	B4galnt4
ENSMUSG00000097368	x	Gm10390
ENSMUSG00000027978	x	Prss12
ENSMUSG00000072294	x	Klf12
ENSMUSG00000089827	x	1700023H06Rik
ENSMUSG00000084860	x	2610204G07Rik
ENSMUSG00000087242	x	C78197
ENSMUSG00000097974	x	Gm10605
ENSMUSG00000100801	x	Gm15459
ENSMUSG00000105263	x	Gm42427
ENSMUSG00000103953	x	Gm29718
ENSMUSG00000072476	x	Gm9008
ENSMUSG00000025348	x	Itga7
ENSMUSG00000108238	x	Gm43984
ENSMUSG00000019737	x	Syne4
ENSMUSG00000022610	x	Mapk12
ENSMUSG00000038074	x	Fkbp14
ENSMUSG00000102960	x	Gm37943
ENSMUSG00000026399	x	Cd55
ENSMUSG00000059495	x	Arhgef12
ENSMUSG00000004552	x	Ctse
ENSMUSG00000101964	x	Gm28693
ENSMUSG00000040187	x	Arntl2
ENSMUSG00000082145	x	Gm12312
ENSMUSG00000051906	x	Cd209f
ENSMUSG00000033770	x	Clcnka
ENSMUSG00000040102	x	Klhl42
ENSMUSG00000076676	x	Ighv12-3
ENSMUSG00000050550	x	Gm11868
ENSMUSG00000027776	x	Il12a
ENSMUSG00000104822	x	Gm42967
ENSMUSG00000059839	x	Zfp874b
ENSMUSG00000028989	x	Angptl7
ENSMUSG00000002475	x	Abhd3
ENSMUSG00000022197	x	Pdzd2
ENSMUSG00000039193	x	Nlrc4
ENSMUSG00000121013	x	Gm57304
ENSMUSG00000003418	x	St8sia6
ENSMUSG00000025754	x	Agbl1
ENSMUSG00000057337	x	Chst3
ENSMUSG00000047648	x	Fbxo30
ENSMUSG00000017774	x	Myo1c
ENSMUSG00000057098	x	Ebf1
ENSMUSG00000037071	x	Scd1
ENSMUSG00000014453	x	Blk
ENSMUSG00000001995	x	Sipa1l2
ENSMUSG00000022416	x	Cacna1i
ENSMUSG00000026447	x	Pik3c2b
ENSMUSG00000109656	x	Gm45548
ENSMUSG00000031132	x	Cd40lg
ENSMUSG00000105128	x	Gm42870
ENSMUSG00000032327	x	Stra6
ENSMUSG00000112063	x	Gm32220
ENSMUSG00000105646	x	Gm30211
ENSMUSG00000005540	x	Fcer2a
ENSMUSG00000002007	x	Srpk3
ENSMUSG00000030724	x	Cd19
ENSMUSG00000030577	x	Cd22
ENSMUSG00000090215	x	Trim34b
ENSMUSG00000109684	x	Gm45745
ENSMUSG00000030966	x	Trim21
ENSMUSG00000108866	x	Gm35082
ENSMUSG00000108068	x	Gm44075

## Sheet: WT-8wk vs WT-UI - Fig. 2d
GeneID	log2FoldChange	pvalue	padj	Symbol
ENSMUSG00000054072	3.25829	5.49112e-37	9.84228e-33	Iigp1
ENSMUSG00000004552	-3.46465	5.51169e-24	4.10298e-20	Ctse
ENSMUSG00000105096	2.77542	6.86729e-24	4.10298e-20	Gbp10
ENSMUSG00000068606	6.48324	1.17083e-23	5.24649e-20	Gm4841
ENSMUSG00000000157	23.0279	1.83793e-21	5.4905e-18	Itgb2l
ENSMUSG00000015437	4.68332	5.51705e-18	1.41268e-14	Gzmb
ENSMUSG00000026011	2.14948	2.4059e-17	5.39041e-14	Ctla4
ENSMUSG00000112627	1.83083	1.85749e-16	3.69929e-13	4933412E12Rik
ENSMUSG00000021675	3.31081	2.33033e-16	4.17688e-13	F2rl2
ENSMUSG00000082292	1.62856	2.93917e-16	4.78924e-13	Gm12250
ENSMUSG00000075602	3.20388	3.77705e-16	5.64166e-13	Ly6a
ENSMUSG00000026399	-1.50349	9.9205e-16	1.27011e-12	Cd55
ENSMUSG00000023045	4.49898	9.3989e-16	1.27011e-12	Soat2
ENSMUSG00000028943	2.51594	7.36026e-15	8.79501e-12	Espn
ENSMUSG00000030114	4.04268	1.11637e-14	1.25062e-11	Klrg1
ENSMUSG00000078853	1.58276	3.55149e-14	3.5365e-11	Igtp
ENSMUSG00000000791	2.20723	4.62889e-14	4.36675e-11	Il12rb1
ENSMUSG00000042385	4.9234	8.02273e-14	7.18997e-11	Gzmk
ENSMUSG00000024793	1.69943	1.90924e-13	1.62958e-10	Tnfrsf25
ENSMUSG00000050232	1.93358	4.33145e-13	3.37552e-10	Cxcr3
ENSMUSG00000048852	2.2284	1.14941e-12	8.24083e-10	Gm12185
ENSMUSG00000022586	4.80509	1.12814e-12	8.24083e-10	Ly6i
ENSMUSG00000018930	3.65009	1.44799e-12	9.98222e-10	Ccl4
ENSMUSG00000022100	-2.15299	2.0302e-12	1.34775e-09	Xpo7
ENSMUSG00000028270	1.50955	2.71506e-12	1.73803e-09	Gbp2
ENSMUSG00000001025	2.95835	3.18539e-12	1.96879e-09	S100a6
ENSMUSG00000104713	1.59911	4.63731e-12	2.77064e-09	Gbp6
ENSMUSG00000026311	-2.69872	5.96137e-12	3.33911e-09	Asb1
ENSMUSG00000054206	3.74341	6.26264e-12	3.40156e-09	Gzmm
ENSMUSG00000026068	2.39941	1.30796e-11	6.69823e-09	Il18rap
ENSMUSG00000022126	6.13657	1.67545e-11	8.34189e-09	Acod1
ENSMUSG00000067577	2.2686	1.89594e-11	9.18454e-09	A430093F15Rik
ENSMUSG00000029417	2.33737	2.06182e-11	9.7253e-09	Cxcl9
ENSMUSG00000115681	-5.65098	2.6085e-11	1.19884e-08	Gm2682
ENSMUSG00000071552	2.61229	3.09956e-11	1.33474e-08	Tigit
ENSMUSG00000074170	5.61695	4.02156e-11	1.67634e-08	Plekhf1
ENSMUSG00000066363	3.19255	6.19632e-11	2.46806e-08	Serpina3f
ENSMUSG00000086564	1.64664	6.95058e-11	2.70831e-08	Cd101
ENSMUSG00000055170	3.41377	2.68638e-10	9.65267e-08	Ifng
ENSMUSG00000000817	2.76613	3.12949e-10	1.07871e-07	Fasl
ENSMUSG00000005824	2.33138	4.96402e-10	1.67878e-07	Tnfsf14
ENSMUSG00000049916	3.56462	8.46773e-10	2.66273e-07	2610318N02Rik
ENSMUSG00000063903	3.52424	1.10192e-09	3.2918e-07	Klk1
ENSMUSG00000041481	2.04427	3.14164e-09	8.9382e-07	Serpina3g
ENSMUSG00000029822	2.5091	5.42811e-09	1.52021e-06	Osbpl3
ENSMUSG00000021453	2.02535	6.62565e-09	1.79936e-06	Gadd45g
ENSMUSG00000043931	1.59145	6.77969e-09	1.81372e-06	Gimap7
ENSMUSG00000029102	7.77896	9.21126e-09	2.32715e-06	Hgfac
ENSMUSG00000098934	1.55807	1.04455e-08	2.60036e-06	Gvin-ps4
ENSMUSG00000035042	2.67797	1.39652e-08	3.41167e-06	Ccl5
ENSMUSG00000045973	-1.66806	1.47064e-08	3.51464e-06	Slc25a51
ENSMUSG00000092021	2.21636	1.56984e-08	3.70233e-06	Gbp11
ENSMUSG00000020407	5.02702	1.60648e-08	3.73956e-06	Upp1
ENSMUSG00000022584	2.61782	1.7184e-08	3.94879e-06	Ly6c2
ENSMUSG00000099241	1.58361	1.80779e-08	4.10163e-06	Gvin-ps2
ENSMUSG00000039745	-3.49236	1.90407e-08	4.26608e-06	Htatip2
ENSMUSG00000000318	3.54045	1.9863e-08	4.39536e-06	Clec10a
ENSMUSG00000043953	2.16055	2.46059e-08	5.31368e-06	Ccrl2
ENSMUSG00000023926	-10.9726	2.74542e-08	5.8582e-06	Rhag
ENSMUSG00000029561	3.2417	2.78504e-08	5.87284e-06	Oasl2
ENSMUSG00000034855	2.22211	2.97504e-08	6.12928e-06	Cxcl10
ENSMUSG00000030107	1.52789	3.50134e-08	7.10004e-06	Usp18
ENSMUSG00000087060	4.15694	3.63486e-08	7.23903e-06	Eldr
ENSMUSG00000117465	-4.65318	4.19074e-08	8.16465e-06	Gm49980
ENSMUSG00000021476	-2.34597	4.56532e-08	8.70519e-06	Habp4
ENSMUSG00000079362	1.66791	4.89572e-08	9.14072e-06	Gm43302
ENSMUSG00000021250	3.24506	5.53647e-08	1.02305e-05	Fos
ENSMUSG00000121499	5.16825	6.14972e-08	1.12477e-05	Ly6a2
ENSMUSG00000015354	-2.97396	6.66601e-08	1.20688e-05	Pcolce2
ENSMUSG00000037418	1.99069	7.37327e-08	1.29567e-05	Best1
ENSMUSG00000050550	-3.94944	7.44882e-08	1.29624e-05	Gm11868
ENSMUSG00000024588	-2.24814	7.89313e-08	1.36035e-05	Fech
ENSMUSG00000076752	2.65797	8.00099e-08	1.36581e-05	Trgc2
ENSMUSG00000001249	-4.40081	8.44105e-08	1.42733e-05	Hpn
ENSMUSG00000058427	6.12023	9.09349e-08	1.50918e-05	Cxcl2
ENSMUSG00000056054	4.34056	9.499e-08	1.54782e-05	S100a8
ENSMUSG00000040298	7.10125	9.80008e-08	1.57069e-05	Btbd16
ENSMUSG00000116380	2.26452	9.81464e-08	1.57069e-05	Gm39556
ENSMUSG00000026285	2.1042	1.17756e-07	1.82727e-05	Pdcd1
ENSMUSG00000033470	2.19826	1.19204e-07	1.82727e-05	Cysltr2
ENSMUSG00000028885	2.21665	1.40973e-07	2.14135e-05	Smpdl3b
ENSMUSG00000066362	2.12802	1.67187e-07	2.49722e-05	Rps13-ps1
ENSMUSG00000051354	1.95618	2.2753e-07	3.31565e-05	Samd3
ENSMUSG00000083022	2.31248	2.31799e-07	3.35061e-05	Rps15a-ps6
ENSMUSG00000030413	2.06755	2.48594e-07	3.55364e-05	Pglyrp1
ENSMUSG00000028214	1.64188	2.61303e-07	3.65906e-05	Gem
ENSMUSG00000033538	1.58819	2.77023e-07	3.84912e-05	Casp4
ENSMUSG00000020439	2.8963	2.80692e-07	3.87009e-05	Smtn
ENSMUSG00000029866	-9.95596	2.8673e-07	3.92317e-05	Kel
ENSMUSG00000023467	3.11591	3.03007e-07	4.08354e-05	Tulp2
ENSMUSG00000110570	2.30441	3.20218e-07	4.22029e-05	Gm45778
ENSMUSG00000071176	1.76318	3.25942e-07	4.26437e-05	Arhgef10
ENSMUSG00000079227	1.81597	3.96893e-07	5.11792e-05	Ccr5
ENSMUSG00000016529	7.47237	4.08196e-07	5.1895e-05	Il10
ENSMUSG00000014543	2.86062	4.68262e-07	5.91066e-05	Klra17
ENSMUSG00000050445	8.28367	5.24095e-07	6.52352e-05	Cyp8b1
ENSMUSG00000026950	2.18866	5.68539e-07	7.02793e-05	Neb
ENSMUSG00000081087	2.51071	5.82324e-07	7.14902e-05	Rps15a-ps7
ENSMUSG00000026421	-1.58447	6.0966e-07	7.4337e-05	Csrp1
ENSMUSG00000104765	6.73441	6.31556e-07	7.64866e-05	Gm43058
ENSMUSG00000097113	1.75098	6.38211e-07	7.67738e-05	Gm19705
ENSMUSG00000058755	1.61801	6.76764e-07	8.08688e-05	Osm
ENSMUSG00000116957	2.1137	6.98561e-07	8.23751e-05	Gm34680
ENSMUSG00000034248	-2.27299	7.73544e-07	9.00325e-05	Slc25a37
ENSMUSG00000037129	4.97389	8.08654e-07	9.19298e-05	Tmprss13
ENSMUSG00000103953	-6.05259	9.2218e-07	0.000103307	Gm29718
ENSMUSG00000027611	1.89124	9.45057e-07	0.000105212	Procr
ENSMUSG00000111913	4.84804	9.62556e-07	0.000106499	Gm49751
ENSMUSG00000045636	2.50973	9.83665e-07	0.000106856	Mtus1
ENSMUSG00000116220	1.84188	1.02267e-06	0.000110423	A430088P11Rik
ENSMUSG00000063388	4.59755	1.11041e-06	0.00011777	BC023105
ENSMUSG00000112023	3.11236	1.21094e-06	0.000126929	Lilrb4b
ENSMUSG00000110902	2.26878	1.34804e-06	0.000138864	Gm33104
ENSMUSG00000031397	6.96816	1.38345e-06	0.000141697	Tktl1
ENSMUSG00000063177	3.56514	1.44552e-06	0.000147213	Klk1b27
ENSMUSG00000051504	2.16436	1.68015e-06	0.000169185	Siglech
ENSMUSG00000112808	1.81652	1.97713e-06	0.000194714	Gm4739
ENSMUSG00000037124	-8.47678	2.43458e-06	0.00023716	Trim58
ENSMUSG00000106269	6.64257	2.626e-06	0.000253056	4930580E04Rik
ENSMUSG00000052684	2.0797	2.65146e-06	0.000254143	Jun
ENSMUSG00000006235	-2.70242	2.85191e-06	0.00026904	Epor
ENSMUSG00000044258	2.1202	2.84636e-06	0.00026904	Ctla2a
ENSMUSG00000051359	2.82352	2.8257e-06	0.00026904	Ncald
ENSMUSG00000006356	-1.88043	3.19788e-06	0.000296988	Crip2
ENSMUSG00000040204	1.81097	3.47857e-06	0.000319743	Pclaf
ENSMUSG00000069515	1.93484	3.53332e-06	0.000323118	Lyz1
ENSMUSG00000038871	-2.18345	3.68291e-06	0.000335089	Bpgm
ENSMUSG00000108090	1.94794	4.01171e-06	0.00035597	Gm6637
ENSMUSG00000020802	-1.87774	4.00596e-06	0.00035597	Ube2o
ENSMUSG00000067297	2.55104	3.98115e-06	0.00035597	Ifit1bl2
ENSMUSG00000059040	-2.15502	4.06781e-06	0.000359169	Eno1b
ENSMUSG00000029322	1.67297	4.22571e-06	0.000369472	Plac8
ENSMUSG00000032411	-2.04101	4.442e-06	0.000382781	Tfdp2
ENSMUSG00000029163	1.97413	4.70438e-06	0.000395874	Emilin1
ENSMUSG00000023960	1.60789	4.7998e-06	0.000402017	Enpp5
ENSMUSG00000121505	7.19622	4.93752e-06	0.000409723	Gm4956
ENSMUSG00000060044	-2.13805	5.24052e-06	0.000428909	Tmem26
ENSMUSG00000065176	2.97387	5.22056e-06	0.000428909	Rnu12
ENSMUSG00000025330	2.55889	5.38092e-06	0.000436414	Padi4
ENSMUSG00000022440	3.26542	6.01661e-06	0.000481436	C1qtnf6
ENSMUSG00000062373	-1.76674	6.23954e-06	0.000497056	Tmem65
ENSMUSG00000118051	7.0328	6.39671e-06	0.000507322	Gm8714
ENSMUSG00000056071	3.98085	6.69585e-06	0.000528707	S100a9
ENSMUSG00000054672	3.08793	7.49731e-06	0.000581739	Scart2
ENSMUSG00000047648	-2.25242	7.47026e-06	0.000581739	Fbxo30
ENSMUSG00000030159	-3.45617	7.70705e-06	0.000595436	Clec1b
ENSMUSG00000015981	6.33215	7.75013e-06	0.000596194	Stk32c
ENSMUSG00000097662	5.43101	7.95756e-06	0.000606941	Gm2093
ENSMUSG00000022651	3.98784	8.0577e-06	0.000611976	Retnlg
ENSMUSG00000002985	-1.81445	8.33202e-06	0.000627492	Apoe
ENSMUSG00000031170	-9.0032	9.09105e-06	0.00067895	Slc38a5
ENSMUSG00000038085	-2.90069	9.25929e-06	0.000688645	Cnbd2
ENSMUSG00000070369	-2.05849	9.41801e-06	0.000697556	Itgad
ENSMUSG00000022057	-1.65708	9.48288e-06	0.00069947	Adamdec1
ENSMUSG00000017466	-1.9819	9.60151e-06	0.000705318	Timp2
ENSMUSG00000083833	-3.86674	9.70823e-06	0.000709068	Gm13841
ENSMUSG00000025511	-1.68375	9.73169e-06	0.000709068	Tspan4
ENSMUSG00000095514	3.73477	9.77393e-06	0.000709262	D13Ertd608e
ENSMUSG00000003545	2.06949	1.04696e-05	0.000750628	Fosb
ENSMUSG00000094088	3.18676	1.15151e-05	0.000822296	Ighv1-64
ENSMUSG00000034449	-1.80342	1.1743e-05	0.000831942	Dhrs11
ENSMUSG00000026822	4.38325	1.23054e-05	0.00086194	Lcn2
ENSMUSG00000006611	-1.51863	1.23588e-05	0.00086194	Hfe
ENSMUSG00000064193	-1.68528	1.24961e-05	0.000868139	Gm4735
ENSMUSG00000094497	-4.0831	1.27903e-05	0.000881742	Gm8210
ENSMUSG00000037872	-5.90168	1.29038e-05	0.000886161	Ackr1
ENSMUSG00000053886	-7.16266	1.31737e-05	0.000894416	Sh2d4a
ENSMUSG00000024659	2.46425	1.31163e-05	0.000894416	Anxa1
ENSMUSG00000028613	2.50686	1.34502e-05	0.000909744	Lrp8
ENSMUSG00000033427	3.38167	1.35707e-05	0.000911017	Upb1
ENSMUSG00000086083	3.95291	1.35666e-05	0.000911017	Gm15829
ENSMUSG00000070304	2.29189	1.38382e-05	0.000925504	Scn2b
ENSMUSG00000020808	3.26281	1.39083e-05	0.000926741	Pimreg
ENSMUSG00000031132	-1.72365	1.40539e-05	0.000928132	Cd40lg
ENSMUSG00000112230	1.98374	1.40023e-05	0.000928132	Ifngas1
ENSMUSG00000120131	6.12225	1.41045e-05	0.000928132	Gm56844
ENSMUSG00000027313	4.89131	1.46086e-05	0.000952159	Chac1
ENSMUSG00000029816	1.92856	1.49895e-05	0.000966443	Gpnmb
ENSMUSG00000039253	-3.05097	1.52167e-05	0.000970617	Fn3krp
ENSMUSG00000099696	-2.26773	1.55673e-05	0.000982492	2900052N01Rik
ENSMUSG00000097569	3.84296	1.59828e-05	0.000998173	Gm26640
ENSMUSG00000035148	5.33563	1.63009e-05	0.0010145	Gpr33
ENSMUSG00000100801	-1.64233	1.64744e-05	0.00102176	Gm15459
ENSMUSG00000091993	2.74461	1.66138e-05	0.00102685	B930036N10Rik
ENSMUSG00000074923	6.04974	1.67564e-05	0.0010321	Pak6
ENSMUSG00000095079	2.50327	1.74557e-05	0.00106783	Igha
ENSMUSG00000114390	-6.87666	1.79986e-05	0.0010973	1700062C10Rik
ENSMUSG00000030782	-6.78671	1.91316e-05	0.00115849	Tgfb1i1
ENSMUSG00000073555	2.23829	1.91225e-05	0.00115849	Gm4951
ENSMUSG00000054046	7.01855	2.026e-05	0.00121859	Klk13
ENSMUSG00000025584	-1.80284	2.1336e-05	0.00125386	Pde8a
ENSMUSG00000034177	1.58047	2.12197e-05	0.00125386	Rnf43
ENSMUSG00000032915	-2.14725	2.22125e-05	0.00129686	Adgre4
ENSMUSG00000046908	2.87	2.26749e-05	0.00131921	Ltb4r1
ENSMUSG00000005800	4.16088	2.29667e-05	0.00131985	Mmp8
ENSMUSG00000022768	5.64272	2.29194e-05	0.00131985	Ccdc116
ENSMUSG00000036353	-1.93119	2.3811e-05	0.00135488	P2ry12
ENSMUSG00000028716	-3.47542	2.44179e-05	0.00138502	Pdzk1ip1
ENSMUSG00000095197	2.86269	2.48785e-05	0.00140226	Ighv1-59
ENSMUSG00000024730	-2.64205	2.49566e-05	0.00140226	Ms4a8a
ENSMUSG00000030208	2.96319	2.50656e-05	0.00140399	Emp1
ENSMUSG00000026490	-7.43186	2.75857e-05	0.00151671	Cdc42bpa
ENSMUSG00000084279	1.74997	2.75857e-05	0.00151671	Gm13232
ENSMUSG00000076757	1.96217	2.77346e-05	0.00152023	Trgc4
ENSMUSG00000081671	1.71135	2.80255e-05	0.00152684	Gm13167
ENSMUSG00000026938	-1.86357	2.88058e-05	0.00156459	Fcna
ENSMUSG00000025150	-3.44313	2.90714e-05	0.00157425	Cbr2
ENSMUSG00000079018	1.9905	2.95512e-05	0.00158585	Ly6c1
ENSMUSG00000023079	-1.87065	2.97802e-05	0.00159338	Gtf2ird1
ENSMUSG00000084806	1.533	3.07378e-05	0.00163971	Gm15232
ENSMUSG00000026475	2.07118	3.23353e-05	0.00171067	Rgs16
ENSMUSG00000027718	5.84364	3.23388e-05	0.00171067	Il21
ENSMUSG00000048480	7.32072	3.40466e-05	0.00178959	Cxcr1
ENSMUSG00000086037	3.52781	3.51537e-05	0.00183701	Gm16085
ENSMUSG00000033295	3.61217	3.819e-05	0.00197838	Ptprf
ENSMUSG00000022218	-1.53125	3.95054e-05	0.00202884	Tgm1
ENSMUSG00000037535	2.91075	4.12232e-05	0.00208137	1700021A07Rik
ENSMUSG00000118669	-2.20623	4.11518e-05	0.00208137	Arvcf
ENSMUSG00000095865	2.01494	4.27065e-05	0.00213819	Gm13237
ENSMUSG00000017737	2.79549	4.57989e-05	0.00227993	Mmp9
ENSMUSG00000030878	-2.3527	4.73509e-05	0.00233883	Cdr2
ENSMUSG00000047250	-1.78918	4.74999e-05	0.00233898	Ptgs1
ENSMUSG00000089942	-1.90476	4.89657e-05	0.00240455	Pira2
ENSMUSG00000024044	-2.02878	4.93966e-05	0.00241723	Epb41l3
ENSMUSG00000112148	2.36468	5.20689e-05	0.00251582	Lilrb4a
ENSMUSG00000038357	5.09124	5.20895e-05	0.00251582	Camp
ENSMUSG00000019312	2.1522	5.22141e-05	0.00251582	Grb7
ENSMUSG00000094027	3.06537	5.22112e-05	0.00251582	Gm21762
ENSMUSG00000120890	1.97146	5.28084e-05	0.00253764	Gm56665
ENSMUSG00000021792	-1.79719	5.56848e-05	0.00261967	Prxl2a
ENSMUSG00000020865	-2.44985	5.5585e-05	0.00261967	Abcc3
ENSMUSG00000024424	3.04711	5.55295e-05	0.00261967	Ttc39c
ENSMUSG00000035186	1.87365	5.66137e-05	0.00264946	Ubd
ENSMUSG00000112621	-6.45423	5.70017e-05	0.00265426	Gm5173
ENSMUSG00000103261	5.20131	5.79393e-05	0.00269043	Gm36981
ENSMUSG00000027360	3.03384	5.91022e-05	0.00273733	Hdc
ENSMUSG00000033808	-1.63769	6.0924e-05	0.00279284	Tmem87a
ENSMUSG00000013921	6.67886	6.13156e-05	0.00279714	Clip3
ENSMUSG00000020826	5.75963	6.13298e-05	0.00279714	Nos2
ENSMUSG00000032484	4.45991	6.20149e-05	0.00281406	Ngp
ENSMUSG00000027765	-6.21091	6.28677e-05	0.00284224	P2ry1
ENSMUSG00000032261	-1.77285	6.43822e-05	0.00288496	Sh3bgrl2
ENSMUSG00000027200	-1.96215	6.46664e-05	0.00289047	Sema6d
ENSMUSG00000027562	-3.48617	6.54896e-05	0.00291999	Car2
ENSMUSG00000000204	3.46114	6.72502e-05	0.00297628	Slfn4
ENSMUSG00000022582	4.248	6.95267e-05	0.00306945	Ly6g
ENSMUSG00000002602	-1.82685	6.9817e-05	0.00307469	Axl
ENSMUSG00000034796	6.57338	7.08393e-05	0.00310446	Cpne7
ENSMUSG00000033209	-1.5303	7.10557e-05	0.00310635	Ttc28
ENSMUSG00000028332	-4.7228	7.41357e-05	0.00321745	Hemgn
ENSMUSG00000025161	2.11416	7.83921e-05	0.00336954	Slc16a3
ENSMUSG00000097081	6.54842	8.10656e-05	0.00344318	Gm10425
ENSMUSG00000058385	1.54018	8.25992e-05	0.00350002	H2bc8
ENSMUSG00000054675	-5.0011	8.35148e-05	0.00351389	Tmem119
ENSMUSG00000050195	7.58895	8.31596e-05	0.00351389	Scd4
ENSMUSG00000004730	-1.7715	8.42296e-05	0.00353567	Adgre1
ENSMUSG00000025491	2.70776	8.67892e-05	0.00360808	Ifitm1
ENSMUSG00000071658	4.36639	8.69612e-05	0.00360808	Gng3
ENSMUSG00000001444	2.33802	8.72225e-05	0.00361057	Tbx21
ENSMUSG00000026131	-1.68092	8.861e-05	0.00365114	Dst
ENSMUSG00000052544	-4.8781	9.07992e-05	0.00370725	St6galnac3
ENSMUSG00000039813	3.2793	9.127e-05	0.00371801	Tbc1d2
ENSMUSG00000006179	5.99901	9.42846e-05	0.0038321	Prss16
ENSMUSG00000037443	-2.67968	9.54712e-05	0.00387155	Cep85
ENSMUSG00000040026	4.96196	9.57677e-05	0.00387481	Saa3
ENSMUSG00000042035	-1.60504	9.66199e-05	0.00390048	Igsf3
ENSMUSG00000101223	1.81439	9.73e-05	0.00391911	4930568A12Rik
ENSMUSG00000085977	3.64066	9.94094e-05	0.00396841	Gm5970
ENSMUSG00000118064	-6.62875	0.000100273	0.00399399	Gm50210
ENSMUSG00000110386	-2.97623	0.000100726	0.00399719	Gm42031
ENSMUSG00000041633	-2.25066	0.000101982	0.00401899	Kctd12b
ENSMUSG00000051497	-2.15556	0.000104247	0.00407976	Kcnj16
ENSMUSG00000074207	-2.4572	0.000104992	0.00409994	Adh1
ENSMUSG00000104876	1.5776	0.000106189	0.00412872	Trdc
ENSMUSG00000024663	-1.79126	0.000105999	0.00412872	Rab3il1
ENSMUSG00000050538	2.05181	0.000106975	0.00415024	B230217C12Rik
ENSMUSG00000032496	4.54651	0.000109423	0.00422692	Ltf
ENSMUSG00000042751	1.80009	0.000111305	0.00423538	Nmnat2
ENSMUSG00000023216	-4.71618	0.000110719	0.00423538	Epb42
ENSMUSG00000034573	1.67379	0.000112974	0.00423538	Ptpn13
ENSMUSG00000120586	3.67165	0.000111819	0.00423538	Gm56830
ENSMUSG00000022099	-5.43057	0.000113026	0.00423538	Dmtn
ENSMUSG00000041754	2.56094	0.000112407	0.00423538	Trem3
ENSMUSG00000118361	6.0857	0.000112182	0.00423538	Gm50237
ENSMUSG00000076555	2.54734	0.000114097	0.00426058	Igkv4-57-1
ENSMUSG00000033147	2.41148	0.00011922	0.00441509	Slc22a15
ENSMUSG00000108861	-5.34384	0.000119889	0.00443072	5930435M05Rik
ENSMUSG00000064225	-1.91834	0.000121261	0.00447219	Paqr9
ENSMUSG00000052512	-3.06207	0.000122184	0.00447856	Nav2
ENSMUSG00000007783	6.82607	0.000121999	0.00447856	Cpt1c
ENSMUSG00000021118	-7.05602	0.000121801	0.00447856	Plek2
ENSMUSG00000032554	-1.78533	0.000122576	0.00448378	Trf
ENSMUSG00000019838	-2.10207	0.000122864	0.00448517	Slc16a10
ENSMUSG00000078994	2.08871	0.000125488	0.00457165	Zfp429
ENSMUSG00000058287	3.53271	0.000127577	0.00462894	Gm12253
ENSMUSG00000115505	1.8786	0.000128227	0.00464312	Gm9247
ENSMUSG00000059042	6.07835	0.000130753	0.00471552	Klk1b9
ENSMUSG00000031722	2.68302	0.00013229	0.00474255	Hp
ENSMUSG00000112290	2.6923	0.000132735	0.00474877	Gm33782
ENSMUSG00000023078	2.53767	0.000134374	0.00478831	Cxcl13
ENSMUSG00000050989	1.61769	0.000139007	0.00490465	Selenon
ENSMUSG00000004655	-4.72118	0.000138697	0.00490465	Aqp1
ENSMUSG00000018593	-2.17437	0.000138992	0.00490465	Sparc
ENSMUSG00000022580	6.77915	0.000138521	0.00490465	Rhpn1
ENSMUSG00000044033	-5.7861	0.000145202	0.00510314	Ccdc141
ENSMUSG00000070490	1.53523	0.000145621	0.00510784	Gm10293
ENSMUSG00000049103	1.50869	0.000150941	0.00528411	Ccr2
ENSMUSG00000120697	1.62016	0.000152841	0.00530915	Gm36496
ENSMUSG00000042066	-4.3567	0.000155624	0.00539537	Tmcc2
ENSMUSG00000054135	-6.32109	0.000171079	0.00585194	A430110L20Rik
ENSMUSG00000027993	-2.88254	0.000173685	0.00592978	Trim2
ENSMUSG00000028644	-4.69496	0.000175737	0.00598842	Ermap
ENSMUSG00000061815	5.32994	0.000180566	0.00613074	Rufy4
ENSMUSG00000043940	-1.9688	0.000180597	0.00613074	Wdfy3
ENSMUSG00000040809	3.78121	0.00018126	0.0061384	Chil3
ENSMUSG00000028825	-4.68919	0.000181508	0.0061384	Rhd
ENSMUSG00000045639	-2.30734	0.000185853	0.00624997	Zfp629
ENSMUSG00000031974	-2.24221	0.000187207	0.00628371	Abcb10
ENSMUSG00000099569	1.82192	0.000190903	0.00639579	Gm18301
ENSMUSG00000108322	-3.11211	0.000197923	0.00658176	5430431A17Rik
ENSMUSG00000023132	2.78382	0.000197844	0.00658176	Gzma
ENSMUSG00000031613	-1.5379	0.00020116	0.00667702	Hpgd
ENSMUSG00000030144	2.58143	0.000202334	0.0066912	Clec4d
ENSMUSG00000018398	-2.43787	0.000202174	0.0066912	Septin8
ENSMUSG00000019464	-2.93533	0.0002098	0.00689992	Ptger1
ENSMUSG00000026073	2.65325	0.000221054	0.00723025	Il1r2
ENSMUSG00000093973	3.32704	0.000222189	0.00725413	Mrgpra2a
ENSMUSG00000063696	-3.07992	0.000223422	0.00728112	Gm8730
ENSMUSG00000026730	-2.99314	0.000224693	0.00730652	Pter
ENSMUSG00000022957	-1.96248	0.000225017	0.00730652	Itsn1
ENSMUSG00000040249	-1.86681	0.000228447	0.00739114	Lrp1
ENSMUSG00000045934	6.18055	0.000229151	0.00740055	Mtmr11
ENSMUSG00000076668	6.27495	0.000231103	0.00745016	Ighv7-4
ENSMUSG00000096188	-2.39031	0.000232657	0.00748276	Cmtm4
ENSMUSG00000031903	-1.50842	0.00024222	0.00775278	Pla2g15
ENSMUSG00000083104	-5.2802	0.000258078	0.00820177	Gm12917
ENSMUSG00000050666	-2.19887	0.000269564	0.00853651	Vstm4
ENSMUSG00000051111	5.22462	0.000278078	0.00874433	Sv2c
ENSMUSG00000029121	1.93816	0.000278768	0.00875067	Crmp1
ENSMUSG00000026532	-5.33435	0.000283665	0.00885787	Spta1
ENSMUSG00000033031	1.92155	0.000286121	0.00890353	Cip2a
ENSMUSG00000045954	-3.33617	0.000287224	0.00891964	Cavin2
ENSMUSG00000053199	-6.4535	0.000287634	0.00891964	Arhgap20
ENSMUSG00000040289	-6.81796	0.000290249	0.00893888	Hey1
ENSMUSG00000074479	1.55546	0.000297367	0.00911112	Rtraf-ps
ENSMUSG00000030054	-2.50864	0.000296765	0.00911112	Gp9
ENSMUSG00000027978	-1.95345	0.000298368	0.00912618	Prss12
ENSMUSG00000025702	-3.57779	0.000312798	0.00948532	Marchf8
ENSMUSG00000051586	-1.53859	0.000313432	0.00948532	Mical3
ENSMUSG00000106981	-6.33141	0.000318582	0.00958099	Gm45495
ENSMUSG00000059430	5.2786	0.00032931	0.00987049	Actg2
ENSMUSG00000039578	5.22699	0.000330777	0.00988868	Ccser1
ENSMUSG00000025743	-1.53812	0.000334822	0.00991069	Sdc3
ENSMUSG00000031825	3.11515	0.000336891	0.00994799	Crispld2
ENSMUSG00000121211	5.95543	0.000338021	0.00996494	Gm57458
ENSMUSG00000083534	6.87701	0.000338612	0.00996597	H2-M6-ps
ENSMUSG00000030310	-6.202	0.000342491	0.0100472	Slc6a1
ENSMUSG00000118078	2.65829	0.000346923	0.0101605	Gm50228
ENSMUSG00000020892	-7.45493	0.000353787	0.0103447	Aloxe3
ENSMUSG00000022197	-3.38495	0.000365055	0.0106049	Pdzd2
ENSMUSG00000081434	-2.65974	0.000368323	0.0106653	Gm14165
ENSMUSG00000030409	-2.12025	0.000370545	0.0106951	Dmpk
ENSMUSG00000030142	2.63787	0.000374292	0.0107513	Clec4e
ENSMUSG00000117964	2.10626	0.000374243	0.0107513	Gm36043
ENSMUSG00000020490	-7.05369	0.000382128	0.0109195	Btnl10
ENSMUSG00000031877	-5.99868	0.000387467	0.0110335	Ces2g
ENSMUSG00000108760	4.86194	0.000388694	0.0110411	Gm31897
ENSMUSG00000058728	2.09754	0.000395528	0.0111821	Cd300c
ENSMUSG00000023017	-6.10023	0.000395507	0.0111821	Asic1
ENSMUSG00000028367	1.52826	0.000401193	0.0112711	Txn1
ENSMUSG00000027962	-1.66614	0.000406015	0.0113783	Vcam1
ENSMUSG00000024371	-1.83799	0.000406276	0.0113783	C2
ENSMUSG00000120516	2.31783	0.00040899	0.0114364	Gm56972
ENSMUSG00000050014	1.51888	0.000410816	0.0114696	Apol10b
ENSMUSG00000108353	6.25578	0.000418602	0.0116507	Gm45205
ENSMUSG00000064246	2.6239	0.000424781	0.0117881	Chil1
ENSMUSG00000025993	-1.67664	0.000427918	0.0118547	Slc40a1
ENSMUSG00000094370	2.42036	0.000433785	0.0119451	Gm3373
ENSMUSG00000024597	-1.53226	0.000433848	0.0119451	Slc12a2
ENSMUSG00000032591	2.09468	0.000439785	0.0120628	Mst1
ENSMUSG00000073400	-5.06295	0.000440141	0.0120628	Trim10
ENSMUSG00000016255	-2.14752	0.000448088	0.0122619	Tubb1
ENSMUSG00000026981	2.08176	0.000456784	0.0124428	Il1rn
ENSMUSG00000032375	-2.15466	0.000461667	0.0125568	Aph1b
ENSMUSG00000108456	-4.09494	0.000468469	0.0126502	4732496C06Rik
ENSMUSG00000005540	-1.57376	0.000466962	0.0126502	Fcer2a
ENSMUSG00000100594	-1.73189	0.000479313	0.0129095	2810414N06Rik
ENSMUSG00000006574	-4.93634	0.000494619	0.013252	Slc4a1
ENSMUSG00000026090	2.51223	0.00050369	0.0134548	Cracdl
ENSMUSG00000071856	-2.6778	0.000523841	0.0139101	Mcc
ENSMUSG00000072476	-3.41452	0.000525266	0.0139273	Gm9008
ENSMUSG00000034059	-5.11826	0.000529999	0.0140231	Ypel4
ENSMUSG00000029001	3.62572	0.000531224	0.0140231	Fbxo44
ENSMUSG00000038725	-7.36412	0.000553811	0.0145124	Pkhd1l1
ENSMUSG00000076672	1.54066	0.000555068	0.0145242	Ighv3-6
ENSMUSG00000045629	-5.75415	0.0005564	0.0145378	Sh3tc2
ENSMUSG00000032609	-5.94966	0.000559132	0.0145879	Klhdc8b
ENSMUSG00000033213	5.07751	0.000569164	0.0147637	AA467197
ENSMUSG00000113136	4.29165	0.000577867	0.0149678	Gm19951
ENSMUSG00000051839	-4.64142	0.000589251	0.0151749	Gypa
ENSMUSG00000045573	2.18676	0.000593406	0.0152163	Penk
ENSMUSG00000044788	6.0074	0.000601195	0.0152849	Fads6
ENSMUSG00000027398	2.34765	0.000603901	0.0153319	Il1b
ENSMUSG00000049130	2.25886	0.000606477	0.0153538	C5ar1
ENSMUSG00000098207	-5.56025	0.000611589	0.0154179	Arl14
ENSMUSG00000067058	2.09964	0.000613021	0.0154182	Rps15a-ps5
ENSMUSG00000087700	1.61764	0.000613322	0.0154182	Gm15283
ENSMUSG00000102975	3.36754	0.000624098	0.0155799	Gm37347
ENSMUSG00000058260	5.4666	0.000623632	0.0155799	Serpina9
ENSMUSG00000054191	-4.26461	0.000627634	0.0156246	Klf1
ENSMUSG00000076550	2.16623	0.000638484	0.0158727	Igkv4-63
ENSMUSG00000108291	2.18141	0.000645716	0.0159859	Gm44292
ENSMUSG00000052212	3.48392	0.000654925	0.0161693	Cd177
ENSMUSG00000102425	6.3744	0.000676415	0.0165856	Gm26616
ENSMUSG00000076545	1.90655	0.000682603	0.0167145	Igkv4-72
ENSMUSG00000062995	2.61438	0.000685087	0.0167524	Ica1
ENSMUSG00000096010	2.26538	0.00069244	0.0169091	H4c16
ENSMUSG00000076754	2.17273	0.000712663	0.0172386	Trgv2
ENSMUSG00000021061	-4.12472	0.000714181	0.017252	Sptb
ENSMUSG00000044708	-1.79902	0.000730815	0.0175827	Kcnj10
ENSMUSG00000052302	-1.67931	0.000734739	0.0176534	Tbc1d30
ENSMUSG00000082399	-2.77238	0.000750557	0.0178911	Gm14036
ENSMUSG00000078817	3.32789	0.000769204	0.0181729	Nlrp12
ENSMUSG00000040146	-2.80679	0.000770555	0.0181729	Rgl3
ENSMUSG00000021806	-2.27146	0.000789417	0.0183284	Nid2
ENSMUSG00000090363	-4.75953	0.000795169	0.0184142	Gm3512
ENSMUSG00000025175	-4.73394	0.000812271	0.018786	Fn3k
ENSMUSG00000042476	-2.75587	0.000831409	0.0191545	Abcb4
ENSMUSG00000025318	-6.14084	0.000869212	0.0199485	Jph3
ENSMUSG00000106874	1.50588	0.000896305	0.0205314	Gm20186
ENSMUSG00000067613	3.4062	0.000896903	0.0205314	Krt83
ENSMUSG00000105879	1.90432	0.000899793	0.0205713	Gm6204
ENSMUSG00000020773	-2.74176	0.00092055	0.0209843	Trim47
ENSMUSG00000090439	4.28281	0.000925053	0.0210414	Gm17455
ENSMUSG00000013974	1.67241	0.000930806	0.021092	Mcemp1
ENSMUSG00000046352	3.60469	0.000946161	0.0213589	Gjb2
ENSMUSG00000094689	2.70507	0.00097565	0.0219142	Ighv1-81
ENSMUSG00000085826	-2.02714	0.00097763	0.0219238	Gm15638
ENSMUSG00000091050	1.82028	0.000990426	0.0221076	9330020H09Rik
ENSMUSG00000019996	1.58672	0.000993938	0.0221584	Map7
ENSMUSG00000037031	-2.04116	0.000999115	0.0222333	Tspan15
ENSMUSG00000055926	-5.91877	0.00102101	0.022595	Gm14137
ENSMUSG00000039899	1.71075	0.00102108	0.022595	Fgl2
ENSMUSG00000082101	-4.38354	0.00103358	0.0228333	Slfn14
ENSMUSG00000027463	1.78818	0.00104403	0.022988	Slc52a3
ENSMUSG00000120667	5.08008	0.00104526	0.022988	Gm56836
ENSMUSG00000042262	2.76821	0.00105273	0.0231239	Ccr8
ENSMUSG00000103967	-3.74544	0.00105994	0.0232537	Gm38214
ENSMUSG00000028328	-3.84618	0.00110417	0.0241111	Tmod1
ENSMUSG00000083282	-1.88195	0.00110419	0.0241111	Ctsf
ENSMUSG00000037432	-1.71701	0.00112162	0.0243692	Fer1l5
ENSMUSG00000025270	-3.15039	0.00112541	0.0243692	Alas2
ENSMUSG00000059423	-1.66814	0.00112574	0.0243692	Zfp933
ENSMUSG00000018648	2.62063	0.00112288	0.0243692	Dusp14
ENSMUSG00000060509	1.58914	0.00116752	0.025122	Xcr1
ENSMUSG00000051910	-4.71816	0.00120796	0.0257811	Sox6
ENSMUSG00000041707	-1.54584	0.00120822	0.0257811	Tmem273
ENSMUSG00000030084	-1.94618	0.00121807	0.0258989	Plxna1
ENSMUSG00000041842	-4.06382	0.00122225	0.0259568	Fhdc1
ENSMUSG00000022103	-1.64228	0.00122913	0.0259798	Gfra2
ENSMUSG00000001911	-1.68509	0.00123786	0.0261061	Nfix
ENSMUSG00000120038	1.63465	0.00127149	0.0265544	Gm36462
ENSMUSG00000108601	5.28121	0.00128819	0.0268171	Gm44645
ENSMUSG00000120284	-8.74072	0.00129197	0.0268645	Gm56714
ENSMUSG00000061751	3.31937	0.00129609	0.0269191	Kalrn
ENSMUSG00000097487	1.92035	0.00130277	0.0269953	Ptges3l
ENSMUSG00000042213	1.86074	0.00131244	0.0271328	Zfand4
ENSMUSG00000022322	1.87638	0.00134136	0.0275518	Shcbp1
ENSMUSG00000079138	2.07475	0.00135235	0.0277024	Gm8818
ENSMUSG00000076755	2.1674	0.00136409	0.0279109	Trgv1
ENSMUSG00000120524	5.51316	0.00138072	0.0281869	Gm57209
ENSMUSG00000020641	-1.91882	0.00139047	0.0282915	Rsad2
ENSMUSG00000120303	-5.88002	0.00140009	0.028371	4930500G05Rik
ENSMUSG00000014599	2.18728	0.00139898	0.028371	Csf1
ENSMUSG00000087049	-1.97599	0.0014131	0.0284909	Bach2it1
ENSMUSG00000092178	5.88235	0.00142466	0.0285953	Gm45351
ENSMUSG00000029862	6.0744	0.00142912	0.0286527	Clcn1
ENSMUSG00000020866	-8.36899	0.00145531	0.0290803	Cacna1g
ENSMUSG00000025151	-1.73252	0.00148261	0.0295598	Maged1
ENSMUSG00000094491	2.48808	0.00148907	0.0296556	Igkv1-133
ENSMUSG00000056671	1.71943	0.00149955	0.0297982	Prelid2
ENSMUSG00000051000	3.89559	0.0015041	0.0298444	Fhip1a
ENSMUSG00000073063	-4.10036	0.00150521	0.0298444	Hbq1b
ENSMUSG00000037095	2.68853	0.00152372	0.030178	Lrg1
ENSMUSG00000074874	3.05071	0.00154397	0.0303778	Ctla2b
ENSMUSG00000091705	3.12572	0.00154725	0.0304088	H2-Q2
ENSMUSG00000055027	2.61751	0.00158188	0.0309875	Smyd1
ENSMUSG00000029752	-2.37202	0.00158939	0.0310669	Asns
ENSMUSG00000004668	3.80875	0.00160817	0.0313263	Abca13
ENSMUSG00000026573	2.43628	0.00162543	0.0314624	Xcl1
ENSMUSG00000094006	2.2481	0.00162504	0.0314624	Igkv4-59
ENSMUSG00000063628	3.2186	0.00162308	0.0314624	Gm7665
ENSMUSG00000120222	5.08287	0.00164043	0.0316503	Gm56512
ENSMUSG00000103998	-4.12864	0.00165502	0.0318709	Gm38025
ENSMUSG00000074604	1.59792	0.00166007	0.0318946	Mgst2
ENSMUSG00000090958	-2.39766	0.00166199	0.0318946	Lrrc32
ENSMUSG00000112311	-5.63868	0.00166948	0.032004	Gm8153
ENSMUSG00000026566	-2.18172	0.00167783	0.0321298	Mpzl1
ENSMUSG00000025787	-5.03038	0.0016871	0.0322384	Tgm4
ENSMUSG00000113349	2.63327	0.00168946	0.0322491	Gm48369
ENSMUSG00000007379	-2.01899	0.00170201	0.032454	Dennd2c
ENSMUSG00000071113	2.21143	0.00177434	0.033442	Mboat4
ENSMUSG00000042331	-2.23462	0.0017938	0.0337732	Specc1
ENSMUSG00000096649	4.26821	0.00179866	0.0338291	Ighv1-31
ENSMUSG00000030854	-6.42704	0.00180439	0.0339013	Ptpn5
ENSMUSG00000037161	5.0005	0.00182151	0.0340495	Mgarp
ENSMUSG00000027983	4.8826	0.00181639	0.0340495	Cyp2u1
ENSMUSG00000039410	2.51704	0.00181804	0.0340495	Prdm16
ENSMUSG00000045009	4.01776	0.00182584	0.0340899	Prrt3
ENSMUSG00000042784	5.47119	0.00183858	0.0342336	Muc1
ENSMUSG00000031495	2.10483	0.00183926	0.0342336	Cd209d
ENSMUSG00000115946	3.02952	0.001842	0.034249	Mirt2
ENSMUSG00000042208	-1.52809	0.00185853	0.0345205	Sanbr
ENSMUSG00000031139	-4.48317	0.00186078	0.0345265	Mcf2
ENSMUSG00000040498	1.58221	0.00186303	0.0345325	Igsf23
ENSMUSG00000022180	-1.62377	0.00186945	0.0346157	Slc7a8
ENSMUSG00000080076	2.6836	0.0018718	0.0346235	H2ac14-ps
ENSMUSG00000033967	5.26056	0.001942	0.0355915	Rnf225
ENSMUSG00000025876	3.14134	0.00196238	0.0358254	Unc5a
ENSMUSG00000071343	2.55518	0.00196489	0.0358277	Gm10327
ENSMUSG00000004864	2.75223	0.00197813	0.035996	Mapk13
ENSMUSG00000099624	-1.85942	0.00198823	0.036143	Gm7889
ENSMUSG00000047181	-2.5598	0.00200936	0.0364902	Samd14
ENSMUSG00000090222	-2.62258	0.00204449	0.037053	Ifi203-ps
ENSMUSG00000028573	-1.51919	0.00211734	0.0381037	Fggy
ENSMUSG00000085673	5.13692	0.00215163	0.0385658	Gm16122
ENSMUSG00000105263	-1.56243	0.00219249	0.0389278	Gm42427
ENSMUSG00000053914	2.68222	0.00219355	0.0389278	Kdm4d
ENSMUSG00000110556	3.62372	0.00222816	0.0394225	Gm45762
ENSMUSG00000095130	3.30646	0.00223022	0.0394225	Ighv1-39
ENSMUSG00000035783	1.98198	0.00224358	0.0395928	Acta2
ENSMUSG00000097075	2.53701	0.00226031	0.0397975	Cdiptos
ENSMUSG00000031373	1.97245	0.00227216	0.0399668	Car5b
ENSMUSG00000020419	5.60009	0.00229305	0.0401915	Hormad2
ENSMUSG00000096908	1.82133	0.00232575	0.0405512	Trav7-3
ENSMUSG00000109314	-4.92159	0.002358	0.040855	Gm44699
ENSMUSG00000039166	-1.78824	0.00235875	0.040855	Akap7
ENSMUSG00000034612	1.95559	0.0023621	0.040855	Chst11
ENSMUSG00000017314	-3.47841	0.00237048	0.0408936	Mpp2
ENSMUSG00000035459	-1.51918	0.00237605	0.0409503	Stab2
ENSMUSG00000109680	-5.03925	0.00241178	0.0412883	Gm32098
ENSMUSG00000044162	2.12796	0.00242168	0.04135	Tnip3
ENSMUSG00000120726	4.93172	0.00242298	0.04135	Gm56619
ENSMUSG00000021594	3.74279	0.00243932	0.0414824	Srd5a1
ENSMUSG00000084775	-4.89545	0.0024458	0.0415138	Gm16741
ENSMUSG00000079222	2.34691	0.00244822	0.0415154	NA
ENSMUSG00000111758	4.38422	0.00246652	0.0417074	Gm30373
ENSMUSG00000024190	2.07755	0.00248219	0.0418935	Dusp1
ENSMUSG00000103734	5.34145	0.00251368	0.0422261	Gm37651
ENSMUSG00000103105	1.81983	0.00252796	0.0424262	Gm18752
ENSMUSG00000076540	2.80515	0.00253938	0.0425382	Igkv4-80
ENSMUSG00000117871	2.14896	0.00253738	0.0425382	Gm50287
ENSMUSG00000042417	5.50987	0.00256556	0.0428166	Ccno
ENSMUSG00000076430	-4.97813	0.00258189	0.043009	Hus1b
ENSMUSG00000117313	5.00012	0.00262463	0.0435591	Gm49838
ENSMUSG00000109086	2.05463	0.00264882	0.0438793	Gm5596
ENSMUSG00000069830	-3.86416	0.00271069	0.0446156	Nlrp1a
ENSMUSG00000028859	2.03774	0.00272135	0.044709	Csf3r
ENSMUSG00000032656	-1.78413	0.00275563	0.0450656	Marchf3
ENSMUSG00000051490	2.94624	0.00280463	0.0456172	Foxd4
ENSMUSG00000121478	2.76207	0.00285258	0.0461095	NA
ENSMUSG00000022468	2.50788	0.00285547	0.0461095	Endou
ENSMUSG00000111547	-2.37812	0.0028904	0.0464293	Gm48069
ENSMUSG00000085882	-3.25009	0.00288606	0.0464293	2610507I01Rik
ENSMUSG00000098043	3.99715	0.00289341	0.0464293	Gm26980
ENSMUSG00000117315	6.08899	0.00289157	0.0464293	1600022D10Rik
ENSMUSG00000021846	6.15417	0.00290307	0.0465426	Peli2
ENSMUSG00000049539	1.98633	0.00292132	0.0467515	H1f1
ENSMUSG00000060512	-2.24786	0.00292913	0.0468347	0610040J01Rik
ENSMUSG00000086158	1.63915	0.00294026	0.0469289	Pierce2
ENSMUSG00000079396	2.45918	0.00295879	0.0470988	Gm3411
ENSMUSG00000084860	-2.79485	0.00295666	0.0470988	2610204G07Rik
ENSMUSG00000023915	-1.52708	0.00295795	0.0470988	Tnfrsf21
ENSMUSG00000104117	2.98753	0.00296979	0.0471698	Gm20743
ENSMUSG00000108436	4.46477	0.00297091	0.0471698	Gm44851
ENSMUSG00000034329	1.51455	0.00297377	0.0471698	Brip1
ENSMUSG00000096719	2.89954	0.00299931	0.0474071	Mrgpra2b
ENSMUSG00000096003	2.53089	0.00300788	0.0474589	Gm3500
ENSMUSG00000111301	-1.72925	0.0030342	0.047832	Gm30671
ENSMUSG00000085808	4.44927	0.0030427	0.0478818	Gm14718
ENSMUSG00000076848	1.95853	0.00304148	0.0478818	Trav15-2-dv6-2
ENSMUSG00000049115	-7.98031	0.003061	0.0480854	Agtr1a
ENSMUSG00000011171	5.34134	0.00307684	0.0482764	Vipr2
ENSMUSG00000040165	3.73411	0.00310031	0.0484481	Cd209c
ENSMUSG00000041378	-2.87929	0.00313158	0.0487243	Cldn5
ENSMUSG00000034127	-4.85654	0.00318806	0.0493461	Tspan8
ENSMUSG00000112639	3.16796	0.00323778	0.0499432	A730063M14Rik
ENSMUSG00000053279	-3.25306	0.0032357	0.0499432	Aldh1a1

## Sheet: KO-8wk vs KO-UI - Fig. 2d
GeneID	log2FoldChange	pvalue	padj	Symbol
ENSMUSG00000054072	2.57811	4.11593e-24	7.60377e-20	Iigp1
ENSMUSG00000041202	-2.49089	4.09854e-21	2.52388e-17	Pla2g2d
ENSMUSG00000105096	2.60486	3.07983e-21	2.52388e-17	Gbp10
ENSMUSG00000071552	3.58119	2.02799e-19	9.36629e-16	Tigit
ENSMUSG00000009588	17.5442	1.33396e-17	4.92871e-14	St6galnac1
ENSMUSG00000055170	4.58977	6.45097e-17	1.98625e-13	Ifng
ENSMUSG00000028214	2.66443	1.77953e-16	4.69644e-13	Gem
ENSMUSG00000015437	4.37389	3.0799e-16	7.11226e-13	Gzmb
ENSMUSG00000075602	3.087	4.05007e-15	8.31344e-12	Ly6a
ENSMUSG00000030114	3.9619	1.92304e-14	3.55262e-11	Klrg1
ENSMUSG00000076672	3.3457	4.99773e-14	8.39346e-11	Ighv3-6
ENSMUSG00000064373	-1.71899	2.51238e-13	3.22658e-10	Selenop
ENSMUSG00000078853	1.50648	5.54432e-13	6.40162e-10	Igtp
ENSMUSG00000104713	1.66501	6.16452e-13	6.64873e-10	Gbp6
ENSMUSG00000023349	-2.78674	6.47814e-13	6.64873e-10	Clec4n
ENSMUSG00000020432	-2.00259	7.01334e-13	6.81918e-10	Tcn2
ENSMUSG00000099241	1.98462	1.79715e-12	1.58097e-09	Gvin-ps2
ENSMUSG00000098934	1.91089	2.17697e-12	1.82806e-09	Gvin-ps4
ENSMUSG00000026938	-3.11365	2.8797e-12	2.31303e-09	Fcna
ENSMUSG00000096632	4.01647	4.24074e-12	3.26431e-09	Igkv9-124
ENSMUSG00000030747	-2.78614	8.88035e-12	6.56222e-09	Dgat2
ENSMUSG00000034641	-2.80114	9.84021e-12	6.99184e-09	Cd300ld
ENSMUSG00000000817	2.89979	1.4553e-11	9.95752e-09	Fasl
ENSMUSG00000068606	5.09655	1.56633e-11	1.03344e-08	Gm4841
ENSMUSG00000096336	2.91025	1.72395e-11	1.06379e-08	Igkv1-135
ENSMUSG00000005413	-2.67956	1.81439e-11	1.06379e-08	Hmox1
ENSMUSG00000060044	-3.17013	2.00029e-11	1.1198e-08	Tmem26
ENSMUSG00000070369	-3.11035	2.28341e-11	1.23556e-08	Itgad
ENSMUSG00000076674	4.38079	2.34083e-11	1.23556e-08	Ighv3-8
ENSMUSG00000076508	3.46289	4.61582e-11	2.30467e-08	Igkv17-127
ENSMUSG00000032122	-2.45765	5.16267e-11	2.50987e-08	Slc37a2
ENSMUSG00000035004	-2.23283	5.75795e-11	2.7275e-08	Igsf6
ENSMUSG00000094420	3.28024	6.04906e-11	2.79376e-08	Igkv10-96
ENSMUSG00000086564	-1.61715	8.20468e-11	3.60889e-08	Cd101
ENSMUSG00000046245	-2.62253	9.63079e-11	4.13766e-08	Pilra
ENSMUSG00000034652	-2.2799	1.11898e-10	4.69818e-08	Cd300a
ENSMUSG00000025993	-3.05507	1.39054e-10	5.50002e-08	Slc40a1
ENSMUSG00000094797	3.40115	1.40216e-10	5.50002e-08	Igkv6-15
ENSMUSG00000076609	2.80583	1.42904e-10	5.50002e-08	Igkc
ENSMUSG00000095285	4.42091	1.41167e-10	5.50002e-08	Ighv5-9
ENSMUSG00000026473	-1.70027	1.47139e-10	5.54742e-08	Glul
ENSMUSG00000067149	2.5902	1.60449e-10	5.92827e-08	Jchain
ENSMUSG00000035448	-3.10733	1.67507e-10	6.06769e-08	Ccr3
ENSMUSG00000021939	-2.02554	1.78138e-10	6.32868e-08	Ctsb
ENSMUSG00000094094	4.49241	1.95679e-10	6.8207e-08	Igkv5-45
ENSMUSG00000095442	4.69085	2.05481e-10	7.02974e-08	Ighv1-4
ENSMUSG00000094433	4.08507	2.32565e-10	7.81163e-08	Igkv5-43
ENSMUSG00000032554	-2.94374	2.43203e-10	8.02308e-08	Trf
ENSMUSG00000020010	-3.04528	2.89902e-10	9.07737e-08	Vnn3
ENSMUSG00000045636	-3.25396	3.21647e-10	9.74116e-08	Mtus1
ENSMUSG00000028965	1.9817	4.45121e-10	1.27528e-07	Tnfrsf9
ENSMUSG00000066682	-2.5885	4.6941e-10	1.27528e-07	Pilrb2
ENSMUSG00000096515	3.94077	4.57641e-10	1.27528e-07	Igkv14-100
ENSMUSG00000022218	-2.33724	4.66925e-10	1.27528e-07	Tgm1
ENSMUSG00000095571	2.90601	4.61051e-10	1.27528e-07	Ighv5-17
ENSMUSG00000076598	4.19359	5.04581e-10	1.35096e-07	Igkv3-7
ENSMUSG00000002602	-2.84713	5.80491e-10	1.532e-07	Axl
ENSMUSG00000005803	-1.80567	6.08484e-10	1.5681e-07	Sqor
ENSMUSG00000076934	3.02739	6.11148e-10	1.5681e-07	Iglv1
ENSMUSG00000078586	14.9959	6.20946e-10	1.57142e-07	Gm11735
ENSMUSG00000025855	-2.69841	7.182e-10	1.76907e-07	Prkar1b
ENSMUSG00000023132	4.60012	7.50704e-10	1.8248e-07	Gzma
ENSMUSG00000002103	-2.14184	9.53724e-10	2.28819e-07	Acp2
ENSMUSG00000079362	1.88985	1.01008e-09	2.34697e-07	Gm43302
ENSMUSG00000095519	3.98979	1.01634e-09	2.34697e-07	Ighv1-66
ENSMUSG00000076514	3.58271	1.08392e-09	2.47214e-07	Igkv17-121
ENSMUSG00000096422	3.01971	1.2077e-09	2.72085e-07	Igkv12-44
ENSMUSG00000034714	-2.4062	1.24543e-09	2.77207e-07	Ttyh2
ENSMUSG00000047250	-2.6745	1.29608e-09	2.85046e-07	Ptgs1
ENSMUSG00000025150	-5.58473	1.44675e-09	3.14438e-07	Cbr2
ENSMUSG00000105906	2.84545	1.50762e-09	3.23858e-07	Iglc1
ENSMUSG00000076523	3.90563	1.52725e-09	3.24305e-07	Igkv15-103
ENSMUSG00000076532	3.09568	1.6676e-09	3.50082e-07	Igkv4-91
ENSMUSG00000036641	-3.00573	1.69435e-09	3.51701e-07	Ccdc148
ENSMUSG00000024621	-2.59373	1.76794e-09	3.629e-07	Csf1r
ENSMUSG00000040249	-3.05283	1.87661e-09	3.80972e-07	Lrp1
ENSMUSG00000022057	-2.23362	2.3604e-09	4.73979e-07	Adamdec1
ENSMUSG00000079138	4.14313	2.41995e-09	4.80711e-07	Gm8818
ENSMUSG00000041707	-2.88409	2.49611e-09	4.90565e-07	Tmem273
ENSMUSG00000108090	2.56661	2.60178e-09	5.0595e-07	Gm6637
ENSMUSG00000019055	-1.99002	2.80208e-09	5.39226e-07	Plod1
ENSMUSG00000031613	-2.46059	2.83792e-09	5.40491e-07	Hpgd
ENSMUSG00000035954	-2.6806	3.03857e-09	5.67015e-07	Dock4
ENSMUSG00000076752	2.90991	3.0919e-09	5.71197e-07	Trgc2
ENSMUSG00000037031	-4.0048	3.80995e-09	6.96881e-07	Tspan15
ENSMUSG00000028885	2.39343	3.93165e-09	7.07436e-07	Smpdl3b
ENSMUSG00000027962	-2.77228	4.04147e-09	7.17905e-07	Vcam1
ENSMUSG00000052684	2.60016	4.2213e-09	7.42708e-07	Jun
ENSMUSG00000025511	-2.24077	4.31661e-09	7.52311e-07	Tspan4
ENSMUSG00000001128	-2.23935	4.46008e-09	7.70051e-07	Cfp
ENSMUSG00000040713	-1.86459	4.68655e-09	8.0166e-07	Creg1
ENSMUSG00000008845	-3.22397	4.89779e-09	8.30109e-07	Cd163
ENSMUSG00000029361	-8.97413	5.06805e-09	8.51155e-07	Nos1
ENSMUSG00000076680	2.47961	6.77033e-09	1.11674e-06	Ighv6-6
ENSMUSG00000031451	-4.25689	6.88769e-09	1.12605e-06	Gas6
ENSMUSG00000020865	-3.52741	7.05425e-09	1.14316e-06	Abcc3
ENSMUSG00000001552	-2.34828	7.27293e-09	1.16835e-06	Jup
ENSMUSG00000037902	-2.24207	8.12624e-09	1.26741e-06	Sirpa
ENSMUSG00000076552	4.61798	8.16403e-09	1.26741e-06	Igkv4-61
ENSMUSG00000025950	-1.90378	9.38853e-09	1.42167e-06	Idh1
ENSMUSG00000006356	-2.32139	9.35805e-09	1.42167e-06	Crip2
ENSMUSG00000060147	-1.70415	9.48943e-09	1.42527e-06	Serpinb6a
ENSMUSG00000094335	2.68265	9.63816e-09	1.43593e-06	Igkv1-117
ENSMUSG00000043832	-2.14477	1.03563e-08	1.53058e-06	Clec4a3
ENSMUSG00000095771	3.18093	1.10766e-08	1.61125e-06	Igkv14-111
ENSMUSG00000079227	2.04476	1.106e-08	1.61125e-06	Ccr5
ENSMUSG00000074063	-2.18857	1.14377e-08	1.65079e-06	Osgin1
ENSMUSG00000076617	1.72665	1.24757e-08	1.78663e-06	Ighm
ENSMUSG00000090942	4.56264	1.36949e-08	1.93129e-06	F830016B08Rik
ENSMUSG00000001946	-2.50244	1.42537e-08	1.9639e-06	Esam
ENSMUSG00000020604	-3.05068	1.42313e-08	1.9639e-06	Arsg
ENSMUSG00000095079	3.30518	1.42697e-08	1.9639e-06	Igha
ENSMUSG00000015354	-3.14757	1.63225e-08	2.20103e-06	Pcolce2
ENSMUSG00000027200	-2.77538	1.70168e-08	2.27804e-06	Sema6d
ENSMUSG00000030474	-2.61734	1.75502e-08	2.30327e-06	Siglece
ENSMUSG00000021069	-2.63047	1.75794e-08	2.30327e-06	Pygl
ENSMUSG00000076538	3.54869	1.78852e-08	2.32684e-06	Igkv13-84
ENSMUSG00000095981	2.59155	1.8086e-08	2.33651e-06	Ighv10-1
ENSMUSG00000055435	-1.94459	1.87304e-08	2.40295e-06	Maf
ENSMUSG00000042684	-3.08673	1.93093e-08	2.41652e-06	Npl
ENSMUSG00000055546	-1.90432	1.89764e-08	2.41652e-06	Timd4
ENSMUSG00000051497	-3.14548	1.9269e-08	2.41652e-06	Kcnj16
ENSMUSG00000048498	-2.6556	1.94902e-08	2.41652e-06	Cd300e
ENSMUSG00000039521	1.99126	1.98544e-08	2.44527e-06	Foxp3
ENSMUSG00000021190	-2.0176	2.34169e-08	2.82748e-06	Lgmn
ENSMUSG00000095028	-2.7314	2.4638e-08	2.93653e-06	Sirpb1b
ENSMUSG00000066684	-2.47003	2.54736e-08	3.01666e-06	Pilrb1
ENSMUSG00000096844	5.81367	2.87943e-08	3.38819e-06	Igkv6-14
ENSMUSG00000044708	-2.98215	3.29195e-08	3.77103e-06	Kcnj10
ENSMUSG00000026994	-3.93732	3.28225e-08	3.77103e-06	Galnt3
ENSMUSG00000000791	1.61045	3.26981e-08	3.77103e-06	Il12rb1
ENSMUSG00000018930	2.73435	3.39219e-08	3.82118e-06	Ccl4
ENSMUSG00000013089	-2.24904	3.47226e-08	3.88766e-06	Etv5
ENSMUSG00000030427	-2.73072	3.81005e-08	4.21478e-06	Lilra6
ENSMUSG00000096672	4.22567	3.8597e-08	4.24429e-06	Ighv1-63
ENSMUSG00000021453	1.91078	4.03754e-08	4.41358e-06	Gadd45g
ENSMUSG00000033192	-2.01956	4.12073e-08	4.47802e-06	Lpcat2
ENSMUSG00000031903	-2.25449	4.29159e-08	4.61325e-06	Pla2g15
ENSMUSG00000096150	4.61864	4.29511e-08	4.61325e-06	Ighv1-85
ENSMUSG00000014361	-2.70544	4.62731e-08	4.94133e-06	Mertk
ENSMUSG00000074417	-2.11814	4.70802e-08	4.99862e-06	Pira12
ENSMUSG00000028019	-3.71393	4.84291e-08	5.11245e-06	Pdgfc
ENSMUSG00000050666	-3.36363	5.31778e-08	5.55032e-06	Vstm4
ENSMUSG00000042385	3.54576	5.28976e-08	5.55032e-06	Gzmk
ENSMUSG00000025161	-2.89751	6.13798e-08	6.3704e-06	Slc16a3
ENSMUSG00000076522	3.06641	6.30421e-08	6.50637e-06	Igkv16-104
ENSMUSG00000030737	-3.0047	6.37229e-08	6.54009e-06	Slco2b1
ENSMUSG00000076757	2.61435	6.82016e-08	6.89264e-06	Trgc4
ENSMUSG00000022272	-2.82979	6.94235e-08	6.97027e-06	Myo10
ENSMUSG00000098814	3.35376	7.08907e-08	7.0791e-06	Igkv19-93
ENSMUSG00000026482	-2.28058	7.20059e-08	7.1116e-06	Rgl1
ENSMUSG00000095204	3.58203	7.21112e-08	7.1116e-06	Ighv1-52
ENSMUSG00000032915	-2.72942	7.2371e-08	7.1116e-06	Adgre4
ENSMUSG00000028497	-2.38695	7.54461e-08	7.33574e-06	Hacd4
ENSMUSG00000061482	1.99058	7.65855e-08	7.40754e-06	H4c4
ENSMUSG00000029919	-2.25376	7.90736e-08	7.56894e-06	Hpgds
ENSMUSG00000071176	1.82269	9.13435e-08	8.65375e-06	Arhgef10
ENSMUSG00000078780	-2.98754	9.274e-08	8.74122e-06	Gm5150
ENSMUSG00000022181	-2.46214	9.40967e-08	8.82407e-06	C6
ENSMUSG00000000440	-2.12513	9.65226e-08	9.00585e-06	Pparg
ENSMUSG00000036353	-2.45956	9.84871e-08	9.03563e-06	P2ry12
ENSMUSG00000081534	-1.54754	9.79277e-08	9.03563e-06	Slc48a1
ENSMUSG00000023019	-3.33523	9.87982e-08	9.03563e-06	Gpd1
ENSMUSG00000036887	-2.33124	9.94885e-08	9.05394e-06	C1qa
ENSMUSG00000027718	7.41072	1.03382e-07	9.3165e-06	Il21
ENSMUSG00000028917	-1.5821	1.1224e-07	1.00656e-05	Plekhm2
ENSMUSG00000095589	2.65433	1.15845e-07	1.03387e-05	Ighv1-55
ENSMUSG00000026435	-2.7419	1.26206e-07	1.12093e-05	Slc45a3
ENSMUSG00000081665	-2.41356	1.32879e-07	1.17455e-05	Pira1
ENSMUSG00000095210	3.54276	1.36325e-07	1.19927e-05	Ighv5-9-1
ENSMUSG00000000149	-1.91694	1.45729e-07	1.2699e-05	Gna12
ENSMUSG00000004359	-2.05698	1.54142e-07	1.33066e-05	Spic
ENSMUSG00000022817	-2.65677	1.57812e-07	1.35601e-05	Itgb5
ENSMUSG00000002985	-2.13443	1.58564e-07	1.35617e-05	Apoe
ENSMUSG00000120890	2.78157	1.69248e-07	1.42771e-05	Gm56665
ENSMUSG00000093861	2.85493	1.72547e-07	1.44892e-05	Igkv1-110
ENSMUSG00000005360	-2.83352	1.76323e-07	1.47393e-05	Slc1a3
ENSMUSG00000076576	3.76126	1.79326e-07	1.47896e-05	Igkv6-32
ENSMUSG00000046794	-2.01661	1.78115e-07	1.47896e-05	Ppp1r3b
ENSMUSG00000066363	2.53888	1.78606e-07	1.47896e-05	Serpina3f
ENSMUSG00000046321	-3.53505	1.83501e-07	1.5e-05	Hs3st2
ENSMUSG00000022103	-2.66703	1.83193e-07	1.5e-05	Gfra2
ENSMUSG00000014778	-1.52098	1.91975e-07	1.56235e-05	Fhod1
ENSMUSG00000020053	-2.25936	1.94957e-07	1.57966e-05	Igf1
ENSMUSG00000045087	4.5309	1.95855e-07	1.58001e-05	S1pr5
ENSMUSG00000032890	-2.58577	1.96769e-07	1.58048e-05	Rims3
ENSMUSG00000040204	2.02812	2.00677e-07	1.6049e-05	Pclaf
ENSMUSG00000023031	-2.38999	2.21864e-07	1.75911e-05	Cela1
ENSMUSG00000099696	-2.77231	2.25055e-07	1.77678e-05	2900052N01Rik
ENSMUSG00000058135	-2.4337	2.33706e-07	1.83723e-05	Gstm1
ENSMUSG00000105606	3.03629	2.3755e-07	1.85953e-05	Igkv2-109
ENSMUSG00000118361	6.18831	2.46298e-07	1.91181e-05	Gm50237
ENSMUSG00000079553	1.81607	2.47749e-07	1.91503e-05	Kifc1
ENSMUSG00000037129	4.14515	2.51682e-07	1.93732e-05	Tmprss13
ENSMUSG00000004730	-2.32291	2.56113e-07	1.96325e-05	Adgre1
ENSMUSG00000095429	3.89216	2.58282e-07	1.9717e-05	Ighv5-12
ENSMUSG00000030167	2.0618	3.0173e-07	2.28449e-05	Klrc1
ENSMUSG00000051439	-2.27355	3.03927e-07	2.29173e-05	Cd14
ENSMUSG00000050957	1.54602	3.05627e-07	2.29518e-05	Insl6
ENSMUSG00000076536	3.97262	3.08595e-07	2.30809e-05	Igkv4-86
ENSMUSG00000036606	-2.101	3.31803e-07	2.47167e-05	Plxnb2
ENSMUSG00000030154	2.89031	3.35311e-07	2.48776e-05	Klrb1f
ENSMUSG00000034947	-1.70097	3.52659e-07	2.59563e-05	Tmem106a
ENSMUSG00000058099	-1.88405	3.79907e-07	2.78508e-05	Nfam1
ENSMUSG00000076577	3.62395	4.08368e-07	2.97015e-05	Igkv8-30
ENSMUSG00000022180	-2.65167	4.11442e-07	2.98077e-05	Slc7a8
ENSMUSG00000076612	5.08645	4.20008e-07	3.03095e-05	Ighg2c
ENSMUSG00000031824	-2.88692	4.31424e-07	3.10122e-05	6430548M08Rik
ENSMUSG00000092021	1.99937	4.34274e-07	3.1096e-05	Gbp11
ENSMUSG00000094930	3.80932	4.68142e-07	3.31358e-05	Igkv6-25
ENSMUSG00000089942	-2.36228	4.79439e-07	3.3806e-05	Pira2
ENSMUSG00000024044	-2.51539	4.91316e-07	3.42825e-05	Epb41l3
ENSMUSG00000111913	7.15581	5.04121e-07	3.49135e-05	Gm49751
ENSMUSG00000039115	-3.28755	5.04597e-07	3.49135e-05	Itga9
ENSMUSG00000074677	-2.41773	5.21663e-07	3.59597e-05	Sirpb1c
ENSMUSG00000066026	-1.96851	5.45817e-07	3.74848e-05	Dhrs3
ENSMUSG00000095630	3.16227	5.51746e-07	3.77517e-05	Igkv6-23
ENSMUSG00000018774	-1.78234	5.57852e-07	3.80286e-05	Cd68
ENSMUSG00000032261	-2.23535	5.74134e-07	3.89947e-05	Sh3bgrl2
ENSMUSG00000021360	-3.00035	6.0703e-07	4.10779e-05	Gcnt2
ENSMUSG00000028874	-1.73402	6.22333e-07	4.19598e-05	Fgr
ENSMUSG00000095788	-1.91869	6.37534e-07	4.26732e-05	Sirpb1a
ENSMUSG00000037419	1.50438	6.86339e-07	4.56094e-05	Endod1
ENSMUSG00000043300	-2.60571	7.33789e-07	4.85879e-05	B3galnt1
ENSMUSG00000036905	-2.1356	7.46686e-07	4.90899e-05	C1qb
ENSMUSG00000000686	-1.57853	7.51417e-07	4.91315e-05	Abhd15
ENSMUSG00000048852	1.54852	7.52637e-07	4.91315e-05	Gm12185
ENSMUSG00000030148	-2.08293	7.77729e-07	5.04408e-05	Clec4a2
ENSMUSG00000033508	-2.1682	7.78155e-07	5.04408e-05	Asprv1
ENSMUSG00000025747	1.59481	7.83003e-07	5.05776e-05	Tyms
ENSMUSG00000022892	-1.79977	8.14468e-07	5.22677e-05	App
ENSMUSG00000110570	2.1954	9.52143e-07	6.06548e-05	Gm45778
ENSMUSG00000033295	7.1026	9.68515e-07	6.14857e-05	Ptprf
ENSMUSG00000027656	-8.47638	9.80111e-07	6.17972e-05	Ccn5
ENSMUSG00000059498	-2.10379	1.02432e-06	6.43652e-05	Fcgr3
ENSMUSG00000076533	6.95152	1.03382e-06	6.47418e-05	Igkv4-90
ENSMUSG00000025330	-2.72331	1.05237e-06	6.54593e-05	Padi4
ENSMUSG00000076652	2.78637	1.06272e-06	6.58814e-05	Ighv7-3
ENSMUSG00000067235	-1.61953	1.10641e-06	6.83604e-05	H2-Q10
ENSMUSG00000063903	3.12761	1.12631e-06	6.93579e-05	Klk1
ENSMUSG00000087450	-3.20329	1.14322e-06	7.01659e-05	Gm13994
ENSMUSG00000120372	2.73037	1.24771e-06	7.60733e-05	Gm57122
ENSMUSG00000032578	1.63218	1.29412e-06	7.86431e-05	Cish
ENSMUSG00000095197	3.1757	1.34027e-06	8.09156e-05	Ighv1-59
ENSMUSG00000015568	-2.39601	1.34615e-06	8.10061e-05	Lpl
ENSMUSG00000052336	2.31152	1.35196e-06	8.10913e-05	Cx3cr1
ENSMUSG00000095633	4.19464	1.36827e-06	8.15402e-05	Igkv4-58
ENSMUSG00000037706	-1.57561	1.40217e-06	8.32914e-05	Cd81
ENSMUSG00000038034	-1.93022	1.55879e-06	9.22985e-05	Igsf8
ENSMUSG00000094356	3.24876	1.69702e-06	0.000100162	Igkv8-28
ENSMUSG00000037820	-1.99299	1.71215e-06	0.000100734	Tgm2
ENSMUSG00000032238	1.57865	1.74651e-06	0.000102105	Rora
ENSMUSG00000024451	-2.41773	1.9127e-06	0.000110769	Arap3
ENSMUSG00000026177	-2.10635	1.92285e-06	0.000110777	Slc11a1
ENSMUSG00000097944	-1.82214	1.92484e-06	0.000110777	A130014A01Rik
ENSMUSG00000051682	-1.86849	1.95107e-06	0.000111938	Treml4
ENSMUSG00000069516	-1.72259	1.9603e-06	0.000112119	Lyz2
ENSMUSG00000036067	-1.72666	1.96803e-06	0.000112214	Slc2a6
ENSMUSG00000030208	4.14978	2.07285e-06	0.000117827	Emp1
ENSMUSG00000029417	1.65242	2.12398e-06	0.000119629	Cxcl9
ENSMUSG00000036896	-3.15557	2.19155e-06	0.00012306	C1qc
ENSMUSG00000076541	2.9637	2.20495e-06	0.000123064	Igkv4-79
ENSMUSG00000043740	-1.86062	2.20238e-06	0.000123064	B430306N03Rik
ENSMUSG00000033720	-2.45842	2.27802e-06	0.000126759	Sfxn5
ENSMUSG00000023913	-2.30067	2.35306e-06	0.000130542	Pla2g7
ENSMUSG00000002108	-1.71661	2.56476e-06	0.000141437	Nr1h3
ENSMUSG00000017737	-3.22079	2.61961e-06	0.000142337	Mmp9
ENSMUSG00000029484	-1.55131	2.6109e-06	0.000142337	Anxa3
ENSMUSG00000022371	-3.68245	2.64149e-06	0.000142687	Col14a1
ENSMUSG00000021125	-3.22204	2.73319e-06	0.000146245	Arg2
ENSMUSG00000118051	7.30821	2.7304e-06	0.000146245	Gm8714
ENSMUSG00000025154	-2.02348	2.73903e-06	0.000146245	Arhgap19
ENSMUSG00000094134	5.12645	2.75406e-06	0.000146624	Ighv5-15
ENSMUSG00000058715	-1.83607	2.80937e-06	0.000148711	Fcer1g
ENSMUSG00000045502	-2.42711	3.11141e-06	0.000162876	Hcar2
ENSMUSG00000095753	2.8239	3.11222e-06	0.000162876	Igkv4-53
ENSMUSG00000076547	3.34268	3.09608e-06	0.000162876	Igkv4-70
ENSMUSG00000026712	-2.78176	3.18902e-06	0.000166423	Mrc1
ENSMUSG00000024011	-3.43992	3.30301e-06	0.000171887	Pi16
ENSMUSG00000049130	-3.05797	3.33427e-06	0.000172541	C5ar1
ENSMUSG00000038388	-1.75225	3.36136e-06	0.000173457	Pals2
ENSMUSG00000031584	-1.96926	3.50369e-06	0.000179798	Gsr
ENSMUSG00000055322	-1.54913	3.59003e-06	0.000183211	Tns1
ENSMUSG00000041481	1.59582	3.62048e-06	0.000184256	Serpina3g
ENSMUSG00000015854	-1.75117	3.63543e-06	0.000184508	Cd5l
ENSMUSG00000037966	-1.60492	3.69843e-06	0.000187191	Ninj1
ENSMUSG00000028517	-2.30183	3.75872e-06	0.000189206	Plpp3
ENSMUSG00000036362	-2.17406	3.80838e-06	0.000190667	P2ry13
ENSMUSG00000037762	-2.91957	3.89065e-06	0.000193736	Slc16a9
ENSMUSG00000045664	-1.73993	3.9613e-06	0.000196723	Cdc42ep2
ENSMUSG00000064039	-8.03849	3.97954e-06	0.000197099	Ccr1l1
ENSMUSG00000058818	-1.72817	3.99602e-06	0.000197196	Pirb
ENSMUSG00000047678	2.78003	4.02156e-06	0.000197591	Gpr82
ENSMUSG00000095127	3.01132	4.03776e-06	0.000197861	Ighv1-82
ENSMUSG00000040722	-2.4847	4.07748e-06	0.000198753	Scamp5
ENSMUSG00000029822	1.95158	4.3068e-06	0.000209379	Osbpl3
ENSMUSG00000004609	-2.4074	4.32266e-06	0.000209598	Cd33
ENSMUSG00000076754	2.92403	4.3497e-06	0.000209808	Trgv2
ENSMUSG00000038578	-1.73906	4.37131e-06	0.000210301	Susd1
ENSMUSG00000027939	1.99819	4.42629e-06	0.000212393	Nup210l
ENSMUSG00000031722	-3.21408	4.58414e-06	0.000218831	Hp
ENSMUSG00000030084	-2.7835	4.64491e-06	0.000220591	Plxna1
ENSMUSG00000022235	-2.78307	4.65751e-06	0.000220623	Cmbl
ENSMUSG00000060703	-1.90515	4.70783e-06	0.000222436	Cd302
ENSMUSG00000035459	-2.28782	4.97123e-06	0.000234282	Stab2
ENSMUSG00000001555	7.65961	5.00802e-06	0.000235415	Fkbp10
ENSMUSG00000025743	-1.95057	5.41484e-06	0.000251622	Sdc3
ENSMUSG00000040907	-2.02601	5.42089e-06	0.000251622	Atp1a3
ENSMUSG00000094872	2.79192	5.53191e-06	0.000256131	Igkv9-120
ENSMUSG00000039005	-2.07339	5.64554e-06	0.000260739	Tlr4
ENSMUSG00000032827	-6.70958	5.78449e-06	0.00026649	Ppp1r9a
ENSMUSG00000094087	4.11931	5.85683e-06	0.000269152	Ighv1-61
ENSMUSG00000095416	2.95664	5.88029e-06	0.000269559	Ighv1-12
ENSMUSG00000076564	2.44296	6.05936e-06	0.000277081	Igkv12-46
ENSMUSG00000060512	-3.51553	6.29249e-06	0.00028562	0610040J01Rik
ENSMUSG00000064225	-2.27913	6.42378e-06	0.000290865	Paqr9
ENSMUSG00000038235	-2.16366	6.4747e-06	0.00029174	F11r
ENSMUSG00000096464	2.09163	6.47112e-06	0.00029174	Ighv2-2
ENSMUSG00000076583	2.69747	6.53469e-06	0.000293727	Igkv8-24
ENSMUSG00000024730	-2.97779	6.88768e-06	0.00030735	Ms4a8a
ENSMUSG00000035042	2.11161	7.01215e-06	0.000312151	Ccl5
ENSMUSG00000021965	2.33865	7.07998e-06	0.000314412	Ska3
ENSMUSG00000094787	2.73897	7.19648e-06	0.00031882	Ighv1-54
ENSMUSG00000015947	-2.04539	7.35603e-06	0.000324333	Fcgr1
ENSMUSG00000056220	-2.20441	7.86448e-06	0.000344959	Pla2g4a
ENSMUSG00000002012	6.80634	7.87987e-06	0.000344959	Pnck
ENSMUSG00000076613	3.30156	8.436e-06	0.000368432	Ighg2b
ENSMUSG00000040616	-1.63578	8.77376e-06	0.000380485	Tmem51
ENSMUSG00000033788	-2.63825	8.75637e-06	0.000380485	Dysf
ENSMUSG00000081251	-1.6504	8.76682e-06	0.000380485	Gm12164
ENSMUSG00000033470	1.74378	8.96945e-06	0.000387153	Cysltr2
ENSMUSG00000095642	3.14513	8.99985e-06	0.00038756	Ighv14-3
ENSMUSG00000050022	-1.58458	9.13813e-06	0.0003926	Amz1
ENSMUSG00000120516	3.71856	9.26013e-06	0.000395999	Gm56972
ENSMUSG00000030144	-3.06246	9.64904e-06	0.000410729	Clec4d
ENSMUSG00000094088	3.20517	9.82787e-06	0.000417379	Ighv1-64
ENSMUSG00000023915	-2.26844	9.91973e-06	0.000420314	Tnfrsf21
ENSMUSG00000076556	2.54706	9.98273e-06	0.000422016	Igkv4-57
ENSMUSG00000096594	2.58533	1.0383e-05	0.000437935	Igkv8-19
ENSMUSG00000060733	-1.56992	1.04651e-05	0.000440393	Ipmk
ENSMUSG00000005233	1.9142	1.09281e-05	0.000458831	Spc25
ENSMUSG00000076633	4.92338	1.11288e-05	0.000466197	Ighv5-2
ENSMUSG00000048264	-2.52005	1.13326e-05	0.000473662	Dip2c
ENSMUSG00000018927	-2.1696	1.15892e-05	0.000482203	Ccl6
ENSMUSG00000097296	-2.46599	1.17429e-05	0.000486409	Gm26532
ENSMUSG00000063193	-2.7919	1.17386e-05	0.000486409	Cd300lb
ENSMUSG00000076604	3.23377	1.18865e-05	0.000491254	Igkj1
ENSMUSG00000054115	-1.69038	1.22209e-05	0.000503948	Skp2
ENSMUSG00000025911	-3.58744	1.26131e-05	0.000518961	Adhfe1
ENSMUSG00000074419	-2.4734	1.49642e-05	0.000606246	Pira13
ENSMUSG00000076937	1.75027	1.5161e-05	0.000612876	Iglc2
ENSMUSG00000095583	2.3014	1.53794e-05	0.000620347	Ighv14-2
ENSMUSG00000068747	-2.22454	1.58833e-05	0.000639275	Sort1
ENSMUSG00000026566	-2.99861	1.61339e-05	0.000646548	Mpzl1
ENSMUSG00000097585	-1.84829	1.61002e-05	0.000646548	E230029C05Rik
ENSMUSG00000049037	-1.80779	1.63318e-05	0.000653059	Clec4a1
ENSMUSG00000024663	-1.99172	1.64396e-05	0.000655951	Rab3il1
ENSMUSG00000076543	3.75199	1.66828e-05	0.000664219	Igkv4-74
ENSMUSG00000076731	2.79007	1.70823e-05	0.000676072	Ighv8-12
ENSMUSG00000046341	2.00306	1.72226e-05	0.000679852	Gm11223
ENSMUSG00000026955	2.52838	1.72632e-05	0.000680001	Sapcd2
ENSMUSG00000078122	-2.31367	1.73268e-05	0.000681053	F630028O10Rik
ENSMUSG00000032046	-1.68627	1.76525e-05	0.000692382	Abhd12
ENSMUSG00000024597	-1.89534	1.7773e-05	0.000695634	Slc12a2
ENSMUSG00000022261	-7.84094	1.80441e-05	0.000704751	Sdc2
ENSMUSG00000094102	3.96257	1.81065e-05	0.000705697	Ighv9-2
ENSMUSG00000003355	3.46472	1.84539e-05	0.000715634	Fkbp11
ENSMUSG00000028859	-2.90999	1.85982e-05	0.000717292	Csf3r
ENSMUSG00000026475	2.10222	1.87403e-05	0.000718276	Rgs16
ENSMUSG00000058542	-1.51138	1.87162e-05	0.000718276	Gm15590
ENSMUSG00000094075	2.76874	1.89348e-05	0.000722222	Ighv1-80
ENSMUSG00000076549	3.04944	1.99776e-05	0.000757962	Igkv4-68
ENSMUSG00000026442	-8.49366	2.00293e-05	0.000758239	Nfasc
ENSMUSG00000022838	2.66923	2.03214e-05	0.000764599	Eaf2
ENSMUSG00000003518	-1.54797	2.06386e-05	0.000773384	Dusp3
ENSMUSG00000052125	1.89381	2.16236e-05	0.000807019	F730043M19Rik
ENSMUSG00000024053	-2.65676	2.21649e-05	0.000825555	Emilin2
ENSMUSG00000076695	2.50693	2.26332e-05	0.0008413	Ighv1-18
ENSMUSG00000026770	2.01893	2.28583e-05	0.00084457	Il2ra
ENSMUSG00000074170	2.49281	2.2837e-05	0.00084457	Plekhf1
ENSMUSG00000032348	-3.29292	2.27813e-05	0.00084457	Gsta4
ENSMUSG00000039246	-4.69754	2.30616e-05	0.000850378	Lyplal1
ENSMUSG00000062373	-1.6328	2.35748e-05	0.000867573	Tmem65
ENSMUSG00000086152	6.52459	2.39376e-05	0.000878675	Gm11454
ENSMUSG00000043939	-2.90853	2.39716e-05	0.000878675	A530064D06Rik
ENSMUSG00000058260	6.6926	2.4324e-05	0.000889826	Serpina9
ENSMUSG00000032507	3.12168	2.47041e-05	0.000901943	Fbxl2
ENSMUSG00000028832	1.57074	2.50942e-05	0.000910788	Stmn1
ENSMUSG00000037982	2.19947	2.56696e-05	0.000929843	Gm9725
ENSMUSG00000018341	1.91819	2.71617e-05	0.00098005	Il12rb2
ENSMUSG00000043017	-2.60544	2.75064e-05	0.000990553	Ptgir
ENSMUSG00000013974	-2.111	2.78586e-05	0.00100129	Mcemp1
ENSMUSG00000038740	-1.79743	2.82604e-05	0.00101375	Mvb12b
ENSMUSG00000034853	-1.67607	2.83383e-05	0.00101458	Acot11
ENSMUSG00000076525	3.75029	2.91483e-05	0.00103955	Igkv1-99
ENSMUSG00000048078	-3.10702	2.94199e-05	0.00104721	Tenm4
ENSMUSG00000020592	1.89326	3.03965e-05	0.00107782	Sdc1
ENSMUSG00000041268	-3.54559	3.06623e-05	0.00108516	Dmxl2
ENSMUSG00000054589	-2.50916	3.08524e-05	0.0010898	Gm9949
ENSMUSG00000076940	2.1842	3.20088e-05	0.0011242	Iglv2
ENSMUSG00000017002	-2.0865	3.31028e-05	0.00116042	Slpi
ENSMUSG00000050989	-1.74546	3.32238e-05	0.00116245	Selenon
ENSMUSG00000106269	5.86712	3.35125e-05	0.00117034	4930580E04Rik
ENSMUSG00000026141	-7.79657	3.36101e-05	0.00117153	Col19a1
ENSMUSG00000036622	-1.66113	3.48871e-05	0.0012092	Atp13a2
ENSMUSG00000000958	-2.03077	3.5261e-05	0.00121987	Slc7a7
ENSMUSG00000032564	-5.79892	3.60559e-05	0.00124272	Cpne4
ENSMUSG00000022607	-1.74553	3.65418e-05	0.00125478	Ptk2
ENSMUSG00000051359	2.47268	3.65213e-05	0.00125478	Ncald
ENSMUSG00000104765	4.99123	3.68581e-05	0.0012633	Gm43058
ENSMUSG00000102418	-1.69829	3.80761e-05	0.00130022	Sh2d1b1
ENSMUSG00000031373	2.71008	3.88154e-05	0.00131816	Car5b
ENSMUSG00000075705	-1.72686	3.89997e-05	0.00131956	Msrb1
ENSMUSG00000026039	2.01153	4.11018e-05	0.00137308	Sgo2a
ENSMUSG00000074794	-1.54646	4.1056e-05	0.00137308	Arrdc3
ENSMUSG00000039691	-3.42788	4.18882e-05	0.0013918	Tspan10
ENSMUSG00000051586	-1.75883	4.20691e-05	0.0013953	Mical3
ENSMUSG00000039114	1.78104	4.29294e-05	0.00141874	Nrn1
ENSMUSG00000037725	1.6324	4.32641e-05	0.00142471	Ckap2
ENSMUSG00000018451	3.48711	4.34924e-05	0.00142968	6330403K07Rik
ENSMUSG00000035246	3.18824	4.43623e-05	0.00145568	Pcyt1b
ENSMUSG00000021806	-2.8034	4.46668e-05	0.00146098	Nid2
ENSMUSG00000037605	-2.97522	4.60217e-05	0.00150213	Adgrl3
ENSMUSG00000076535	3.2299	4.61258e-05	0.00150287	Igkv1-88
ENSMUSG00000022584	1.88919	4.69867e-05	0.00152823	Ly6c2
ENSMUSG00000079293	-1.9701	4.77169e-05	0.00154724	Clec7a
ENSMUSG00000031004	1.81759	4.77387e-05	0.00154724	Mki67
ENSMUSG00000025151	-2.21905	4.90114e-05	0.00157838	Maged1
ENSMUSG00000095682	3.41478	4.90415e-05	0.00157838	Igkv3-1
ENSMUSG00000029059	-1.65373	4.95703e-05	0.00158986	Prxl2b
ENSMUSG00000116114	-2.08654	5.23304e-05	0.00166395	Gm35853
ENSMUSG00000069270	2.11831	5.25556e-05	0.00166823	H2ac6
ENSMUSG00000006411	-2.78825	5.36241e-05	0.00169342	Nectin4
ENSMUSG00000025648	-2.03405	5.37795e-05	0.00169543	Pfkfb4
ENSMUSG00000114213	5.64867	5.41533e-05	0.00170431	A430090L17Rik
ENSMUSG00000033488	-1.6095	5.43789e-05	0.0017059	Cryzl2
ENSMUSG00000033777	-2.01269	5.43887e-05	0.0017059	Tlr13
ENSMUSG00000034177	1.5382	5.60723e-05	0.00175276	Rnf43
ENSMUSG00000007837	-1.71939	5.70457e-05	0.00178017	Prrg2
ENSMUSG00000076594	3.18799	5.74561e-05	0.00178694	Igkv6-13
ENSMUSG00000040537	-1.73994	5.89579e-05	0.00181532	Adam22
ENSMUSG00000121059	-3.45234	6.14956e-05	0.00188716	Gm57137
ENSMUSG00000047798	-1.85138	6.22027e-05	0.00190254	Cd300lf
ENSMUSG00000029075	1.66931	6.27634e-05	0.00191335	Tnfrsf4
ENSMUSG00000045551	-2.10928	6.29867e-05	0.001917	Fpr1
ENSMUSG00000049093	6.91136	6.33301e-05	0.00192428	Il23r
ENSMUSG00000012443	1.62624	6.39774e-05	0.00194075	Kif11
ENSMUSG00000055782	-2.3157	6.43936e-05	0.00195017	Abcd2
ENSMUSG00000107355	-3.16888	6.45428e-05	0.0019515	AI839979
ENSMUSG00000026478	2.64645	6.46852e-05	0.00195261	Lamc1
ENSMUSG00000015970	3.53532	6.61642e-05	0.00199074	Chdh
ENSMUSG00000060224	-2.84058	6.65192e-05	0.00199645	Pyroxd2
ENSMUSG00000032218	1.58254	6.92739e-05	0.00207417	Ccnb2
ENSMUSG00000069792	-2.14826	7.03571e-05	0.00210047	Wfdc17
ENSMUSG00000026180	-2.85811	7.11767e-05	0.00211742	Cxcr2
ENSMUSG00000051504	1.80496	7.17316e-05	0.0021305	Siglech
ENSMUSG00000054855	-1.9922	7.18635e-05	0.00213099	Rnd1
ENSMUSG00000096459	2.67955	7.33762e-05	0.00217236	Ighv9-3
ENSMUSG00000030579	-1.62012	7.5446e-05	0.00221941	Tyrobp
ENSMUSG00000065987	-5.01499	7.54215e-05	0.00221941	Cd209b
ENSMUSG00000032066	-2.73907	7.53584e-05	0.00221941	Bco2
ENSMUSG00000120752	6.56819	7.65401e-05	0.00224445	Gm57289
ENSMUSG00000027469	1.74018	7.83708e-05	0.00229086	Tpx2
ENSMUSG00000095385	-7.44637	7.9046e-05	0.00230695	D630033O11Rik
ENSMUSG00000039545	-3.79189	7.9873e-05	0.00232008	Flicr
ENSMUSG00000025321	4.71714	8.01207e-05	0.00232363	Itgb8
ENSMUSG00000094561	2.60689	8.07815e-05	0.00232817	Ighv1-22
ENSMUSG00000007021	7.52482	8.04108e-05	0.00232817	Syngr3
ENSMUSG00000038156	2.08752	8.14505e-05	0.00234379	Spon1
ENSMUSG00000020649	1.54164	8.17355e-05	0.00234834	Rrm2
ENSMUSG00000051378	2.41797	8.25279e-05	0.00236489	Kif18b
ENSMUSG00000071856	-3.31956	8.38967e-05	0.00239924	Mcc
ENSMUSG00000022324	-2.07165	8.48738e-05	0.00241969	Matn2
ENSMUSG00000017466	-1.74953	8.62771e-05	0.00245213	Timp2
ENSMUSG00000015846	-1.54744	8.71735e-05	0.0024738	Rxra
ENSMUSG00000019966	-2.74028	8.81096e-05	0.00249653	Kitl
ENSMUSG00000020473	7.10993	8.91708e-05	0.00252273	Aebp1
ENSMUSG00000046959	7.09211	8.96051e-05	0.00252727	Slc26a1
ENSMUSG00000092618	-2.35665	8.95848e-05	0.00252727	Btnl6
ENSMUSG00000091993	2.22193	9.0969e-05	0.0025592	B930036N10Rik
ENSMUSG00000105547	1.79769	9.11742e-05	0.00255981	Iglc3
ENSMUSG00000094006	2.78284	9.4124e-05	0.00263862	Igkv4-59
ENSMUSG00000038026	-4.60833	9.54815e-05	0.00267261	Kcnj9
ENSMUSG00000017716	1.96787	9.65805e-05	0.00269521	Birc5
ENSMUSG00000030310	-7.78278	9.69575e-05	0.00270165	Slc6a1
ENSMUSG00000053646	-5.76689	9.95937e-05	0.00277093	Plxnb1
ENSMUSG00000003545	1.81845	0.000100248	0.00278075	Fosb
ENSMUSG00000093894	2.27715	0.000100831	0.00278856	Ighv1-53
ENSMUSG00000076749	1.97508	0.000102489	0.00282593	Trgc1
ENSMUSG00000096410	3.08815	0.000102352	0.00282593	Ighv1-19
ENSMUSG00000097445	-1.98518	0.00010413	0.00286691	Gm26631
ENSMUSG00000093896	3.32989	0.000104415	0.00287047	Ighv1-76
ENSMUSG00000030149	1.54859	0.000104625	0.00287197	Klrk1
ENSMUSG00000020185	3.79348	0.00010509	0.00288047	E2f7
ENSMUSG00000050982	7.2641	0.000106086	0.00289917	Apol10a
ENSMUSG00000110558	-2.54649	0.00010933	0.00297461	Gm45779
ENSMUSG00000041782	-1.90691	0.000109786	0.00298183	Lad1
ENSMUSG00000120697	1.65253	0.000109918	0.00298183	Gm36496
ENSMUSG00000032908	3.29427	0.000112844	0.00305225	Sgpp2
ENSMUSG00000096805	3.26734	0.000113505	0.00306564	Ighv9-1
ENSMUSG00000024672	-1.64824	0.000114061	0.0030672	Ms4a7
ENSMUSG00000109036	-1.85098	0.000116093	0.00311277	2210406H18Rik
ENSMUSG00000074215	2.8756	0.000117737	0.00314773	Gm10643
ENSMUSG00000030064	-1.50932	0.00011831	0.00315847	Frmd4b
ENSMUSG00000079018	1.85129	0.000122474	0.00325552	Ly6c1
ENSMUSG00000049988	-1.60116	0.000123725	0.00327935	Lrrc25
ENSMUSG00000026220	-7.65747	0.000124151	0.0032859	Slc16a14
ENSMUSG00000026605	2.62933	0.000129549	0.00341412	Cenpf
ENSMUSG00000069273	1.63779	0.000131389	0.00345766	H3c6
ENSMUSG00000095351	3.45955	0.000132727	0.00348791	Igkv3-2
ENSMUSG00000022496	4.23277	0.000136396	0.00357417	Tnfrsf17
ENSMUSG00000045573	2.38559	0.000137691	0.00360297	Penk
ENSMUSG00000050241	2.86733	0.000138764	0.00361224	Klre1
ENSMUSG00000026683	1.50119	0.000139351	0.00362078	Nuf2
ENSMUSG00000026981	-2.25067	0.000143009	0.00370539	Il1rn
ENSMUSG00000085881	-6.55276	0.000144357	0.00373508	Gm15912
ENSMUSG00000040522	-2.55693	0.000144943	0.00374499	Tlr8
ENSMUSG00000073412	-1.92946	0.00014543	0.00375233	Lst1
ENSMUSG00000074472	-6.71155	0.000146308	0.00376972	Zfp872
ENSMUSG00000073555	1.91507	0.000148268	0.00381491	Gm4951
ENSMUSG00000036223	2.27493	0.000152001	0.00390553	Ska1
ENSMUSG00000030867	1.57563	0.000152226	0.00390587	Plk1
ENSMUSG00000014846	2.24994	0.000152984	0.00391443	Tppp3
ENSMUSG00000061666	-1.88587	0.000153377	0.00391906	Gdpd1
ENSMUSG00000076526	3.79685	0.000154657	0.00394542	Igkv12-98
ENSMUSG00000053702	2.11138	0.000155518	0.00395735	Nebl
ENSMUSG00000023473	-7.26909	0.000156272	0.00397107	Celsr3
ENSMUSG00000028736	-6.30065	0.000158868	0.00402595	Pax7
ENSMUSG00000042770	-1.67615	0.000159633	0.00403982	Hebp1
ENSMUSG00000079543	3.03562	0.000160029	0.0040443	Igkv13-85
ENSMUSG00000095514	3.36169	0.000165539	0.00416077	D13Ertd608e
ENSMUSG00000076666	2.91784	0.000166028	0.00416517	Ighv14-4
ENSMUSG00000061878	5.06909	0.000169586	0.00423369	Sphk1
ENSMUSG00000000320	-1.97472	0.000172755	0.00430118	Alox12
ENSMUSG00000076580	2.43959	0.000174523	0.00433936	Igkv8-27
ENSMUSG00000056054	-3.03458	0.000175812	0.00436552	S100a8
ENSMUSG00000076555	2.45934	0.000180382	0.00446329	Igkv4-57-1
ENSMUSG00000039217	-1.61955	0.000180864	0.00446329	Il18
ENSMUSG00000100210	1.74547	0.000180744	0.00446329	H3c7
ENSMUSG00000001156	-1.74524	0.000182042	0.0044769	Mxd1
ENSMUSG00000039497	-1.68708	0.000183181	0.00449414	Dse
ENSMUSG00000037474	1.76524	0.000184346	0.00451025	Dtl
ENSMUSG00000074622	-2.33295	0.000184645	0.00451025	Mafb
ENSMUSG00000109086	2.57294	0.000185244	0.00451025	Gm5596
ENSMUSG00000059824	-1.85275	0.000185303	0.00451025	Dbp
ENSMUSG00000094124	3.19822	0.000185215	0.00451025	Ighv1-74
ENSMUSG00000085133	2.9873	0.000187374	0.00454867	B930095G15Rik
ENSMUSG00000110902	1.71551	0.000188378	0.0045551	Gm33104
ENSMUSG00000025804	-2.29452	0.000188362	0.0045551	Ccr1
ENSMUSG00000094027	2.90881	0.000190291	0.00458935	Gm21762
ENSMUSG00000062312	-3.51734	0.000193273	0.00465518	Erbb2
ENSMUSG00000022788	-2.71697	0.000197066	0.00474036	Fgd4
ENSMUSG00000051397	-2.15237	0.000199489	0.00479242	Tacstd2
ENSMUSG00000043940	-1.95571	0.000205766	0.00493233	Wdfy3
ENSMUSG00000060591	-2.21054	0.000205847	0.00493233	Ifitm2
ENSMUSG00000029925	-1.62911	0.000211111	0.00503884	Tbxas1
ENSMUSG00000056529	-1.61775	0.0002122	0.00505831	Ptafr
ENSMUSG00000031012	-1.78041	0.000213374	0.00506016	Cask
ENSMUSG00000117442	6.31103	0.00021269	0.00506016	1810073O08Rik
ENSMUSG00000027737	-2.47745	0.000214671	0.0050844	Slc7a11
ENSMUSG00000102881	6.10051	0.000221845	0.00523417	Gm3807
ENSMUSG00000027695	-2.93502	0.000222275	0.00523764	Pld1
ENSMUSG00000098207	-5.99781	0.000224956	0.00528061	Arl14
ENSMUSG00000009092	1.76644	0.000226012	0.00529867	Derl3
ENSMUSG00000031555	-1.6269	0.00023012	0.00538813	Adam9
ENSMUSG00000010307	-1.51147	0.000231838	0.00542149	Tmem86a
ENSMUSG00000025375	-3.16674	0.000235894	0.00549546	Aatk
ENSMUSG00000020072	-5.18507	0.000238808	0.00555636	Pbld2
ENSMUSG00000076605	2.36298	0.000248853	0.00574665	Igkj2
ENSMUSG00000006930	-1.71896	0.00025131	0.0057889	Hap1
ENSMUSG00000120054	5.90831	0.000252533	0.00579539	Gm57214
ENSMUSG00000096715	2.55155	0.000252986	0.00579859	Igkv3-4
ENSMUSG00000094862	6.35821	0.000255292	0.00582976	Ighv1-56
ENSMUSG00000075702	3.03636	0.000259227	0.00591229	Selenom
ENSMUSG00000046908	-2.43301	0.000266978	0.00608157	Ltb4r1
ENSMUSG00000089809	-1.52148	0.000275993	0.00625607	Rasgef1b
ENSMUSG00000029135	-1.62073	0.000285497	0.00644776	Fosl2
ENSMUSG00000076545	2.03033	0.000285284	0.00644776	Igkv4-72
ENSMUSG00000020023	-1.91129	0.000290817	0.00655875	Tmcc3
ENSMUSG00000037185	-2.08381	0.000296139	0.00666368	Krt80
ENSMUSG00000101517	-6.06535	0.00029965	0.00673446	4732465J04Rik
ENSMUSG00000076615	2.72925	0.000303846	0.00680394	Ighg3
ENSMUSG00000039956	-2.38402	0.000304238	0.00680448	Mrap
ENSMUSG00000071192	2.88018	0.000313158	0.00697862	Wfikkn1
ENSMUSG00000094940	3.0565	0.000318434	0.00707913	Ighv1-84
ENSMUSG00000103261	4.21983	0.000320245	0.00711083	Gm36981
ENSMUSG00000076671	3.29947	0.000321624	0.00713286	Ighv13-2
ENSMUSG00000056515	-1.73913	0.000322442	0.00714244	Rab31
ENSMUSG00000024353	1.79337	0.000325222	0.0071954	Mzb1
ENSMUSG00000094694	2.05878	0.000327461	0.00723626	Ighv1-9
ENSMUSG00000005237	-2.01878	0.000332227	0.00731533	Dnah2
ENSMUSG00000076218	-1.82763	0.000334353	0.00734464	Mir692-1
ENSMUSG00000022534	-1.73973	0.000335023	0.00735062	Mefv
ENSMUSG00000115222	-2.22618	0.000340295	0.00744859	Gm49747
ENSMUSG00000030786	-2.23893	0.000345348	0.00753241	Itgam
ENSMUSG00000051490	-3.3692	0.000353673	0.00769582	Foxd4
ENSMUSG00000076518	2.14491	0.00035421	0.00769844	Igkv2-112
ENSMUSG00000005533	-1.53762	0.000361469	0.00781942	Igf1r
ENSMUSG00000055013	-2.30157	0.000365773	0.00786647	Agap1
ENSMUSG00000042379	4.67769	0.000365447	0.00786647	Esm1
ENSMUSG00000033031	1.87087	0.000374877	0.00803419	Cip2a
ENSMUSG00000062470	4.49328	0.000378608	0.00810475	Fbxl12os
ENSMUSG00000095200	2.61652	0.000382598	0.00815238	Ighv1-7
ENSMUSG00000066755	-4.7438	0.000386917	0.00821396	Tnfsf18
ENSMUSG00000035158	-2.8176	0.000386671	0.00821396	Mitf
ENSMUSG00000076677	1.82016	0.000387267	0.00821396	Ighv6-3
ENSMUSG00000095794	2.55531	0.000417481	0.00882442	Igkv6-17
ENSMUSG00000094728	1.88761	0.000422007	0.00888958	NA
ENSMUSG00000001403	1.96044	0.000424224	0.0089261	Ube2c
ENSMUSG00000018593	-2.15192	0.000429336	0.00902338	Sparc
ENSMUSG00000085977	3.35387	0.000432383	0.0090771	Gm5970
ENSMUSG00000019942	1.67221	0.000435458	0.00913128	Cdk1
ENSMUSG00000085589	3.88877	0.000445095	0.00929117	A430078I02Rik
ENSMUSG00000023079	-1.57079	0.000448709	0.00934832	Gtf2ird1
ENSMUSG00000030147	-2.07311	0.000453265	0.00941915	Clec4b1
ENSMUSG00000106668	2.75714	0.000455391	0.00945269	Iglj1
ENSMUSG00000038665	-3.36417	0.000459524	0.00952777	Dgki
ENSMUSG00000095195	4.96596	0.0004643	0.009616	Gm3005
ENSMUSG00000030187	-1.90257	0.000472375	0.00975045	Klra2
ENSMUSG00000052749	-1.66638	0.000477975	0.00983861	Trim30b
ENSMUSG00000094689	2.84679	0.000478243	0.00983861	Ighv1-81
ENSMUSG00000040146	-2.98753	0.000479746	0.00985854	Rgl3
ENSMUSG00000020774	-3.08477	0.000484662	0.00994849	Aspa
ENSMUSG00000083907	-6.07464	0.00049141	0.0100313	Plk-ps1
ENSMUSG00000028718	2.25062	0.00049335	0.0100541	Stil
ENSMUSG00000040694	1.88107	0.000494162	0.0100541	Apobec2
ENSMUSG00000037095	-2.94316	0.000494042	0.0100541	Lrg1
ENSMUSG00000061086	1.90515	0.000497837	0.0101178	Myl4
ENSMUSG00000049314	7.4195	0.000506041	0.0102732	Fbxw13
ENSMUSG00000112290	2.29025	0.000531736	0.0106891	Gm33782
ENSMUSG00000104452	3.01782	0.000530771	0.0106891	Ighv8-8
ENSMUSG00000034329	1.76856	0.000532413	0.0106911	Brip1
ENSMUSG00000052572	-3.10113	0.00053416	0.0107029	Dlg2
ENSMUSG00000049119	-2.36578	0.000554037	0.0110175	Fam110b
ENSMUSG00000095737	4.10045	0.000558829	0.0110855	Igkv11-125
ENSMUSG00000076596	2.98428	0.000559253	0.0110855	Igkv3-10
ENSMUSG00000022074	-1.53452	0.00055858	0.0110855	Tnfrsf10b
ENSMUSG00000054046	5.73294	0.000562771	0.0111432	Klk13
ENSMUSG00000039831	-2.38397	0.000566765	0.0111983	Arhgap29
ENSMUSG00000092591	1.64618	0.000570883	0.0112493	Gm20429
ENSMUSG00000029915	-2.03422	0.000573089	0.011275	Clec5a
ENSMUSG00000020728	6.14285	0.00059225	0.0115536	Cep112
ENSMUSG00000041431	1.56975	0.000591585	0.0115536	Ccnb1
ENSMUSG00000025171	-1.64514	0.000595663	0.0115957	Ubtd1
ENSMUSG00000108291	-2.16623	0.000602048	0.0116953	Gm44292
ENSMUSG00000120135	2.31801	0.000607178	0.0117702	Gm57236
ENSMUSG00000102776	5.96788	0.00061129	0.0118375	Gm38162
ENSMUSG00000027715	1.54123	0.00061289	0.0118561	Ccna2
ENSMUSG00000030409	-2.04698	0.000613617	0.0118577	Dmpk
ENSMUSG00000120892	2.45755	0.000634689	0.0122393	Gm56995
ENSMUSG00000038146	6.33592	0.000640059	0.01233	Notch3
ENSMUSG00000022793	-1.63774	0.000641652	0.0123478	B4galt4
ENSMUSG00000031530	1.95815	0.000643373	0.012368	Dusp4
ENSMUSG00000039824	-1.99561	0.000644825	0.0123831	Myl6b
ENSMUSG00000038943	1.53179	0.00065133	0.0124511	Prc1
ENSMUSG00000116383	6.25713	0.000651739	0.0124511	Apol10c-ps
ENSMUSG00000021684	-1.99859	0.000656663	0.0125322	Pde8b
ENSMUSG00000031896	-1.79645	0.000665458	0.0126608	Ctrl
ENSMUSG00000050931	-2.88983	0.000666593	0.0126694	Sgms2
ENSMUSG00000078817	-3.33496	0.000676918	0.0127867	Nlrp12
ENSMUSG00000050538	1.79674	0.000680479	0.0128145	B230217C12Rik
ENSMUSG00000082870	-5.16405	0.000681163	0.0128145	Gm12165
ENSMUSG00000020961	-2.44477	0.000690171	0.0129707	Ston2
ENSMUSG00000030247	2.78641	0.000693266	0.0130156	Kcnj8
ENSMUSG00000096670	2.68458	0.000695114	0.0130371	Ighv2-6
ENSMUSG00000095700	2.37099	0.000696938	0.0130581	Ighv10-3
ENSMUSG00000002190	6.97909	0.000705196	0.013186	Clgn
ENSMUSG00000030272	-2.0734	0.000706822	0.013201	Camk1
ENSMUSG00000027360	-2.55358	0.000708325	0.0132044	Hdc
ENSMUSG00000027398	-2.31702	0.00070916	0.0132067	Il1b
ENSMUSG00000019558	6.30407	0.000710776	0.0132159	Slc6a8
ENSMUSG00000026390	-1.63338	0.000714995	0.0132682	Marco
ENSMUSG00000051747	1.77975	0.000718672	0.0133033	Ttn
ENSMUSG00000090192	-3.87057	0.000718235	0.0133033	Gm16556
ENSMUSG00000037161	5.41054	0.000720948	0.0133321	Mgarp
ENSMUSG00000036912	6.33314	0.000737481	0.0135699	Piwil4
ENSMUSG00000027253	-2.31494	0.000742316	0.0136453	Lrp4
ENSMUSG00000071324	-2.9402	0.000745831	0.0136585	Armc2
ENSMUSG00000020810	-3.10408	0.000743861	0.0136585	Cygb
ENSMUSG00000044676	-6.01573	0.000749173	0.0136896	Zfp612
ENSMUSG00000020376	-1.55363	0.000748456	0.0136896	Rnf130
ENSMUSG00000035493	-1.53447	0.00077847	0.0141272	Tgfbi
ENSMUSG00000040264	3.60013	0.000779693	0.0141355	Gbp2b
ENSMUSG00000094262	6.28207	0.000790722	0.0142933	Igkv4-62
ENSMUSG00000041797	-3.23688	0.000801083	0.0144101	Abca9
ENSMUSG00000097207	-3.74471	0.000885955	0.0157984	6030443J06Rik
ENSMUSG00000104020	4.89951	0.000890396	0.015847	Gm37215
ENSMUSG00000035773	-3.52593	0.000893575	0.0158883	Kiss1r
ENSMUSG00000120049	5.2801	0.000930492	0.0164654	Gm57109
ENSMUSG00000070360	-5.49086	0.000933633	0.0165052	Amy2a1
ENSMUSG00000096326	3.0376	0.000939915	0.0165845	Ighv1-78
ENSMUSG00000053528	-1.93224	0.000949005	0.016713	A530021J07Rik
ENSMUSG00000042262	2.5597	0.000963041	0.0169279	Ccr8
ENSMUSG00000061751	-3.24849	0.000970716	0.0170304	Kalrn
ENSMUSG00000117575	5.3038	0.000972485	0.0170452	Gm36486
ENSMUSG00000108861	-5.05352	0.000985192	0.0172317	5930435M05Rik
ENSMUSG00000071637	-2.94944	0.00098592	0.0172317	Cebpd
ENSMUSG00000052942	-3.99868	0.00100133	0.0174514	Glis3
ENSMUSG00000104546	2.02954	0.00101016	0.0175557	Gm43858
ENSMUSG00000046470	-6.43292	0.00101688	0.0176393	Sox18
ENSMUSG00000030170	-5.78332	0.00101989	0.0176749	Wnt5b
ENSMUSG00000039748	2.12146	0.00102575	0.0177599	Exo1
ENSMUSG00000112547	2.05169	0.00103642	0.0178609	Gm47096
ENSMUSG00000031119	-3.03353	0.00106786	0.0183672	Gpc4
ENSMUSG00000035783	-2.13551	0.00106879	0.0183672	Acta2
ENSMUSG00000017057	-1.90257	0.00107242	0.0183954	Il13ra1
ENSMUSG00000105462	2.85745	0.00107646	0.0184134	Igkv4-77
ENSMUSG00000120746	2.93956	0.00110483	0.0188117	Gm56841
ENSMUSG00000113003	-2.61674	0.00111101	0.0188994	Gm47138
ENSMUSG00000048442	2.10464	0.00112111	0.0190188	Smim5
ENSMUSG00000030339	-2.18176	0.00114194	0.0193543	Ltbr
ENSMUSG00000030340	-2.23518	0.0011567	0.0195507	Scnn1a
ENSMUSG00000039116	-2.61149	0.00117005	0.0197583	Adgrg6
ENSMUSG00000015880	1.57402	0.00118283	0.0199357	Ncapg
ENSMUSG00000095335	2.28106	0.001188	0.0199883	Igkv3-5
ENSMUSG00000041754	-2.13176	0.00119433	0.02004	Trem3
ENSMUSG00000054206	1.71653	0.00122135	0.0204193	Gzmm
ENSMUSG00000008153	6.05164	0.00123549	0.0205996	Clstn3
ENSMUSG00000121011	-3.18239	0.0012379	0.0206078	Gm56975
ENSMUSG00000016024	-1.91036	0.00124385	0.0206436	Lbp
ENSMUSG00000064246	-2.39857	0.00124802	0.0206779	Chil1
ENSMUSG00000096490	2.15064	0.00125288	0.0207213	Igkv10-94
ENSMUSG00000098889	-1.6261	0.00126524	0.0208511	Gm27206
ENSMUSG00000097115	5.41793	0.00126509	0.0208511	1810019N24Rik
ENSMUSG00000021375	-1.7738	0.00128925	0.0211149	Kif13a
ENSMUSG00000074361	-2.74188	0.00131224	0.0214154	C5ar2
ENSMUSG00000112714	-3.98245	0.00132691	0.0215977	Gm4798
ENSMUSG00000033705	-1.90186	0.00132951	0.0216208	Stard9
ENSMUSG00000044165	-3.41352	0.00133578	0.0217038	Bcl2l15
ENSMUSG00000072980	1.64762	0.00133964	0.0217474	Oip5
ENSMUSG00000034783	-2.17039	0.00135247	0.021898	Cd207
ENSMUSG00000016255	-1.93665	0.0013574	0.0219193	Tubb1
ENSMUSG00000023022	-1.78912	0.00136108	0.0219221	Lima1
ENSMUSG00000036295	-2.12404	0.00136431	0.0219549	Lrrn3
ENSMUSG00000104369	-1.68812	0.00138323	0.0221821	Gm38082
ENSMUSG00000008540	-1.61968	0.00138268	0.0221821	Mgst1
ENSMUSG00000109245	-3.35825	0.00138157	0.0221821	Gm44860
ENSMUSG00000023467	1.68254	0.00139584	0.0223649	Tulp2
ENSMUSG00000103957	5.35671	0.00141449	0.0225853	Gm10766
ENSMUSG00000030981	5.18441	0.00141446	0.0225853	Mmp21
ENSMUSG00000033278	-3.3727	0.0014196	0.0226474	Ptprm
ENSMUSG00000049916	1.67436	0.00143246	0.0228131	2610318N02Rik
ENSMUSG00000084862	5.04874	0.00143923	0.0229012	Gm16278
ENSMUSG00000030954	-2.69743	0.00144429	0.0229422	Gp2
ENSMUSG00000120524	5.50372	0.00144609	0.0229511	Gm57209
ENSMUSG00000017969	-1.74007	0.00147585	0.0234033	Ptgis
ENSMUSG00000084020	6.22903	0.00150798	0.0238446	Wsb2-ps
ENSMUSG00000094117	2.1575	0.00151655	0.0239255	Igkv3-12
ENSMUSG00000037346	5.83849	0.00152306	0.0240077	Hrh4
ENSMUSG00000096638	2.12831	0.00153211	0.0241091	Ighv2-9
ENSMUSG00000044092	-2.09448	0.00156237	0.0245226	C130050O18Rik
ENSMUSG00000028864	-3.51959	0.00157553	0.0246873	Hgf
ENSMUSG00000102863	2.48065	0.00158539	0.0247889	Gm37639
ENSMUSG00000109799	5.91722	0.0016222	0.0252472	Gm45515
ENSMUSG00000047945	-1.54823	0.00163713	0.0254564	Marcksl1
ENSMUSG00000013611	-3.2056	0.00168577	0.0260392	Snx31
ENSMUSG00000000359	-2.20025	0.00169079	0.0260949	Rem1
ENSMUSG00000103030	3.19922	0.00169583	0.0261291	E330011M16Rik
ENSMUSG00000020826	4.23717	0.00169749	0.0261329	Nos2
ENSMUSG00000104340	4.29703	0.00170565	0.0262148	Gm10522
ENSMUSG00000035863	-2.26122	0.00170499	0.0262148	Palm
ENSMUSG00000057286	-2.67338	0.00173086	0.026514	St6galnac2
ENSMUSG00000094502	2.81829	0.00173805	0.0266021	Ighv1-69
ENSMUSG00000072949	-2.10502	0.00176238	0.0269522	Acot1
ENSMUSG00000033578	-6.29219	0.00176476	0.0269662	Tmem35a
ENSMUSG00000094509	2.39268	0.00177231	0.0270592	Ighv14-1
ENSMUSG00000041633	-1.837	0.00177865	0.0270889	Kctd12b
ENSMUSG00000095761	3.34978	0.00179949	0.0273108	Ighv1-20
ENSMUSG00000036928	5.8612	0.00180438	0.0273454	Stag3
ENSMUSG00000029875	4.87455	0.0018103	0.0274126	Ccdc184
ENSMUSG00000060509	1.52382	0.00183072	0.0276244	Xcr1
ENSMUSG00000083534	6.00795	0.00183176	0.0276244	H2-M6-ps
ENSMUSG00000094198	3.28952	0.00184116	0.0276983	Ighv1-50
ENSMUSG00000031523	-3.17169	0.00184982	0.0277608	Dlc1
ENSMUSG00000002111	-1.52318	0.00185319	0.0277888	Spi1
ENSMUSG00000020599	-3.48801	0.00186174	0.0278718	Rgs9
ENSMUSG00000022385	1.50724	0.0018697	0.0279683	Gtse1
ENSMUSG00000076745	2.85774	0.0018797	0.0280271	Trgv4
ENSMUSG00000011463	-5.39709	0.00190631	0.0283731	Cpb1
ENSMUSG00000015202	-1.85791	0.00191063	0.0283958	Cnksr3
ENSMUSG00000027073	2.44453	0.00192059	0.0284679	Prg2
ENSMUSG00000059027	6.02867	0.00192159	0.0284679	9630013D21Rik
ENSMUSG00000043079	2.40249	0.00193052	0.0285773	Synpo
ENSMUSG00000001768	-1.9451	0.00198144	0.0292507	Rin2
ENSMUSG00000103672	5.28567	0.0019871	0.0292507	Gm37621
ENSMUSG00000005124	4.79125	0.00198604	0.0292507	Ccn4
ENSMUSG00000039166	-1.79599	0.00206631	0.0302361	Akap7
ENSMUSG00000032192	1.59386	0.00206713	0.0302361	Gnb5
ENSMUSG00000118078	2.56066	0.00207103	0.0302691	Gm50228
ENSMUSG00000031139	-4.0585	0.00207537	0.0303086	Mcf2
ENSMUSG00000026463	1.74635	0.00210014	0.0305256	Atp2b4
ENSMUSG00000027488	-2.45336	0.00210863	0.0306009	Snta1
ENSMUSG00000050103	-2.5571	0.00211499	0.030669	Agmo
ENSMUSG00000035365	1.93605	0.00213928	0.0309727	Parpbp
ENSMUSG00000027075	2.03412	0.00219768	0.0316199	Slc43a1
ENSMUSG00000019851	4.56355	0.0022173	0.0318525	Perp
ENSMUSG00000039270	-2.54572	0.00222485	0.0319363	Megf9
ENSMUSG00000034958	2.81248	0.0022345	0.0320329	Atcay
ENSMUSG00000025064	-5.503	0.00223505	0.0320329	Col17a1
ENSMUSG00000018417	-4.97852	0.00223824	0.0320537	Myo1b
ENSMUSG00000114995	-3.89153	0.0022466	0.0320739	Gm49284
ENSMUSG00000104769	3.86239	0.00226576	0.0322976	Igkv8-34
ENSMUSG00000096993	2.92036	0.00227843	0.0324299	Gm26787
ENSMUSG00000058773	2.73402	0.00229909	0.0326544	H1f5
ENSMUSG00000000127	-2.22763	0.00231722	0.0328788	Fer
ENSMUSG00000009248	-5.30149	0.00231959	0.0328873	Ascl2
ENSMUSG00000097569	2.26188	0.00232645	0.0329419	Gm26640
ENSMUSG00000021136	6.29822	0.00236541	0.0333992	Smoc1
ENSMUSG00000027399	-1.92454	0.0023915	0.0335511	Il1a
ENSMUSG00000085808	4.49197	0.00239183	0.0335511	Gm14718
ENSMUSG00000034023	1.96015	0.00244662	0.0342156	Fancd2
ENSMUSG00000101585	-1.72802	0.0024452	0.0342156	1600010M07Rik
ENSMUSG00000031216	-2.5533	0.00245497	0.0342792	Stard8
ENSMUSG00000022237	-2.80765	0.00245673	0.0342792	Ankrd33b
ENSMUSG00000024985	-1.55058	0.00246528	0.0343725	Tcf7l2
ENSMUSG00000078867	-4.34995	0.0024806	0.03456	Gm14418
ENSMUSG00000074281	-6.30239	0.00254164	0.0353039	Gm12522
ENSMUSG00000031202	3.18252	0.00256444	0.0354607	Rab39b
ENSMUSG00000121040	4.88356	0.00256348	0.0354607	Gm57305
ENSMUSG00000035936	-5.77718	0.00256061	0.0354607	Aldh5a1
ENSMUSG00000095612	1.9198	0.00256231	0.0354607	Ighv5-4
ENSMUSG00000024659	-1.7035	0.00256114	0.0354607	Anxa1
ENSMUSG00000074634	-2.69176	0.00263856	0.0363495	Tmem267
ENSMUSG00000015843	-4.40749	0.00266869	0.0367372	Rxrg
ENSMUSG00000018459	-5.15498	0.0026776	0.0368325	Slc13a3
ENSMUSG00000095450	1.7261	0.00268334	0.0368839	NA
ENSMUSG00000042807	-2.49356	0.00271987	0.0372751	Hecw2
ENSMUSG00000034039	-3.07241	0.00274719	0.0375659	Prss29
ENSMUSG00000105646	1.50044	0.00275175	0.0376004	Gm30211
ENSMUSG00000031791	-1.69687	0.00276492	0.0377246	Tmem38a
ENSMUSG00000000204	-2.58527	0.00281011	0.0381159	Slfn4
ENSMUSG00000000982	2.08658	0.00281367	0.0381362	Ccl3
ENSMUSG00000035683	1.51412	0.00284228	0.0383552	Melk
ENSMUSG00000083282	-1.74162	0.00284844	0.0383946	Ctsf
ENSMUSG00000076800	1.53805	0.00286636	0.0385113	Trav6n-5
ENSMUSG00000115340	-4.98271	0.00286541	0.0385113	Gm48965
ENSMUSG00000052234	7.69675	0.00288259	0.0386451	Epx
ENSMUSG00000052727	-6.31522	0.00288171	0.0386451	Map1b
ENSMUSG00000090185	-1.78961	0.00290265	0.0388606	Gm15523
ENSMUSG00000043794	1.65172	0.00292996	0.0391665	D830025C05Rik
ENSMUSG00000040026	3.32049	0.00295532	0.03942	Saa3
ENSMUSG00000028175	1.62059	0.00297496	0.0396206	Depdc1a
ENSMUSG00000031596	-2.59076	0.0029768	0.0396206	Slc7a2
ENSMUSG00000063611	-2.40443	0.00299046	0.0397738	Gm10134
ENSMUSG00000095338	6.68237	0.00300755	0.0399435	Igkv3-9
ENSMUSG00000039109	-2.63548	0.0030495	0.0403267	F13a1
ENSMUSG00000025701	-2.60872	0.00305188	0.0403293	Alox5
ENSMUSG00000117485	-2.88427	0.00306545	0.0404798	Gm19696
ENSMUSG00000021281	-1.75874	0.00313138	0.0412619	Tnfaip2
ENSMUSG00000106103	-5.12744	0.00314154	0.0412884	Gm43081
ENSMUSG00000108436	3.9794	0.00313864	0.0412884	Gm44851
ENSMUSG00000055022	5.33349	0.00314546	0.0413001	Cntn1
ENSMUSG00000102364	2.65118	0.0031625	0.0414649	Ighv8-5
ENSMUSG00000056071	-2.59947	0.00317476	0.0415961	S100a9
ENSMUSG00000076608	1.76487	0.00321349	0.0419325	Igkj5
ENSMUSG00000063234	-5.34734	0.00321405	0.0419325	Gpr84
ENSMUSG00000065176	1.87105	0.00328105	0.042669	Rnu12
ENSMUSG00000074268	-5.12681	0.00328851	0.0426929	Amy2a5
ENSMUSG00000010830	5.91484	0.00331387	0.0429618	Kdelr3
ENSMUSG00000096770	-5.12277	0.00334725	0.0432735	Amy2a4
ENSMUSG00000093931	-5.12277	0.00334761	0.0432735	Amy2a3
ENSMUSG00000096569	-5.12277	0.00334843	0.0432735	Amy2a2
ENSMUSG00000029373	-2.21912	0.00335092	0.0432735	Pf4
ENSMUSG00000041064	2.38489	0.00339268	0.0437378	Pif1
ENSMUSG00000096908	1.80157	0.00339648	0.0437563	Trav7-3
ENSMUSG00000063177	3.6547	0.00342775	0.0440669	Klk1b27
ENSMUSG00000036585	-2.40511	0.00347547	0.0445874	Fgf1
ENSMUSG00000052392	-6.86933	0.00355369	0.0454646	Acot4
ENSMUSG00000020102	-2.34178	0.003572	0.0456672	Slc16a7
ENSMUSG00000076540	2.69079	0.00359064	0.0458738	Igkv4-80
ENSMUSG00000097266	5.29349	0.0036015	0.0459807	Gm26802
ENSMUSG00000095863	3.08428	0.00362203	0.0462109	Ighv1-67
ENSMUSG00000109157	2.77723	0.00364208	0.0463707	Gm44829
ENSMUSG00000096010	2.03454	0.00364983	0.0464373	H4c16
ENSMUSG00000029121	1.52011	0.00366142	0.0465527	Crmp1
ENSMUSG00000022586	1.72657	0.0036641	0.0465548	Ly6i
ENSMUSG00000101496	2.46849	0.00368788	0.0467598	Gm8885
ENSMUSG00000005640	6.16851	0.00369353	0.0467598	Insrr
ENSMUSG00000121125	3.74576	0.00369597	0.0467598	Gm38883
ENSMUSG00000108456	-3.17482	0.00369796	0.0467598	4732496C06Rik
ENSMUSG00000015305	-2.81933	0.00369284	0.0467598	Sash1
ENSMUSG00000025140	2.14285	0.0037147	0.0469394	Pycr1
ENSMUSG00000042265	-2.8045	0.00372585	0.0470125	Trem1
ENSMUSG00000053004	-2.7551	0.00378787	0.0475065	Hrh1
ENSMUSG00000061353	-3.11143	0.00378086	0.0475065	Cxcl12
ENSMUSG00000069309	4.15675	0.00378416	0.0475065	H2ac22
ENSMUSG00000096498	2.35536	0.0037877	0.0475065	Ighv2-5
ENSMUSG00000096461	3.59545	0.00383615	0.0480143	Igkv14-130
ENSMUSG00000020330	1.8353	0.00386683	0.0483327	Hmmr
ENSMUSG00000068101	1.58264	0.00387133	0.0483563	Cenpm
ENSMUSG00000033952	1.98994	0.00390277	0.0486503	Aspm
ENSMUSG00000076562	2.67428	0.00395358	0.049085	Igkv4-50
ENSMUSG00000026073	-2.05804	0.00396796	0.0491644	Il1r2
ENSMUSG00000097378	-2.69328	0.00396599	0.0491644	B230208H11Rik
ENSMUSG00000031765	-1.63132	0.00398678	0.0493645	Mt1
ENSMUSG00000058728	1.733	0.00404283	0.049958	Cd300c

## Sheet: 8wk time course - Fig 2e
GeneID	clusters	Symbol
ENSMUSG00000045009	A	Prrt3
ENSMUSG00000020419	A	Hormad2
ENSMUSG00000117313	A	Gm49838
ENSMUSG00000029163	A	Emilin1
ENSMUSG00000039813	A	Tbc1d2
ENSMUSG00000121211	A	Gm57458
ENSMUSG00000055027	A	Smyd1
ENSMUSG00000097081	A	Gm10425
ENSMUSG00000085673	A	Gm16122
ENSMUSG00000050195	A	Scd4
ENSMUSG00000097113	A	Gm19705
ENSMUSG00000074874	A	Ctla2b
ENSMUSG00000042213	A	Zfand4
ENSMUSG00000029561	A	Oasl2
ENSMUSG00000004864	A	Mapk13
ENSMUSG00000074604	A	Mgst2
ENSMUSG00000028613	A	Lrp8
ENSMUSG00000032591	A	Mst1
ENSMUSG00000006179	A	Prss16
ENSMUSG00000015981	A	Stk32c
ENSMUSG00000039578	A	Ccser1
ENSMUSG00000029816	A	Gpnmb
ENSMUSG00000051000	A	Fhip1a
ENSMUSG00000040298	A	Btbd16
ENSMUSG00000074170	A	Plekhf1
ENSMUSG00000051111	A	Sv2c
ENSMUSG00000076668	A	Ighv7-4
ENSMUSG00000054672	A	Scart2
ENSMUSG00000022580	A	Rhpn1
ENSMUSG00000029102	A	Hgfac
ENSMUSG00000021675	A	F2rl2
ENSMUSG00000044258	A	Ctla2a
ENSMUSG00000061815	A	Rufy4
ENSMUSG00000027313	A	Chac1
ENSMUSG00000022768	A	Ccdc116
ENSMUSG00000019996	A	Map7
ENSMUSG00000067297	A	Ifit1bl2
ENSMUSG00000019312	A	Grb7
ENSMUSG00000105879	A	Gm6204
ENSMUSG00000116380	A	Gm39556
ENSMUSG00000033147	A	Slc22a15
ENSMUSG00000116220	A	A430088P11Rik
ENSMUSG00000120586	A	Gm56830
ENSMUSG00000045934	A	Mtmr11
ENSMUSG00000120131	A	Gm56844
ENSMUSG00000049916	A	2610318N02Rik
ENSMUSG00000016529	A	Il10
ENSMUSG00000086083	A	Gm15829
ENSMUSG00000074923	A	Pak6
ENSMUSG00000028367	A	Txn1
ENSMUSG00000001025	A	S100a6
ENSMUSG00000005824	A	Tnfsf14
ENSMUSG00000020439	A	Smtn
ENSMUSG00000121499	A	Ly6a2
ENSMUSG00000030413	A	Pglyrp1
ENSMUSG00000070304	A	Scn2b
ENSMUSG00000034612	A	Chst11
ENSMUSG00000078994	A	Zfp429
ENSMUSG00000018648	A	Dusp14
ENSMUSG00000026090	A	Cracdl
ENSMUSG00000029001	A	Fbxo44
ENSMUSG00000084806	A	Gm15232
ENSMUSG00000026573	A	Xcl1
ENSMUSG00000037535	A	1700021A07Rik
ENSMUSG00000024424	A	Ttc39c
ENSMUSG00000110902	A	Gm33104
ENSMUSG00000030107	A	Usp18
ENSMUSG00000026285	A	Pdcd1
ENSMUSG00000035148	A	Gpr33
ENSMUSG00000022584	A	Ly6c2
ENSMUSG00000112230	A	Ifngas1
ENSMUSG00000054072	A	Iigp1
ENSMUSG00000026011	A	Ctla4
ENSMUSG00000054206	A	Gzmm
ENSMUSG00000050232	A	Cxcr3
ENSMUSG00000023960	A	Enpp5
ENSMUSG00000028943	A	Espn
ENSMUSG00000039410	A	Prdm16
ENSMUSG00000033470	A	Cysltr2
ENSMUSG00000026068	A	Il18rap
ENSMUSG00000051354	A	Samd3
ENSMUSG00000033538	A	Casp4
ENSMUSG00000062995	A	Ica1
ENSMUSG00000027983	A	Cyp2u1
ENSMUSG00000021846	A	Peli2
ENSMUSG00000092178	A	Gm45351
ENSMUSG00000021594	A	Srd5a1
ENSMUSG00000024190	A	Dusp1
ENSMUSG00000000157	A	Itgb2l
ENSMUSG00000112023	A	Lilrb4b
ENSMUSG00000112148	A	Lilrb4a
ENSMUSG00000117315	A	1600022D10Rik
ENSMUSG00000090439	A	Gm17455
ENSMUSG00000039899	A	Fgl2
ENSMUSG00000014599	A	Csf1
ENSMUSG00000059430	A	Actg2
ENSMUSG00000113136	A	Gm19951
ENSMUSG00000121505	A	Gm4956
ENSMUSG00000067613	A	Krt83
ENSMUSG00000025876	A	Unc5a
ENSMUSG00000050989	A	Selenon
ENSMUSG00000061751	A	Kalrn
ENSMUSG00000022582	A	Ly6g
ENSMUSG00000038357	A	Camp
ENSMUSG00000032496	A	Ltf
ENSMUSG00000040809	A	Chil3
ENSMUSG00000026822	A	Lcn2
ENSMUSG00000032484	A	Ngp
ENSMUSG00000052212	A	Cd177
ENSMUSG00000024659	A	Anxa1
ENSMUSG00000022651	A	Retnlg
ENSMUSG00000046908	A	Ltb4r1
ENSMUSG00000005800	A	Mmp8
ENSMUSG00000056054	A	S100a8
ENSMUSG00000056071	A	S100a9
ENSMUSG00000035783	A	Acta2
ENSMUSG00000058755	A	Osm
ENSMUSG00000071343	A	Gm10327
ENSMUSG00000000204	A	Slfn4
ENSMUSG00000031825	A	Crispld2
ENSMUSG00000043953	A	Ccrl2
ENSMUSG00000102425	A	Gm26616
ENSMUSG00000063628	A	Gm7665
ENSMUSG00000021250	A	Fos
ENSMUSG00000058427	A	Cxcl2
ENSMUSG00000023045	A	Soat2
ENSMUSG00000022126	A	Acod1
ENSMUSG00000033213	A	AA467197
ENSMUSG00000115505	A	Gm9247
ENSMUSG00000070490	A	Gm10293
ENSMUSG00000052727	A	Map1b
ENSMUSG00000086158	A	Pierce2
ENSMUSG00000027463	A	Slc52a3
ENSMUSG00000097487	A	Ptges3l
ENSMUSG00000083022	B	Rps15a-ps6
ENSMUSG00000095865	B	Gm13237
ENSMUSG00000066362	B	Rps13-ps1
ENSMUSG00000081087	B	Rps15a-ps7
ENSMUSG00000067058	B	Rps15a-ps5
ENSMUSG00000095863	B	Ighv1-67
ENSMUSG00000063903	B	Klk1
ENSMUSG00000040498	B	Igsf23
ENSMUSG00000007783	B	Cpt1c
ENSMUSG00000117871	B	Gm50287
ENSMUSG00000031495	B	Cd209d
ENSMUSG00000033427	B	Upb1
ENSMUSG00000095514	B	D13Ertd608e
ENSMUSG00000094027	B	Gm21762
ENSMUSG00000063388	B	BC023105
ENSMUSG00000076848	B	Trav15-2-dv6-2
ENSMUSG00000108601	B	Gm44645
ENSMUSG00000111758	B	Gm30373
ENSMUSG00000094370	B	Gm3373
ENSMUSG00000096003	B	Gm3500
ENSMUSG00000096908	B	Trav7-3
ENSMUSG00000104876	B	Trdc
ENSMUSG00000030208	B	Emp1
ENSMUSG00000058287	B	Gm12253
ENSMUSG00000036928	B	Stag3
ENSMUSG00000040264	B	Gbp2b
ENSMUSG00000056671	B	Prelid2
ENSMUSG00000101496	B	Gm8885
ENSMUSG00000069309	B	H2ac22
ENSMUSG00000074479	B	Rtraf-ps
ENSMUSG00000079396	B	Gm3411
ENSMUSG00000086037	B	Gm16085
ENSMUSG00000044788	B	Fads6
ENSMUSG00000085808	B	Gm14718
ENSMUSG00000050014	B	Apol10b
ENSMUSG00000096649	B	Ighv1-31
ENSMUSG00000023078	B	Cxcl13
ENSMUSG00000106874	B	Gm20186
ENSMUSG00000087060	B	Eldr
ENSMUSG00000069515	B	Lyz1
ENSMUSG00000004668	B	Abca13
ENSMUSG00000079222	B	NA
ENSMUSG00000049103	B	Ccr2
ENSMUSG00000095079	B	Igha
ENSMUSG00000042385	B	Gzmk
ENSMUSG00000000318	B	Clec10a
ENSMUSG00000112808	B	Gm4739
ENSMUSG00000084279	B	Gm13232
ENSMUSG00000081671	B	Gm13167
ENSMUSG00000022468	B	Endou
ENSMUSG00000035683	B	Melk
ENSMUSG00000022322	B	Shcbp1
ENSMUSG00000020185	B	E2f7
ENSMUSG00000041064	B	Pif1
ENSMUSG00000109157	B	Gm44829
ENSMUSG00000033031	B	Cip2a
ENSMUSG00000034329	B	Brip1
ENSMUSG00000045573	B	Penk
ENSMUSG00000117964	B	Gm36043
ENSMUSG00000026950	B	Neb
ENSMUSG00000024793	B	Tnfrsf25
ENSMUSG00000103105	B	Gm18752
ENSMUSG00000113349	B	Gm48369
ENSMUSG00000099569	B	Gm18301
ENSMUSG00000098043	B	Gm26980
ENSMUSG00000031202	B	Rab39b
ENSMUSG00000087700	B	Gm15283
ENSMUSG00000118078	B	Gm50228
ENSMUSG00000112639	B	A730063M14Rik
ENSMUSG00000116957	B	Gm34680
ENSMUSG00000046352	B	Gjb2
ENSMUSG00000022440	B	C1qtnf6
ENSMUSG00000040165	B	Cd209c
ENSMUSG00000014543	B	Klra17
ENSMUSG00000013921	B	Clip3
ENSMUSG00000091050	B	9330020H09Rik
ENSMUSG00000097075	B	Cdiptos
ENSMUSG00000048480	B	Cxcr1
ENSMUSG00000108353	B	Gm45205
ENSMUSG00000108760	B	Gm31897
ENSMUSG00000104117	B	Gm20743
ENSMUSG00000103030	B	E330011M16Rik
ENSMUSG00000053914	B	Kdm4d
ENSMUSG00000043079	B	Synpo
ENSMUSG00000051359	B	Ncald
ENSMUSG00000121478	B	NA
ENSMUSG00000048852	B	Gm12185
ENSMUSG00000082292	B	Gm12250
ENSMUSG00000112290	B	Gm33782
ENSMUSG00000060509	B	Xcr1
ENSMUSG00000035042	B	Ccl5
ENSMUSG00000018930	B	Ccl4
ENSMUSG00000041481	B	Serpina3g
ENSMUSG00000015437	B	Gzmb
ENSMUSG00000066363	B	Serpina3f
ENSMUSG00000023467	B	Tulp2
ENSMUSG00000034573	B	Ptpn13
ENSMUSG00000052684	B	Jun
ENSMUSG00000091993	B	B930036N10Rik
ENSMUSG00000020808	B	Pimreg
ENSMUSG00000067577	B	A430093F15Rik
ENSMUSG00000050445	B	Cyp8b1
ENSMUSG00000040026	B	Saa3
ENSMUSG00000029417	B	Cxcl9
ENSMUSG00000043931	B	Gimap7
ENSMUSG00000022586	B	Ly6i
ENSMUSG00000112627	B	4933412E12Rik
ENSMUSG00000027611	B	Procr
ENSMUSG00000120667	B	Gm56836
ENSMUSG00000044162	B	Tnip3
ENSMUSG00000027718	B	Il21
ENSMUSG00000050957	B	Insl6
ENSMUSG00000079138	B	Gm8818
ENSMUSG00000069273	B	H3c6
ENSMUSG00000027073	B	Prg2
ENSMUSG00000076695	B	Ighv1-18
ENSMUSG00000094689	B	Ighv1-81
ENSMUSG00000000817	B	Fasl
ENSMUSG00000028885	B	Smpdl3b
ENSMUSG00000092591	B	Gm20429
ENSMUSG00000095700	B	Ighv10-3
ENSMUSG00000029862	B	Clcn1
ENSMUSG00000120524	B	Gm57209
ENSMUSG00000011171	B	Vipr2
ENSMUSG00000085977	B	Gm5970
ENSMUSG00000079227	B	Ccr5
ENSMUSG00000037129	B	Tmprss13
ENSMUSG00000079018	B	Ly6c1
ENSMUSG00000028214	B	Gem
ENSMUSG00000095571	B	Ighv5-17
ENSMUSG00000028965	B	Tnfrsf9
ENSMUSG00000000791	B	Il12rb1
ENSMUSG00000103261	B	Gm36981
ENSMUSG00000028270	B	Gbp2
ENSMUSG00000105096	B	Gbp10
ENSMUSG00000078853	B	Igtp
ENSMUSG00000104713	B	Gbp6
ENSMUSG00000079362	B	Gm43302
ENSMUSG00000111913	B	Gm49751
ENSMUSG00000002190	B	Clgn
ENSMUSG00000037725	B	Ckap2
ENSMUSG00000050538	B	B230217C12Rik
ENSMUSG00000033295	B	Ptprf
ENSMUSG00000086152	B	Gm11454
ENSMUSG00000121125	B	Gm38883
ENSMUSG00000061482	B	H4c4
ENSMUSG00000120372	B	Gm57122
ENSMUSG00000085589	B	A430078I02Rik
ENSMUSG00000027939	B	Nup210l
ENSMUSG00000120516	B	Gm56972
ENSMUSG00000068606	B	Gm4841
ENSMUSG00000054046	B	Klk13
ENSMUSG00000065176	B	Rnu12
ENSMUSG00000106269	B	4930580E04Rik
ENSMUSG00000104765	B	Gm43058
ENSMUSG00000097569	B	Gm26640
ENSMUSG00000033967	B	Rnf225
ENSMUSG00000097266	B	Gm26802
ENSMUSG00000120726	B	Gm56619
ENSMUSG00000049539	B	H1f1
ENSMUSG00000063177	B	Klk1b27
ENSMUSG00000034177	B	Rnf43
ENSMUSG00000051504	B	Siglech
ENSMUSG00000015970	B	Chdh
ENSMUSG00000071113	B	Mboat4
ENSMUSG00000097115	B	1810019N24Rik
ENSMUSG00000120890	B	Gm56665
ENSMUSG00000102863	B	Gm37639
ENSMUSG00000096010	B	H4c16
ENSMUSG00000076755	B	Trgv1
ENSMUSG00000071658	B	Gng3
ENSMUSG00000042751	B	Nmnat2
ENSMUSG00000058728	B	Cd300c
ENSMUSG00000080076	B	H2ac14-ps
ENSMUSG00000034855	B	Cxcl10
ENSMUSG00000097662	B	Gm2093
ENSMUSG00000020826	B	Nos2
ENSMUSG00000083534	B	H2-M6-ps
ENSMUSG00000059042	B	Klk1b9
ENSMUSG00000103734	B	Gm37651
ENSMUSG00000037418	B	Best1
ENSMUSG00000020407	B	Upp1
ENSMUSG00000035186	B	Ubd
ENSMUSG00000101223	B	4930568A12Rik
ENSMUSG00000076550	B	Igkv4-63
ENSMUSG00000071552	B	Tigit
ENSMUSG00000055170	B	Ifng
ENSMUSG00000040204	B	Pclaf
ENSMUSG00000075602	B	Ly6a
ENSMUSG00000099241	B	Gvin-ps2
ENSMUSG00000098934	B	Gvin-ps4
ENSMUSG00000092021	B	Gbp11
ENSMUSG00000118051	B	Gm8714
ENSMUSG00000029822	B	Osbpl3
ENSMUSG00000029322	B	Plac8
ENSMUSG00000003545	B	Fosb
ENSMUSG00000021453	B	Gadd45g
ENSMUSG00000110570	B	Gm45778
ENSMUSG00000049093	B	Il23r
ENSMUSG00000059027	B	9630013D21Rik
ENSMUSG00000076757	B	Trgc4
ENSMUSG00000076749	B	Trgc1
ENSMUSG00000120697	B	Gm36496
ENSMUSG00000076754	B	Trgv2
ENSMUSG00000018341	B	Il12rb2
ENSMUSG00000094087	C	Ighv1-61
ENSMUSG00000076666	C	Ighv14-4
ENSMUSG00000096490	C	Igkv10-94
ENSMUSG00000094872	C	Igkv9-120
ENSMUSG00000076564	C	Igkv12-46
ENSMUSG00000094862	C	Ighv1-56
ENSMUSG00000036912	C	Piwil4
ENSMUSG00000037346	C	Hrh4
ENSMUSG00000094134	C	Ighv5-15
ENSMUSG00000095416	C	Ighv1-12
ENSMUSG00000104452	C	Ighv8-8
ENSMUSG00000030247	C	Kcnj8
ENSMUSG00000029075	C	Tnfrsf4
ENSMUSG00000093896	C	Ighv1-76
ENSMUSG00000095127	C	Ighv1-82
ENSMUSG00000076672	C	Ighv3-6
ENSMUSG00000030154	C	Klrb1f
ENSMUSG00000076525	C	Igkv1-99
ENSMUSG00000095197	C	Ighv1-59
ENSMUSG00000076677	C	Ighv6-3
ENSMUSG00000095761	C	Ighv1-20
ENSMUSG00000050241	C	Klre1
ENSMUSG00000030167	C	Klrc1
ENSMUSG00000030149	C	Klrk1
ENSMUSG00000094502	C	Ighv1-69
ENSMUSG00000094088	C	Ighv1-64
ENSMUSG00000095130	C	Ighv1-39
ENSMUSG00000040694	C	Apobec2
ENSMUSG00000039114	C	Nrn1
ENSMUSG00000073555	C	Gm4951
ENSMUSG00000094075	C	Ighv1-80
ENSMUSG00000095589	C	Ighv1-55
ENSMUSG00000094561	C	Ighv1-22
ENSMUSG00000094198	C	Ighv1-50
ENSMUSG00000096326	C	Ighv1-78
ENSMUSG00000001444	C	Tbx21
ENSMUSG00000110556	C	Gm45762
ENSMUSG00000043794	C	D830025C05Rik
ENSMUSG00000120222	C	Gm56512
ENSMUSG00000120892	C	Gm56995
ENSMUSG00000029121	C	Crmp1
ENSMUSG00000120054	C	Gm57214
ENSMUSG00000031397	C	Tktl1
ENSMUSG00000118361	C	Gm50237
ENSMUSG00000032238	C	Rora
ENSMUSG00000008153	C	Clstn3
ENSMUSG00000051747	C	Ttn
ENSMUSG00000058260	C	Serpina9
ENSMUSG00000052234	C	Epx
ENSMUSG00000096993	C	Gm26787
ENSMUSG00000058773	C	H1f5
ENSMUSG00000053702	C	Nebl
ENSMUSG00000049314	C	Fbxw13
ENSMUSG00000051378	C	Kif18b
ENSMUSG00000096461	C	Igkv14-130
ENSMUSG00000090942	C	F830016B08Rik
ENSMUSG00000042379	C	Esm1
ENSMUSG00000032507	C	Fbxl2
ENSMUSG00000120135	C	Gm57236
ENSMUSG00000031373	C	Car5b
ENSMUSG00000109086	C	Gm5596
ENSMUSG00000001555	C	Fkbp10
ENSMUSG00000007021	C	Syngr3
ENSMUSG00000026463	C	Atp2b4
ENSMUSG00000076523	C	Igkv15-103
ENSMUSG00000094335	C	Igkv1-117
ENSMUSG00000038146	C	Notch3
ENSMUSG00000103957	C	Gm10766
ENSMUSG00000120746	C	Gm56841
ENSMUSG00000034796	C	Cpne7
ENSMUSG00000042784	C	Muc1
ENSMUSG00000020473	C	Aebp1
ENSMUSG00000019851	C	Perp
ENSMUSG00000112547	C	Gm47096
ENSMUSG00000058385	C	H2bc8
ENSMUSG00000035365	C	Parpbp
ENSMUSG00000076540	C	Igkv4-80
ENSMUSG00000026475	C	Rgs16
ENSMUSG00000100210	C	H3c7
ENSMUSG00000104340	C	Gm10522
ENSMUSG00000045087	C	S1pr5
ENSMUSG00000094694	C	Ighv1-9
ENSMUSG00000022496	C	Tnfrsf17
ENSMUSG00000025140	C	Pycr1
ENSMUSG00000105462	C	Igkv4-77
ENSMUSG00000022385	C	Gtse1
ENSMUSG00000076671	C	Ighv13-2
ENSMUSG00000095612	C	Ighv5-4
ENSMUSG00000096150	C	Ighv1-85
ENSMUSG00000095429	C	Ighv5-12
ENSMUSG00000108436	C	Gm44851
ENSMUSG00000076541	C	Igkv4-79
ENSMUSG00000121040	C	Gm57305
ENSMUSG00000093894	C	Ighv1-53
ENSMUSG00000042262	C	Ccr8
ENSMUSG00000094728	C	NA
ENSMUSG00000095450	C	NA
ENSMUSG00000037474	C	Dtl
ENSMUSG00000108090	C	Gm6637
ENSMUSG00000034023	C	Fancd2
ENSMUSG00000076680	C	Ighv6-6
ENSMUSG00000096422	C	Igkv12-44
ENSMUSG00000076609	C	Igkc
ENSMUSG00000067149	C	Jchain
ENSMUSG00000069270	C	H2ac6
ENSMUSG00000094433	C	Igkv5-43
ENSMUSG00000076552	C	Igkv4-61
ENSMUSG00000094094	C	Igkv5-45
ENSMUSG00000033952	C	Aspm
ENSMUSG00000076577	C	Igkv8-30
ENSMUSG00000076526	C	Igkv12-98
ENSMUSG00000037419	C	Endod1
ENSMUSG00000020592	C	Sdc1
ENSMUSG00000098814	C	Igkv19-93
ENSMUSG00000095583	C	Ighv14-2
ENSMUSG00000079543	C	Igkv13-85
ENSMUSG00000076508	C	Igkv17-127
ENSMUSG00000076576	C	Igkv6-32
ENSMUSG00000095771	C	Igkv14-111
ENSMUSG00000076538	C	Igkv13-84
ENSMUSG00000095630	C	Igkv6-23
ENSMUSG00000094787	C	Ighv1-54
ENSMUSG00000052336	C	Cx3cr1
ENSMUSG00000028832	C	Stmn1
ENSMUSG00000068101	C	Cenpm
ENSMUSG00000076532	C	Igkv4-91
ENSMUSG00000076549	C	Igkv4-68
ENSMUSG00000094491	C	Igkv1-133
ENSMUSG00000094124	C	Ighv1-74
ENSMUSG00000094006	C	Igkv4-59
ENSMUSG00000076555	C	Igkv4-57-1
ENSMUSG00000000982	C	Ccl3
ENSMUSG00000076752	C	Trgc2
ENSMUSG00000076545	C	Igkv4-72
ENSMUSG00000091705	C	H2-Q2
ENSMUSG00000030114	C	Klrg1
ENSMUSG00000071176	C	Arhgef10
ENSMUSG00000023132	C	Gzma
ENSMUSG00000028175	C	Depdc1a
ENSMUSG00000096715	C	Igkv3-4
ENSMUSG00000076615	C	Ighg3
ENSMUSG00000026683	C	Nuf2
ENSMUSG00000028718	C	Stil
ENSMUSG00000018451	C	6330403K07Rik
ENSMUSG00000036223	C	Ska1
ENSMUSG00000009092	C	Derl3
ENSMUSG00000094356	C	Igkv8-28
ENSMUSG00000041431	C	Ccnb1
ENSMUSG00000039521	C	Foxp3
ENSMUSG00000032218	C	Ccnb2
ENSMUSG00000030867	C	Plk1
ENSMUSG00000015880	C	Ncapg
ENSMUSG00000027469	C	Tpx2
ENSMUSG00000017716	C	Birc5
ENSMUSG00000019942	C	Cdk1
ENSMUSG00000001403	C	Ube2c
ENSMUSG00000094797	C	Igkv6-15
ENSMUSG00000079553	C	Kifc1
ENSMUSG00000025747	C	Tyms
ENSMUSG00000096632	C	Igkv9-124
ENSMUSG00000095519	C	Ighv1-66
ENSMUSG00000005233	C	Spc25
ENSMUSG00000026605	C	Cenpf
ENSMUSG00000076745	C	Trgv4
ENSMUSG00000076608	C	Igkj5
ENSMUSG00000031004	C	Mki67
ENSMUSG00000038943	C	Prc1
ENSMUSG00000012443	C	Kif11
ENSMUSG00000020649	C	Rrm2
ENSMUSG00000024353	C	Mzb1
ENSMUSG00000020330	C	Hmmr
ENSMUSG00000076800	C	Trav6n-5
ENSMUSG00000005640	C	Insrr
ENSMUSG00000095351	C	Igkv3-2
ENSMUSG00000037161	C	Mgarp
ENSMUSG00000031530	C	Dusp4
ENSMUSG00000034958	C	Atcay
ENSMUSG00000076518	C	Igkv2-112
ENSMUSG00000095794	C	Igkv6-17
ENSMUSG00000106668	C	Iglj1
ENSMUSG00000095981	C	Ighv10-1
ENSMUSG00000094940	C	Ighv1-84
ENSMUSG00000076674	C	Ighv3-8
ENSMUSG00000095442	C	Ighv1-4
ENSMUSG00000095682	C	Igkv3-1
ENSMUSG00000052125	C	F730043M19Rik
ENSMUSG00000117442	C	1810073O08Rik
ENSMUSG00000076604	C	Igkj1
ENSMUSG00000019558	C	Slc6a8
ENSMUSG00000038156	C	Spon1
ENSMUSG00000076547	C	Igkv4-70
ENSMUSG00000010830	C	Kdelr3
ENSMUSG00000076617	C	Ighm
ENSMUSG00000095204	C	Ighv1-52
ENSMUSG00000027715	C	Ccna2
ENSMUSG00000096410	C	Ighv1-19
ENSMUSG00000094117	C	Igkv3-12
ENSMUSG00000076613	C	Ighg2b
ENSMUSG00000104769	C	Igkv8-34
ENSMUSG00000076543	C	Igkv4-74
ENSMUSG00000095338	C	Igkv3-9
ENSMUSG00000096459	C	Ighv9-3
ENSMUSG00000076612	C	Ighg2c
ENSMUSG00000096672	C	Ighv1-63
ENSMUSG00000076731	C	Ighv8-12
ENSMUSG00000102364	C	Ighv8-5
ENSMUSG00000076536	C	Igkv4-86
ENSMUSG00000035246	C	Pcyt1b
ENSMUSG00000096515	C	Igkv14-100
ENSMUSG00000046959	C	Slc26a1
ENSMUSG00000003355	C	Fkbp11
ENSMUSG00000076514	C	Igkv17-121
ENSMUSG00000072980	C	Oip5
ENSMUSG00000071192	C	Wfikkn1
ENSMUSG00000095737	C	Igkv11-125
ENSMUSG00000046341	C	Gm11223
ENSMUSG00000096805	C	Ighv9-1
ENSMUSG00000039748	C	Exo1
ENSMUSG00000094102	C	Ighv9-2
ENSMUSG00000076594	C	Igkv6-13
ENSMUSG00000021965	C	Ska3
ENSMUSG00000026039	C	Sgo2a
ENSMUSG00000095335	C	Igkv3-5
ENSMUSG00000095200	C	Ighv1-7
ENSMUSG00000076596	C	Igkv3-10
ENSMUSG00000095642	C	Ighv14-3
ENSMUSG00000076605	C	Igkj2
ENSMUSG00000095753	C	Igkv4-53
ENSMUSG00000096594	C	Igkv8-19
ENSMUSG00000076580	C	Igkv8-27
ENSMUSG00000095210	C	Ighv5-9-1
ENSMUSG00000076583	C	Igkv8-24
ENSMUSG00000094930	C	Igkv6-25
ENSMUSG00000076522	C	Igkv16-104
ENSMUSG00000076556	C	Igkv4-57
ENSMUSG00000093861	C	Igkv1-110
ENSMUSG00000095633	C	Igkv4-58
ENSMUSG00000096844	C	Igkv6-14
ENSMUSG00000076652	C	Ighv7-3
ENSMUSG00000094420	C	Igkv10-96
ENSMUSG00000076934	C	Iglv1
ENSMUSG00000105906	C	Iglc1
ENSMUSG00000096336	C	Igkv1-135
ENSMUSG00000096464	C	Ighv2-2
ENSMUSG00000026955	C	Sapcd2
ENSMUSG00000076535	C	Igkv1-88
ENSMUSG00000022838	C	Eaf2
ENSMUSG00000075702	C	Selenom
ENSMUSG00000025321	C	Itgb8
ENSMUSG00000050982	C	Apol10a
ENSMUSG00000020728	C	Cep112
ENSMUSG00000105646	C	Gm30211
ENSMUSG00000076598	C	Igkv3-7
ENSMUSG00000076633	C	Ighv5-2
ENSMUSG00000116383	C	Apol10c-ps
ENSMUSG00000061878	C	Sphk1
ENSMUSG00000076937	C	Iglc2
ENSMUSG00000076940	C	Iglv2
ENSMUSG00000105547	C	Iglc3
ENSMUSG00000027075	C	Slc43a1
ENSMUSG00000120049	C	Gm57109
ENSMUSG00000076533	C	Igkv4-90
ENSMUSG00000026478	C	Lamc1
ENSMUSG00000026770	C	Il2ra
ENSMUSG00000041842	C	Fhdc1
ENSMUSG00000032908	C	Sgpp2
ENSMUSG00000117575	C	Gm36486
ENSMUSG00000032192	C	Gnb5
ENSMUSG00000095195	C	Gm3005
ENSMUSG00000032578	C	Cish
ENSMUSG00000084020	C	Wsb2-ps
ENSMUSG00000096498	C	Ighv2-5
ENSMUSG00000105606	C	Igkv2-109
ENSMUSG00000096670	C	Ighv2-6
ENSMUSG00000047678	C	Gpr82
ENSMUSG00000094262	C	Igkv4-62
ENSMUSG00000005124	C	Ccn4
ENSMUSG00000029875	C	Ccdc184
ENSMUSG00000055022	C	Cntn1
ENSMUSG00000021136	C	Smoc1
ENSMUSG00000120752	C	Gm57289
ENSMUSG00000084862	C	Gm16278
ENSMUSG00000076562	C	Igkv4-50
ENSMUSG00000085133	C	B930095G15Rik
ENSMUSG00000030981	C	Mmp21
ENSMUSG00000104546	D	Gm43858
ENSMUSG00000037982	D	Gm9725
ENSMUSG00000104020	D	Gm37215
ENSMUSG00000102776	D	Gm38162
ENSMUSG00000109799	D	Gm45515
ENSMUSG00000062470	D	Fbxl12os
ENSMUSG00000002012	D	Pnck
ENSMUSG00000074215	D	Gm10643
ENSMUSG00000014846	D	Tppp3
ENSMUSG00000096638	D	Ighv2-9
ENSMUSG00000061086	D	Myl4
ENSMUSG00000095285	D	Ighv5-9
ENSMUSG00000048442	D	Smim5
ENSMUSG00000114213	D	A430090L17Rik
ENSMUSG00000094509	D	Ighv14-1
ENSMUSG00000031877	E	Ces2g
ENSMUSG00000073063	E	Hbq1b
ENSMUSG00000045629	E	Sh3tc2
ENSMUSG00000023926	E	Rhag
ENSMUSG00000031170	E	Slc38a5
ENSMUSG00000109314	E	Gm44699
ENSMUSG00000031132	E	Cd40lg
ENSMUSG00000025175	E	Fn3k
ENSMUSG00000026490	E	Cdc42bpa
ENSMUSG00000037124	E	Trim58
ENSMUSG00000083104	E	Gm12917
ENSMUSG00000021792	E	Prxl2a
ENSMUSG00000082101	E	Slfn14
ENSMUSG00000038871	E	Bpgm
ENSMUSG00000025270	E	Alas2
ENSMUSG00000026532	E	Spta1
ENSMUSG00000022100	E	Xpo7
ENSMUSG00000032411	E	Tfdp2
ENSMUSG00000020802	E	Ube2o
ENSMUSG00000028716	E	Pdzk1ip1
ENSMUSG00000073400	E	Trim10
ENSMUSG00000027562	E	Car2
ENSMUSG00000004655	E	Aqp1
ENSMUSG00000028332	E	Hemgn
ENSMUSG00000028825	E	Rhd
ENSMUSG00000042066	E	Tmcc2
ENSMUSG00000022099	E	Dmtn
ENSMUSG00000051839	E	Gypa
ENSMUSG00000023216	E	Epb42
ENSMUSG00000006574	E	Slc4a1
ENSMUSG00000087049	E	Bach2it1
ENSMUSG00000112621	E	Gm5173
ENSMUSG00000112311	E	Gm8153
ENSMUSG00000049115	E	Agtr1a
ENSMUSG00000037872	E	Ackr1
ENSMUSG00000034059	E	Ypel4
ENSMUSG00000021118	E	Plek2
ENSMUSG00000029866	E	Kel
ENSMUSG00000051910	E	Sox6
ENSMUSG00000022197	E	Pdzd2
ENSMUSG00000038725	E	Pkhd1l1
ENSMUSG00000017314	E	Mpp2
ENSMUSG00000034127	E	Tspan8
ENSMUSG00000053279	E	Aldh1a1
ENSMUSG00000021061	E	Sptb
ENSMUSG00000028644	E	Ermap
ENSMUSG00000054191	E	Klf1
ENSMUSG00000020641	E	Rsad2
ENSMUSG00000005540	E	Fcer2a
ENSMUSG00000024588	E	Fech
ENSMUSG00000034449	E	Dhrs11
ENSMUSG00000020490	E	Btnl10
ENSMUSG00000028328	E	Tmod1
ENSMUSG00000034248	E	Slc25a37
ENSMUSG00000042331	E	Specc1
ENSMUSG00000025584	E	Pde8a
ENSMUSG00000029752	E	Asns
ENSMUSG00000004552	E	Ctse
ENSMUSG00000040289	E	Hey1
ENSMUSG00000026399	E	Cd55
ENSMUSG00000026311	E	Asb1
ENSMUSG00000050550	E	Gm11868
ENSMUSG00000084860	E	2610204G07Rik
ENSMUSG00000111301	E	Gm30671
ENSMUSG00000105263	E	Gm42427
ENSMUSG00000072476	E	Gm9008
ENSMUSG00000103953	E	Gm29718
ENSMUSG00000100801	E	Gm15459
ENSMUSG00000099624	E	Gm7889
ENSMUSG00000037432	E	Fer1l5
ENSMUSG00000059040	E	Eno1b
ENSMUSG00000064193	E	Gm4735
ENSMUSG00000103672	E	Gm37621
ENSMUSG00000009588	E	St6galnac1
ENSMUSG00000078586	E	Gm11735
ENSMUSG00000090363	E	Gm3512
ENSMUSG00000020866	E	Cacna1g
ENSMUSG00000032656	E	Marchf3
ENSMUSG00000039253	E	Fn3krp
ENSMUSG00000111547	E	Gm48069
ENSMUSG00000035773	F	Kiss1r
ENSMUSG00000053004	F	Hrh1
ENSMUSG00000016024	F	Lbp
ENSMUSG00000059824	F	Dbp
ENSMUSG00000039831	F	Arhgap29
ENSMUSG00000053528	F	A530021J07Rik
ENSMUSG00000097445	F	Gm26631
ENSMUSG00000021684	F	Pde8b
ENSMUSG00000021375	F	Kif13a
ENSMUSG00000039116	F	Adgrg6
ENSMUSG00000121011	F	Gm56975
ENSMUSG00000062312	F	Erbb2
ENSMUSG00000022371	F	Col14a1
ENSMUSG00000041797	F	Abca9
ENSMUSG00000031824	F	6430548M08Rik
ENSMUSG00000039115	F	Itga9
ENSMUSG00000032827	F	Ppp1r9a
ENSMUSG00000048264	F	Dip2c
ENSMUSG00000048078	F	Tenm4
ENSMUSG00000098889	F	Gm27206
ENSMUSG00000074417	F	Pira12
ENSMUSG00000000686	F	Abhd15
ENSMUSG00000025855	F	Prkar1b
ENSMUSG00000031451	F	Gas6
ENSMUSG00000055013	F	Agap1
ENSMUSG00000027253	F	Lrp4
ENSMUSG00000089809	F	Rasgef1b
ENSMUSG00000019966	F	Kitl
ENSMUSG00000025154	F	Arhgap19
ENSMUSG00000036641	F	Ccdc148
ENSMUSG00000068747	F	Sort1
ENSMUSG00000110558	F	Gm45779
ENSMUSG00000035954	F	Dock4
ENSMUSG00000035158	F	Mitf
ENSMUSG00000033705	F	Stard9
ENSMUSG00000031216	F	Stard8
ENSMUSG00000044676	F	Zfp612
ENSMUSG00000028864	F	Hgf
ENSMUSG00000022074	F	Tnfrsf10b
ENSMUSG00000051439	F	Cd14
ENSMUSG00000039545	F	Flicr
ENSMUSG00000022788	F	Fgd4
ENSMUSG00000113003	F	Gm47138
ENSMUSG00000030427	F	Lilra6
ENSMUSG00000031555	F	Adam9
ENSMUSG00000004609	F	Cd33
ENSMUSG00000097378	F	B230208H11Rik
ENSMUSG00000001946	F	Esam
ENSMUSG00000041268	F	Dmxl2
ENSMUSG00000005803	F	Sqor
ENSMUSG00000055782	F	Abcd2
ENSMUSG00000025911	F	Adhfe1
ENSMUSG00000032890	F	Rims3
ENSMUSG00000039691	F	Tspan10
ENSMUSG00000027695	F	Pld1
ENSMUSG00000020774	F	Aspa
ENSMUSG00000020604	F	Arsg
ENSMUSG00000066755	F	Tnfsf18
ENSMUSG00000022607	F	Ptk2
ENSMUSG00000026994	F	Galnt3
ENSMUSG00000040522	F	Tlr8
ENSMUSG00000019055	F	Plod1
ENSMUSG00000027656	F	Ccn5
ENSMUSG00000000440	F	Pparg
ENSMUSG00000050103	F	Agmo
ENSMUSG00000015947	F	Fcgr1
ENSMUSG00000032348	F	Gsta4
ENSMUSG00000015854	F	Cd5l
ENSMUSG00000010307	F	Tmem86a
ENSMUSG00000025511	F	Tspan4
ENSMUSG00000040722	F	Scamp5
ENSMUSG00000031613	F	Hpgd
ENSMUSG00000047250	F	Ptgs1
ENSMUSG00000036362	F	P2ry13
ENSMUSG00000002103	F	Acp2
ENSMUSG00000004359	F	Spic
ENSMUSG00000021190	F	Lgmn
ENSMUSG00000038578	F	Susd1
ENSMUSG00000022218	F	Tgm1
ENSMUSG00000002108	F	Nr1h3
ENSMUSG00000020053	F	Igf1
ENSMUSG00000028517	F	Plpp3
ENSMUSG00000026938	F	Fcna
ENSMUSG00000046321	F	Hs3st2
ENSMUSG00000060147	F	Serpinb6a
ENSMUSG00000081534	F	Slc48a1
ENSMUSG00000060703	F	Cd302
ENSMUSG00000001128	F	Cfp
ENSMUSG00000051682	F	Treml4
ENSMUSG00000081665	F	Pira1
ENSMUSG00000000149	F	Gna12
ENSMUSG00000022235	F	Cmbl
ENSMUSG00000000958	F	Slc7a7
ENSMUSG00000023019	F	Gpd1
ENSMUSG00000040616	F	Tmem51
ENSMUSG00000036887	F	C1qa
ENSMUSG00000036905	F	C1qb
ENSMUSG00000074472	F	Zfp872
ENSMUSG00000046470	F	Sox18
ENSMUSG00000034853	F	Acot11
ENSMUSG00000015846	F	Rxra
ENSMUSG00000065987	F	Cd209b
ENSMUSG00000034947	F	Tmem106a
ENSMUSG00000026177	F	Slc11a1
ENSMUSG00000015305	F	Sash1
ENSMUSG00000040146	F	Rgl3
ENSMUSG00000022817	F	Itgb5
ENSMUSG00000033278	F	Ptprm
ENSMUSG00000013611	F	Snx31
ENSMUSG00000090185	F	Gm15523
ENSMUSG00000060512	F	0610040J01Rik
ENSMUSG00000020865	F	Abcc3
ENSMUSG00000051497	F	Kcnj16
ENSMUSG00000032554	F	Trf
ENSMUSG00000031903	F	Pla2g15
ENSMUSG00000022103	F	Gfra2
ENSMUSG00000064373	F	Selenop
ENSMUSG00000025150	F	Cbr2
ENSMUSG00000028019	F	Pdgfc
ENSMUSG00000030474	F	Siglece
ENSMUSG00000005360	F	Slc1a3
ENSMUSG00000035448	F	Ccr3
ENSMUSG00000022181	F	C6
ENSMUSG00000037605	F	Adgrl3
ENSMUSG00000121059	F	Gm57137
ENSMUSG00000037762	F	Slc16a9
ENSMUSG00000030084	F	Plxna1
ENSMUSG00000112714	F	Gm4798
ENSMUSG00000095385	F	D630033O11Rik
ENSMUSG00000025375	F	Aatk
ENSMUSG00000020010	F	Vnn3
ENSMUSG00000026482	F	Rgl1
ENSMUSG00000034714	F	Ttyh2
ENSMUSG00000037902	F	Sirpa
ENSMUSG00000048498	F	Cd300e
ENSMUSG00000032122	F	Slc37a2
ENSMUSG00000045551	F	Fpr1
ENSMUSG00000022272	F	Myo10
ENSMUSG00000030737	F	Slco2b1
ENSMUSG00000025993	F	Slc40a1
ENSMUSG00000026435	F	Slc45a3
ENSMUSG00000026473	F	Glul
ENSMUSG00000041707	F	Tmem273
ENSMUSG00000052942	F	Glis3
ENSMUSG00000109245	F	Gm44860
ENSMUSG00000041633	F	Kctd12b
ENSMUSG00000028736	F	Pax7
ENSMUSG00000020023	F	Tmcc3
ENSMUSG00000023473	F	Celsr3
ENSMUSG00000015843	F	Rxrg
ENSMUSG00000114995	F	Gm49284
ENSMUSG00000099696	F	2900052N01Rik
ENSMUSG00000061353	F	Cxcl12
ENSMUSG00000054589	F	Gm9949
ENSMUSG00000022892	F	App
ENSMUSG00000029484	F	Anxa3
ENSMUSG00000043300	F	B3galnt1
ENSMUSG00000032066	F	Bco2
ENSMUSG00000030954	F	Gp2
ENSMUSG00000020810	F	Cygb
ENSMUSG00000057286	F	St6galnac2
ENSMUSG00000029361	F	Nos1
ENSMUSG00000026442	F	Nfasc
ENSMUSG00000049119	F	Fam110b
ENSMUSG00000052392	F	Acot4
ENSMUSG00000030170	F	Wnt5b
ENSMUSG00000082870	F	Gm12165
ENSMUSG00000034783	F	Cd207
ENSMUSG00000018459	F	Slc13a3
ENSMUSG00000034039	F	Prss29
ENSMUSG00000039956	F	Mrap
ENSMUSG00000076218	F	Mir692-1
ENSMUSG00000081251	F	Gm12164
ENSMUSG00000058542	F	Gm15590
ENSMUSG00000053646	F	Plxnb1
ENSMUSG00000073412	F	Lst1
ENSMUSG00000074281	F	Gm12522
ENSMUSG00000015202	F	Cnksr3
ENSMUSG00000031765	F	Mt1
ENSMUSG00000026390	F	Marco
ENSMUSG00000020599	F	Rgs9
ENSMUSG00000097207	F	6030443J06Rik
ENSMUSG00000008845	F	Cd163
ENSMUSG00000032564	F	Cpne4
ENSMUSG00000097944	F	A130014A01Rik
ENSMUSG00000060224	F	Pyroxd2
ENSMUSG00000031119	F	Gpc4
ENSMUSG00000039246	F	Lyplal1
ENSMUSG00000097296	F	Gm26532
ENSMUSG00000027488	F	Snta1
ENSMUSG00000029135	G	Fosl2
ENSMUSG00000102975	G	Gm37347
ENSMUSG00000086564	G	Cd101
ENSMUSG00000067235	G	H2-Q10
ENSMUSG00000064246	G	Chil1
ENSMUSG00000025491	G	Ifitm1
ENSMUSG00000037095	G	Lrg1
ENSMUSG00000017737	G	Mmp9
ENSMUSG00000031722	G	Hp
ENSMUSG00000041754	G	Trem3
ENSMUSG00000042265	G	Trem1
ENSMUSG00000030142	G	Clec4e
ENSMUSG00000027360	G	Hdc
ENSMUSG00000026073	G	Il1r2
ENSMUSG00000026981	G	Il1rn
ENSMUSG00000078817	G	Nlrp12
ENSMUSG00000108291	G	Gm44292
ENSMUSG00000115946	G	Mirt2
ENSMUSG00000052749	G	Trim30b
ENSMUSG00000051490	G	Foxd4
ENSMUSG00000025330	G	Padi4
ENSMUSG00000013974	G	Mcemp1
ENSMUSG00000027398	G	Il1b
ENSMUSG00000049130	G	C5ar1
ENSMUSG00000021125	G	Arg2
ENSMUSG00000025161	G	Slc16a3
ENSMUSG00000028859	G	Csf3r
ENSMUSG00000025701	G	Alox5
ENSMUSG00000030144	G	Clec4d
ENSMUSG00000026180	G	Cxcr2
ENSMUSG00000018927	G	Ccl6
ENSMUSG00000024053	G	Emilin2
ENSMUSG00000001156	G	Mxd1
ENSMUSG00000069792	G	Wfdc17
ENSMUSG00000042807	G	Hecw2
ENSMUSG00000060591	G	Ifitm2
ENSMUSG00000056529	G	Ptafr
ENSMUSG00000075705	G	Msrb1
ENSMUSG00000043939	G	A530064D06Rik
ENSMUSG00000021360	G	Gcnt2
ENSMUSG00000024011	G	Pi16
ENSMUSG00000036067	G	Slc2a6
ENSMUSG00000029915	G	Clec5a
ENSMUSG00000042417	G	Ccno
ENSMUSG00000079293	G	Clec7a
ENSMUSG00000030340	G	Scnn1a
ENSMUSG00000071637	G	Cebpd
ENSMUSG00000022237	G	Ankrd33b
ENSMUSG00000047945	G	Marcksl1
ENSMUSG00000117485	G	Gm19696
ENSMUSG00000054855	G	Rnd1
ENSMUSG00000008540	G	Mgst1
ENSMUSG00000074063	G	Osgin1
ENSMUSG00000023913	G	Pla2g7
ENSMUSG00000058099	G	Nfam1
ENSMUSG00000030579	G	Tyrobp
ENSMUSG00000069516	G	Lyz2
ENSMUSG00000025648	G	Pfkfb4
ENSMUSG00000021069	G	Pygl
ENSMUSG00000095028	G	Sirpb1b
ENSMUSG00000074677	G	Sirpb1c
ENSMUSG00000078122	G	F630028O10Rik
ENSMUSG00000017002	G	Slpi
ENSMUSG00000022534	G	Mefv
ENSMUSG00000035863	G	Palm
ENSMUSG00000034641	G	Cd300ld
ENSMUSG00000101585	G	1600010M07Rik
ENSMUSG00000031012	G	Cask
ENSMUSG00000021281	G	Tnfaip2
ENSMUSG00000093973	G	Mrgpra2a
ENSMUSG00000096719	G	Mrgpra2b
ENSMUSG00000045636	G	Mtus1
ENSMUSG00000063234	G	Gpr84
ENSMUSG00000024451	G	Arap3
ENSMUSG00000033508	G	Asprv1
ENSMUSG00000040907	G	Atp1a3
ENSMUSG00000026220	G	Slc16a14
ENSMUSG00000101517	G	4732465J04Rik
ENSMUSG00000090192	G	Gm16556
ENSMUSG00000027737	G	Slc7a11
ENSMUSG00000050931	G	Sgms2
ENSMUSG00000047798	G	Cd300lf
ENSMUSG00000025804	G	Ccr1
ENSMUSG00000051397	G	Tacstd2
ENSMUSG00000030747	G	Dgat2
ENSMUSG00000033720	G	Sfxn5
ENSMUSG00000063193	G	Cd300lb
ENSMUSG00000037185	G	Krt80
ENSMUSG00000106103	G	Gm43081
ENSMUSG00000025064	G	Col17a1
ENSMUSG00000120038	G	Gm36462
ENSMUSG00000078867	G	Gm14418
ENSMUSG00000074634	G	Tmem267
ENSMUSG00000115340	G	Gm48965
ENSMUSG00000120284	H	Gm56714
ENSMUSG00000063696	H	Gm8730
ENSMUSG00000081434	H	Gm14165
ENSMUSG00000120303	H	4930500G05Rik
ENSMUSG00000102881	H	Gm3807
ENSMUSG00000054135	H	A430110L20Rik
ENSMUSG00000053199	H	Arhgap20
ENSMUSG00000082399	H	Gm14036
ENSMUSG00000083833	H	Gm13841
ENSMUSG00000094497	H	Gm8210
ENSMUSG00000033808	H	Tmem87a
ENSMUSG00000090222	H	Ifi203-ps
ENSMUSG00000038026	H	Kcnj9
ENSMUSG00000072949	H	Acot1
ENSMUSG00000027200	H	Sema6d
ENSMUSG00000015354	H	Pcolce2
ENSMUSG00000030409	H	Dmpk
ENSMUSG00000030147	H	Clec4b1
ENSMUSG00000014778	H	Fhod1
ENSMUSG00000036622	H	Atp13a2
ENSMUSG00000020102	H	Slc16a7
ENSMUSG00000036295	H	Lrrn3
ENSMUSG00000104369	H	Gm38082
ENSMUSG00000031523	H	Dlc1
ENSMUSG00000055546	H	Timd4
ENSMUSG00000020072	H	Pbld2
ENSMUSG00000108861	H	5930435M05Rik
ENSMUSG00000041378	H	Cldn5
ENSMUSG00000054675	H	Tmem119
ENSMUSG00000024371	H	C2
ENSMUSG00000085881	H	Gm15912
ENSMUSG00000098207	H	Arl14
ENSMUSG00000018593	H	Sparc
ENSMUSG00000044708	H	Kcnj10
ENSMUSG00000050666	H	Vstm4
ENSMUSG00000038034	H	Igsf8
ENSMUSG00000024730	H	Ms4a8a
ENSMUSG00000038388	H	Pals2
ENSMUSG00000043940	H	Wdfy3
ENSMUSG00000064225	H	Paqr9
ENSMUSG00000070369	H	Itgad
ENSMUSG00000002602	H	Axl
ENSMUSG00000004730	H	Adgre1
ENSMUSG00000060044	H	Tmem26
ENSMUSG00000024621	H	Csf1r
ENSMUSG00000027962	H	Vcam1
ENSMUSG00000040249	H	Lrp1
ENSMUSG00000014361	H	Mertk
ENSMUSG00000032915	H	Adgre4
ENSMUSG00000026712	H	Mrc1
ENSMUSG00000026141	H	Col19a1
ENSMUSG00000030310	H	Slc6a1
ENSMUSG00000055435	H	Maf
ENSMUSG00000097585	H	E230029C05Rik
ENSMUSG00000036353	H	P2ry12
ENSMUSG00000024597	H	Slc12a2
ENSMUSG00000037031	H	Tspan15
ENSMUSG00000006930	H	Hap1
ENSMUSG00000030064	H	Frmd4b
ENSMUSG00000022180	H	Slc7a8
ENSMUSG00000035459	H	Stab2
ENSMUSG00000021806	H	Nid2
ENSMUSG00000061666	H	Gdpd1
ENSMUSG00000039005	H	Tlr4
ENSMUSG00000033788	H	Dysf
ENSMUSG00000036606	H	Plxnb2
ENSMUSG00000043832	H	Clec4a3
ENSMUSG00000064039	H	Ccr1l1
ENSMUSG00000115222	H	Gm49747
ENSMUSG00000019464	H	Ptger1
ENSMUSG00000023079	H	Gtf2ird1
ENSMUSG00000006611	H	Hfe
ENSMUSG00000024044	H	Epb41l3
ENSMUSG00000025743	H	Sdc3
ENSMUSG00000002985	H	Apoe
ENSMUSG00000025151	H	Maged1
ENSMUSG00000037706	H	Cd81
ENSMUSG00000024663	H	Rab3il1
ENSMUSG00000040713	H	Creg1
ENSMUSG00000006356	H	Crip2
ENSMUSG00000036585	H	Fgf1
ENSMUSG00000022057	H	Adamdec1
ENSMUSG00000089942	H	Pira2
ENSMUSG00000001552	H	Jup
ENSMUSG00000029919	H	Hpgds
ENSMUSG00000032261	H	Sh3bgrl2
ENSMUSG00000051586	H	Mical3
ENSMUSG00000015568	H	Lpl
ENSMUSG00000038665	H	Dgki
ENSMUSG00000022957	H	Itsn1
ENSMUSG00000032375	H	Aph1b
ENSMUSG00000026131	H	Dst
ENSMUSG00000071856	H	Mcc
ENSMUSG00000063611	H	Gm10134
ENSMUSG00000000127	H	Fer
ENSMUSG00000083282	H	Ctsf
ENSMUSG00000083907	H	Plk-ps1
ENSMUSG00000022261	H	Sdc2
ENSMUSG00000035936	H	Aldh5a1
ENSMUSG00000033209	H	Ttc28
ENSMUSG00000042035	H	Igsf3
ENSMUSG00000027978	H	Prss12
ENSMUSG00000032609	H	Klhdc8b
ENSMUSG00000044033	I	Ccdc141
ENSMUSG00000023017	I	Asic1
ENSMUSG00000052512	I	Nav2
ENSMUSG00000108322	I	5430431A17Rik
ENSMUSG00000115681	I	Gm2682
ENSMUSG00000118064	I	Gm50210
ENSMUSG00000038085	I	Cnbd2
ENSMUSG00000026730	I	Pter
ENSMUSG00000110386	I	Gm42031
ENSMUSG00000103998	I	Gm38025
ENSMUSG00000001911	I	Nfix
ENSMUSG00000028573	I	Fggy
ENSMUSG00000033578	I	Tmem35a
ENSMUSG00000055926	I	Gm14137
ENSMUSG00000025318	I	Jph3
ENSMUSG00000030854	I	Ptpn5
ENSMUSG00000025787	I	Tgm4
ENSMUSG00000084775	I	Gm16741
ENSMUSG00000039745	I	Htatip2
ENSMUSG00000001249	I	Hpn
ENSMUSG00000030782	I	Tgfb1i1
ENSMUSG00000027993	I	Trim2
ENSMUSG00000018398	I	Septin8
ENSMUSG00000045954	I	Cavin2
ENSMUSG00000030054	I	Gp9
ENSMUSG00000031974	I	Abcb10
ENSMUSG00000090958	I	Lrrc32
ENSMUSG00000118669	I	Arvcf
ENSMUSG00000042208	I	Sanbr
ENSMUSG00000047181	I	Samd14
ENSMUSG00000045639	I	Zfp629
ENSMUSG00000053886	I	Sh2d4a
ENSMUSG00000052544	I	St6galnac3
ENSMUSG00000037443	I	Cep85
ENSMUSG00000045973	I	Slc25a51
ENSMUSG00000117465	I	Gm49980
ENSMUSG00000031139	I	Mcf2
ENSMUSG00000106981	I	Gm45495
ENSMUSG00000027765	I	P2ry1
ENSMUSG00000047648	I	Fbxo30
ENSMUSG00000100594	I	2810414N06Rik
ENSMUSG00000108456	I	4732496C06Rik
ENSMUSG00000042476	I	Abcb4
ENSMUSG00000103967	I	Gm38214
ENSMUSG00000025702	I	Marchf8
ENSMUSG00000006235	I	Epor
ENSMUSG00000019838	I	Slc16a10
ENSMUSG00000030878	I	Cdr2
ENSMUSG00000059423	I	Zfp933
ENSMUSG00000052302	I	Tbc1d30
ENSMUSG00000085826	I	Gm15638
ENSMUSG00000076430	I	Hus1b
ENSMUSG00000096188	I	Cmtm4
ENSMUSG00000074207	I	Adh1
ENSMUSG00000007379	I	Dennd2c
ENSMUSG00000020773	I	Trim47
ENSMUSG00000021476	I	Habp4
ENSMUSG00000026421	I	Csrp1
ENSMUSG00000018417	J	Myo1b
ENSMUSG00000001768	J	Rin2
ENSMUSG00000038740	J	Mvb12b
ENSMUSG00000031596	J	Slc7a2
ENSMUSG00000020892	J	Aloxe3
ENSMUSG00000023915	J	Tnfrsf21
ENSMUSG00000074622	J	Mafb
ENSMUSG00000032046	J	Abhd12
ENSMUSG00000030272	J	Camk1
ENSMUSG00000071324	J	Armc2
ENSMUSG00000036896	J	C1qc
ENSMUSG00000026566	J	Mpzl1
ENSMUSG00000052572	J	Dlg2
ENSMUSG00000025171	J	Ubtd1
ENSMUSG00000020376	J	Rnf130
ENSMUSG00000060733	J	Ipmk
ENSMUSG00000039497	J	Dse
ENSMUSG00000109680	J	Gm32098
ENSMUSG00000062373	J	Tmem65
ENSMUSG00000017466	J	Timp2
ENSMUSG00000030159	J	Clec1b
ENSMUSG00000069830	J	Nlrp1a
ENSMUSG00000114390	J	1700062C10Rik
ENSMUSG00000085882	J	2610507I01Rik
ENSMUSG00000031791	J	Tmem38a
ENSMUSG00000029373	J	Pf4
ENSMUSG00000000320	J	Alox12
ENSMUSG00000016255	J	Tubb1
ENSMUSG00000031584	J	Gsr
ENSMUSG00000002111	J	Spi1
ENSMUSG00000049988	J	Lrrc25
ENSMUSG00000005533	J	Igf1r
ENSMUSG00000000359	J	Rem1
ENSMUSG00000011463	J	Cpb1
ENSMUSG00000070360	J	Amy2a1
ENSMUSG00000074268	J	Amy2a5
ENSMUSG00000096569	J	Amy2a2
ENSMUSG00000096770	J	Amy2a4
ENSMUSG00000093931	J	Amy2a3
ENSMUSG00000005237	J	Dnah2
ENSMUSG00000039824	J	Myl6b
ENSMUSG00000031896	J	Ctrl
ENSMUSG00000041782	J	Lad1
ENSMUSG00000046794	J	Ppp1r3b
ENSMUSG00000092618	J	Btnl6
ENSMUSG00000055322	J	Tns1
ENSMUSG00000050022	J	Amz1
ENSMUSG00000025950	J	Idh1
ENSMUSG00000054115	J	Skp2
ENSMUSG00000058818	J	Pirb
ENSMUSG00000056220	J	Pla2g4a
ENSMUSG00000040537	J	Adam22
ENSMUSG00000022793	J	B4galt4
ENSMUSG00000020961	J	Ston2
ENSMUSG00000030339	J	Ltbr
ENSMUSG00000024985	J	Tcf7l2
ENSMUSG00000003518	J	Dusp3
ENSMUSG00000039270	J	Megf9
ENSMUSG00000087450	J	Gm13994
ENSMUSG00000022324	J	Matn2
ENSMUSG00000042684	J	Npl
ENSMUSG00000006411	J	Nectin4
ENSMUSG00000056515	J	Rab31
ENSMUSG00000037820	J	Tgm2
ENSMUSG00000043740	J	B430306N03Rik
ENSMUSG00000059498	J	Fcgr3
ENSMUSG00000024672	J	Ms4a7
ENSMUSG00000017969	J	Ptgis
ENSMUSG00000045502	J	Hcar2
ENSMUSG00000046245	J	Pilra
ENSMUSG00000066684	J	Pilrb1
ENSMUSG00000033192	J	Lpcat2
ENSMUSG00000023349	J	Clec4n
ENSMUSG00000021939	J	Ctsb
ENSMUSG00000005413	J	Hmox1
ENSMUSG00000034652	J	Cd300a
ENSMUSG00000020432	J	Tcn2
ENSMUSG00000066682	J	Pilrb2
ENSMUSG00000045664	J	Cdc42ep2
ENSMUSG00000066026	J	Dhrs3
ENSMUSG00000042770	J	Hebp1
ENSMUSG00000039217	J	Il18
ENSMUSG00000058135	J	Gstm1
ENSMUSG00000037966	J	Ninj1
ENSMUSG00000029059	J	Prxl2b
ENSMUSG00000028874	J	Fgr
ENSMUSG00000102418	J	Sh2d1b1
ENSMUSG00000116114	J	Gm35853
ENSMUSG00000023031	J	Cela1
ENSMUSG00000018774	J	Cd68
ENSMUSG00000029925	J	Tbxas1
ENSMUSG00000058715	J	Fcer1g
ENSMUSG00000030148	J	Clec4a2
ENSMUSG00000049037	J	Clec4a1
ENSMUSG00000044165	J	Bcl2l15
ENSMUSG00000109036	J	2210406H18Rik
ENSMUSG00000027399	J	Il1a
ENSMUSG00000041202	J	Pla2g2d
ENSMUSG00000033488	J	Cryzl2
ENSMUSG00000013089	J	Etv5
ENSMUSG00000028917	J	Plekhm2
ENSMUSG00000039166	J	Akap7
ENSMUSG00000009248	J	Ascl2
ENSMUSG00000038235	J	F11r
ENSMUSG00000023022	J	Lima1
ENSMUSG00000035004	J	Igsf6
ENSMUSG00000043017	J	Ptgir
ENSMUSG00000095788	J	Sirpb1a
ENSMUSG00000107355	J	AI839979
ENSMUSG00000074419	J	Pira13
ENSMUSG00000078780	J	Gm5150
ENSMUSG00000035493	J	Tgfbi
ENSMUSG00000033777	J	Tlr13
ENSMUSG00000017057	J	Il13ra1
ENSMUSG00000007837	J	Prrg2
ENSMUSG00000044092	J	C130050O18Rik
ENSMUSG00000074794	J	Arrdc3
ENSMUSG00000039109	J	F13a1
ENSMUSG00000028497	J	Hacd4
ENSMUSG00000030187	J	Klra2
ENSMUSG00000030786	J	Itgam
ENSMUSG00000074361	J	C5ar2
