# Supplementary material for: NR4A1 limits CD8⁺ T Cell effector responses and protection in tuberculosis
Source: Research Square preprint supplement (doi:10.21203/rs.3.rs-8363336/v1), 2026-01-13
Supplement: Supplementary file 3 [file 7020d917d087c181d2832520.xlsx]

## Sheet: scRNAseq cluster-m DEG Fig. 4e
gene_name	avg_log2FC	p_val_adj	gene_type
Ftl1-ps1	-2.36997	4.98e-90	down
Ifi204	-1.46522	6.09e-62	down
Nr4a1	-2.08889	9.48e-49	down
Ifi211	-0.918265	2.9e-32	down
Nkg7	0.822695	5.94e-32	up
Gdpd3	-1.173	2.99e-30	down
Gbp2b	-0.958986	6.55e-30	down
Trim16	-0.807611	1.87e-25	down
Klrk1	1.72265	3.28e-23	up
Wls	-1.39973	2.02e-20	down
Klre1	1.47508	1.06e-17	up
Iqgap1	0.802898	1.73e-16	up
Gvin1	0.949	2.05e-16	up
Ptp4a3	0.855879	3.48e-13	up
Lta4h	0.906385	3.8e-12	up
Chsy1	0.753846	7.33e-12	up
Itgax	1.22802	1.4e-11	up
Cxcr6	-1.17846	1.5e-11	down
Ide	0.849618	3.56e-11	up
Ccl5	0.489396	1.62e-10	up
Gzmb	0.783876	5.17e-10	up
Prkch	0.75475	3.07e-09	up
Spry2	1.29009	3.67e-09	up
St6galnac2	-0.262228	7.23e-09	down
Nfatc1	0.715437	1.53e-08	up
Hist1h3a	0.686726	4.41e-08	up
Cldnd2	0.729288	4.69e-08	up
Rap1b	0.383486	7.84e-08	up
Trbv2	-1.45012	1.19e-07	down
Cd244a	0.961359	1.21e-07	up
Klk13	-0.885949	1.39e-07	down
Cd28	-0.858382	6.93e-07	down
Lat2	0.7385	8.44e-07	up
Htatip2	0.598386	1.18e-06	up
Armc6	-0.385969	3.08e-06	down
Ifi203	-0.654056	4.23e-06	down
Scpep1	-0.442468	5.81e-06	down
Tcrg-C2	1.06841	6.38e-06	up
Klrb1f	0.874044	7.08e-06	up
Furin	-0.924706	7.16e-06	down
Klrd1	0.540773	7.38e-06	up
Poglut1	-0.361671	1.21e-05	down
Pycard	0.609984	1.29e-05	up
Gzma	0.726631	2.36e-05	up
Ms4a4b	-0.43031	2.8e-05	down
Hspa1a	-1.56876	4.63e-05	down
Sell	-0.969876	6.82e-05	down
Cmklr1	0.67657	6.88e-05	up
Lyz2	-0.872771	8.41e-05	down
Atrnl1	-0.396882	0.000134224	down
Prex1	0.477157	0.000228258	up
Lpin1	0.560573	0.000266085	up
Rack1	-0.421434	0.000278349	down
Klrb1c	0.529433	0.000311629	up
Pdhb	0.58115	0.000383954	up
Dnajb4	0.561286	0.000402796	up
Xdh	0.475092	0.000456175	up
Chil3	-0.502873	0.000581	down
Mfhas1	-0.576668	0.000694647	down
Ramac	0.566082	0.000737519	up
Ms4a6b	-0.46137	0.000805907	down
Mtus1	-0.179128	0.000862912	down
Snrpn	-0.441451	0.000925331	down
Trim12a	0.505392	0.00101431	up
Gpr174	-0.570965	0.00118411	down
Lysmd2	-0.4994	0.00148279	down
Trbv20	1.27297	0.00208904	up
Fam241a	0.492443	0.00257043	up
St6galnac3	0.403311	0.00313222	up
Acot7	-0.5112	0.00314017	down
Lgals3	0.524144	0.00328355	up
Cirbp	0.491579	0.00356473	up
Pfn1	-0.312892	0.00396759	down
Arntl2	-0.154209	0.00410039	down
Rac2	-0.202751	0.00422652	down
Selenon	0.517438	0.00559265	up
Cd37	0.457797	0.00566353	up
Ccng1	-0.564384	0.00585677	down
Rap1gap2	0.42965	0.00690126	up
Podnl1	-0.672155	0.00696864	down
Ifi206	0.591827	0.00739584	up
Sfxn3	0.470179	0.00781741	up
Arhgap31	0.401733	0.00960846	up
Dhdh	-0.268425	0.00973879	down
Ccdc88c	0.350082	0.0099966	up
Apobec3	0.541307	0.0116711	up
Ccr5	-0.567743	0.0132377	down
Srsf5	0.320631	0.0145466	up
Lrig1	-0.244903	0.0148478	down
Cd48	0.373643	0.0152112	up
Litaf	0.595089	0.0155651	up
Cpt1c	-0.160127	0.0194962	down
Fcgr2b	0.578949	0.0221649	up
Fth1	-0.455757	0.0231546	down
2011-09-01	0.452254	0.0255274	up
Rcn3	0.393253	0.0285926	up
Slamf6	-0.398896	0.0304367	down
Plcxd2	0.374353	0.0318994	up
Ovol2	-0.238017	0.0404852	down
Pdgfb	-0.478522	0.0440705	down

## Sheet: scRNAseq cluster-g DEG Fig. 4e
gene_name	avg_log2FC	p_val_adj	gene_type
Ftl1-ps1	-2.20564	5.34131e-171	down
Gbp2b	-2.26739	8.87653e-148	down
Ifi204	-1.36193	5.31078e-118	down
Nr4a1	-1.82481	1.88806e-73	down
Gdpd3	-1.62465	1.89298e-69	down
Nkg7	0.937557	3.21101e-53	up
Wls	-1.43106	3.98937e-52	down
Ifi211	-0.828523	7.68324e-51	down
Itgax	1.59475	3.04855e-40	up
Gvin1	0.901583	4.1704e-39	up
Apobec3	0.832936	3.63892e-26	up
Trim12a	0.730484	1.69334e-22	up
Htatip2	0.680862	3.5351e-22	up
Mgll	-0.450683	1.61669e-21	down
Klrk1	1.36595	2.18559e-21	up
Iqgap1	0.555187	3.60029e-19	up
Ccl5	0.589899	6.07701e-18	up
Hist1h3a	0.656143	1.14427e-17	up
Lyz2	-0.838674	3.96879e-17	down
Ptp4a3	0.733852	1.0394e-16	up
Snrpn	-0.356553	1.32785e-16	down
Ide	0.646605	4.15206e-16	up
Spry2	1.25908	4.53017e-16	up
Prkch	0.640283	2.32284e-15	up
Lta4h	0.632864	5.36925e-15	up
Scpep1	-0.656408	9.63595e-15	down
Zfp990	-0.213423	1.33393e-14	down
St6galnac2	-0.326158	5.73244e-14	down
Klre1	1.29015	1.15524e-13	up
Hspa1b	-1.43682	1.00273e-12	down
Lrrk1	0.587587	1.06138e-12	up
Il18r1	-0.575871	1.20335e-12	down
Vmp1	-0.714399	1.56196e-12	down
Trim16	-0.26538	1.60392e-12	down
Klrd1	0.728038	1.89038e-12	up
Chsy1	0.662892	2.07431e-12	up
Dnajb4	0.676537	2.65882e-12	up
Pdhb	0.626334	3.38601e-12	up
Trbv3	-1.40173	5.03012e-12	down
Satb1	-0.706591	5.88001e-12	down
Ifi206	0.599311	1.16378e-11	up
Sh3bgrl3	0.444793	4.24409e-11	up
Dennd3	-0.519625	2.71614e-10	down
Prelid2	-0.328103	2.82463e-10	down
Wdtc1	-0.572411	3.63292e-10	down
Furin	-0.739157	4.6142e-10	down
Litaf	0.558918	5.3122e-10	up
Crip1	0.636971	7.87033e-10	up
Dhdh	-0.24447	1.99846e-09	down
Chil3	-0.29007	2.16802e-09	down
Trbv29	1.35193	3.41674e-09	up
St6galnac3	0.448593	3.48267e-09	up
Bik	-0.557697	4.84259e-09	down
Gcnt1	-0.366533	5.87495e-09	down
Cln3	0.458488	1.53611e-08	up
Ramac	0.47465	2.83762e-08	up
Cbx7	0.51575	3.49983e-08	up
Arhgap31	0.407784	4.13497e-08	up
Slc1a5	0.422905	4.33301e-08	up
Cirbp	0.5515	4.70845e-08	up
Sfxn3	0.492296	5.51082e-08	up
Rgs10	0.447418	8.44123e-08	up
Gas7	0.565957	1.14983e-07	up
Arrdc4	-0.311368	1.18822e-07	down
Acadl	0.481685	1.25251e-07	up
Mtus1	-0.16962	1.92465e-07	down
Tcrg-C2	0.801087	3.00148e-07	up
Setbp1	-0.663814	3.1789e-07	down
Rab6b	0.396637	5.69904e-07	up
Ifi208	0.477165	6.05619e-07	up
Hspa8	-0.46241	8.83831e-07	down
Rcn3	0.372244	9.12972e-07	up
Rap1b	0.339051	1.86512e-06	up
Odc1	0.6248	1.90225e-06	up
Saraf	0.333926	1.94317e-06	up
Cldnd2	0.502925	2.70425e-06	up
Ahnak	0.380754	2.86163e-06	up
Pglyrp1	0.426377	4.98773e-06	up
Jun	-0.502863	8.585e-06	down
Snrpf	0.397805	1.04066e-05	up
Acss2	0.332286	1.06418e-05	up
Cisd2	0.441574	1.08061e-05	up
Hif1a	-0.646476	1.12641e-05	down
Hsph1	-0.669231	1.18095e-05	down
Lysmd2	-0.481388	1.66706e-05	down
Zfp36l2	0.550164	1.68881e-05	up
Cd48	0.410295	1.8524e-05	up
Ttc7	0.388639	2.00626e-05	up
Itgad	0.551381	2.32713e-05	up
Itgb1	0.574728	3.26309e-05	up
Gzma	1.55318	3.74374e-05	up
Cpt1c	-0.106009	3.87247e-05	down
Fth1	-0.343856	4.13005e-05	down
Hspa1a	-1.15496	4.55597e-05	down
Lsm4	0.406318	6.17966e-05	up
Lat2	0.422259	7.0686e-05	up
Egln3	-0.325103	9.23042e-05	down
Tent5c	-0.543762	9.3284e-05	down
Mpeg1	-0.162424	0.00010078	down
H2-Q6	-0.411846	0.000138795	down
Eomes	0.605753	0.000146469	up
Elk3	0.331708	0.000149456	up
Tgfbr2	0.310633	0.000165696	up
H2-K1	-0.229174	0.00016848	down
Stip1	-0.513431	0.000195082	down
Dynlrb1	0.361435	0.000251935	up
Tcrg-C4	0.397552	0.000260055	up
Mri1	0.367522	0.00030649	up
Cd74	-0.534288	0.000333985	down
Rora	-0.458253	0.000349252	down
Podnl1	-0.388087	0.000375449	down
B2m	-0.232966	0.000419537	down
Hlx	-0.492899	0.000423451	down
Ccng1	-0.418418	0.000467116	down
Trbv19	1.35483	0.000473899	up
Arl5a	0.301713	0.000553005	up
Tpm4	0.383892	0.000568766	up
Trbv2	-0.976059	0.000725867	down
Krt83	-0.358034	0.000893042	down
Trim5	0.267217	0.0010658	up
Tnfrsf25	-0.264039	0.00107814	down
Arntl2	-0.11838	0.00149066	down
Eps8l1	0.23527	0.00155214	up
Lgals3	0.692417	0.00173986	up
Tnf	-0.479267	0.00181541	down
Alkbh6	0.296487	0.00228281	up
Il2ra	-0.708884	0.00238375	down
Selenon	0.340677	0.00390868	up
Jund	-0.308882	0.00439327	down
Zmiz1	0.326442	0.00506669	up
Lilrb4a	-0.525261	0.00540757	down
Lpin1	0.583	0.00552829	up
Heatr9	0.326656	0.00571189	up
Gbp4	-0.689383	0.00634103	down
Ubash3b	0.362182	0.00637217	up
Clec2d	-0.466365	0.00654404	down
Trbv17	-1.5894	0.00671226	down
Pttg1	0.338283	0.00806609	up
Prkcz	0.328577	0.00918582	up
Rabggtb	-0.367711	0.0096946	down
Dusp5	0.356677	0.00993069	up
Lamp2	-0.441213	0.0104746	down
Mapk3	0.38401	0.0115706	up
Cyth4	0.297964	0.013307	up
Ifi203	-0.334977	0.0135425	down
Bcat2	0.295011	0.0138186	up
Calm3	0.308881	0.0139337	up
Gbp2	-0.463482	0.0158605	down
Kcnc1	0.244201	0.0172056	up
Use1	0.308534	0.0179237	up
Hjurp	0.279285	0.0184006	up
Ltb	-0.382472	0.0193532	down
Rrbp1	-0.392881	0.0201503	down
Ifi30	0.309195	0.0206434	up
Atp2a3	0.270555	0.0217147	up
Rack1	-0.254875	0.0218476	down
Tram1	0.281688	0.025588	up
Basp1	-0.104628	0.0275441	down
Emb	-0.376199	0.0285702	down
Pde5a	-0.142198	0.0288974	down
Dhx40	0.264036	0.0301716	up
Cnr2	-0.105297	0.0305475	down
Gzmb	0.152209	0.034081	up
Impdh1	0.32019	0.0352238	up
Lgals8	-0.447061	0.035251	down
Gbp3	-0.418342	0.0366747	down
Fbxo17	-0.158181	0.0370298	down
Flnb	0.189022	0.0384235	up
Spata6	0.271468	0.0396937	up
Xdh	0.401952	0.0404248	up
Pik3cg	0.324742	0.0450418	up
Arhgap15	0.214236	0.0471896	up
S100a6	0.477577	0.0489462	up
Baiap3	0.307148	0.0492065	up
