# Supplementary material for: NR4A1 limits CD8⁺ T Cell effector responses and protection in tuberculosis
Source: Research Square preprint supplement (doi:10.21203/rs.3.rs-8363336/v1), 2026-01-13
Supplement: Supplementary file 4 [file 9863e7935d9996980b9a2457.xlsx]

## Sheet: Fig 2b
GeneID	clusters	Symbol
ENSMUSG00000118064	1	Gm50210
ENSMUSG00000039745	1	Htatip2
ENSMUSG00000115681	1	Gm2682
ENSMUSG00000114390	1	1700062C10Rik
ENSMUSG00000108456	1	4732496C06Rik
ENSMUSG00000103998	1	Gm38025
ENSMUSG00000053886	1	Sh2d4a
ENSMUSG00000031974	1	Abcb10
ENSMUSG00000045639	1	Zfp629
ENSMUSG00000030782	1	Tgfb1i1
ENSMUSG00000085826	1	Gm15638
ENSMUSG00000118012	1	Gm46620
ENSMUSG00000022799	1	Arhgap31
ENSMUSG00000029149	1	Krtcap3
ENSMUSG00000110537	1	Gm4316
ENSMUSG00000097368	1	Gm10390
ENSMUSG00000043592	1	Unc5cl
ENSMUSG00000092368	1	A930015D03Rik
ENSMUSG00000073980	1	Gm9574
ENSMUSG00000111740	1	Gm49783
ENSMUSG00000038398	1	Upf3a
ENSMUSG00000086004	1	Gm7805
ENSMUSG00000117465	1	Gm49980
ENSMUSG00000097785	1	B230217O12Rik
ENSMUSG00000001918	1	Slc1a5
ENSMUSG00000031860	1	Pbx4
ENSMUSG00000043664	1	Tmem221
ENSMUSG00000076598	2	Igkv3-7
ENSMUSG00000094087	2	Ighv1-61
ENSMUSG00000050982	2	Apol10a
ENSMUSG00000076666	2	Ighv14-4
ENSMUSG00000045087	2	S1pr5
ENSMUSG00000094094	2	Igkv5-45
ENSMUSG00000076633	2	Ighv5-2
ENSMUSG00000095285	2	Ighv5-9
ENSMUSG00000095442	2	Ighv1-4
ENSMUSG00000076674	2	Ighv3-8
ENSMUSG00000076586	2	Igkv8-21
ENSMUSG00000096336	2	Igkv1-135
ENSMUSG00000095429	2	Ighv5-12
ENSMUSG00000076562	2	Igkv4-50
ENSMUSG00000076940	2	Iglv2
ENSMUSG00000096844	2	Igkv6-14
ENSMUSG00000076536	2	Igkv4-86
ENSMUSG00000076508	2	Igkv17-127
ENSMUSG00000094433	2	Igkv5-43
ENSMUSG00000094420	2	Igkv10-96
ENSMUSG00000094797	2	Igkv6-15
ENSMUSG00000076514	2	Igkv17-121
ENSMUSG00000096632	2	Igkv9-124
ENSMUSG00000076937	2	Iglc2
ENSMUSG00000105547	2	Iglc3
ENSMUSG00000076533	2	Igkv4-90
ENSMUSG00000095519	2	Ighv1-66
ENSMUSG00000076934	2	Iglv1
ENSMUSG00000105906	2	Iglc1
ENSMUSG00000026815	2	Gfi1b
ENSMUSG00000029866	2	Kel
ENSMUSG00000023926	2	Rhag
ENSMUSG00000028332	2	Hemgn
ENSMUSG00000028825	2	Rhd
ENSMUSG00000004655	2	Aqp1
ENSMUSG00000027562	2	Car2
ENSMUSG00000022099	2	Dmtn
ENSMUSG00000037872	2	Ackr1
ENSMUSG00000082101	2	Slfn14
ENSMUSG00000073400	2	Trim10
ENSMUSG00000042066	2	Tmcc2
ENSMUSG00000026532	2	Spta1
ENSMUSG00000045629	2	Sh3tc2
ENSMUSG00000021118	2	Plek2
ENSMUSG00000031170	2	Slc38a5
ENSMUSG00000034059	2	Ypel4
ENSMUSG00000056656	2	Apol8
ENSMUSG00000031877	2	Ces2g
ENSMUSG00000025495	2	Ptdss2
ENSMUSG00000023995	2	Tspo2
ENSMUSG00000041842	2	Fhdc1
ENSMUSG00000054135	2	A430110L20Rik
ENSMUSG00000025584	2	Pde8a
ENSMUSG00000029657	2	Hsph1
ENSMUSG00000100801	2	Gm15459
ENSMUSG00000103953	2	Gm29718
ENSMUSG00000032115	2	Hyou1
ENSMUSG00000050157	2	Gm867
ENSMUSG00000120351	2	Gm57337
ENSMUSG00000061878	2	Sphk1
ENSMUSG00000027075	2	Slc43a1
ENSMUSG00000029752	2	Asns
ENSMUSG00000028532	2	Cachd1
ENSMUSG00000032126	2	Hmbs
ENSMUSG00000041329	2	Atp1b2
ENSMUSG00000027556	2	Car1
ENSMUSG00000081078	3	Gm12568
ENSMUSG00000117575	3	Gm36486
ENSMUSG00000114213	3	A430090L17Rik
ENSMUSG00000102881	3	Gm3807
ENSMUSG00000035764	3	Fbxo45
ENSMUSG00000059674	3	Cdh24
ENSMUSG00000117634	3	Gm50069
ENSMUSG00000037982	3	Gm9725
ENSMUSG00000087128	3	Gm12655
ENSMUSG00000085133	3	B930095G15Rik
ENSMUSG00000102211	3	Gm37490
ENSMUSG00000029016	3	Clcn6
ENSMUSG00000028528	3	Dnajc6
ENSMUSG00000089827	3	1700023H06Rik
ENSMUSG00000040102	3	Klhl42
ENSMUSG00000082145	3	Gm12312
ENSMUSG00000040187	3	Arntl2
ENSMUSG00000028601	3	Echdc2
ENSMUSG00000020475	3	Pgam2
ENSMUSG00000072294	3	Klf12
ENSMUSG00000110866	3	Gm48362
ENSMUSG00000033955	3	Tnks1bp1
ENSMUSG00000002012	3	Pnck
ENSMUSG00000104213	3	Ighd
ENSMUSG00000106567	3	2010309G21Rik
ENSMUSG00000112621	3	Gm5173
ENSMUSG00000029167	3	Ppargc1a
ENSMUSG00000026311	3	Asb1
ENSMUSG00000022100	3	Xpo7
ENSMUSG00000037124	3	Trim58
ENSMUSG00000032411	3	Tfdp2
ENSMUSG00000024588	3	Fech
ENSMUSG00000038871	3	Bpgm
ENSMUSG00000004552	3	Ctse
ENSMUSG00000034248	3	Slc25a37
ENSMUSG00000022816	3	Fstl1
ENSMUSG00000049115	3	Agtr1a
ENSMUSG00000025175	3	Fn3k
ENSMUSG00000043243	3	Niban3
ENSMUSG00000094497	3	Gm8210
ENSMUSG00000083833	3	Gm13841
ENSMUSG00000050550	3	Gm11868
ENSMUSG00000033808	3	Tmem87a
ENSMUSG00000105263	3	Gm42427
ENSMUSG00000072476	3	Gm9008
ENSMUSG00000020990	3	Cdkl1
ENSMUSG00000021713	3	Ppwd1
ENSMUSG00000081497	3	Gm15560
ENSMUSG00000038236	4	Hoxa7
ENSMUSG00000035186	4	Ubd
ENSMUSG00000024679	4	Ms4a6d
ENSMUSG00000026208	4	Des
ENSMUSG00000062382	4	Ftl1-ps1
ENSMUSG00000034039	4	Prss29
ENSMUSG00000096755	4	Ftl1-ps2
ENSMUSG00002075680	4	Gm55531
ENSMUSG00002074878	4	Gm55175
ENSMUSG00000011382	4	Dhdh
ENSMUSG00000082062	4	Ftl2-ps
ENSMUSG00000119232	4	Mir692-2
ENSMUSG00000058542	4	Gm15590
ENSMUSG00000081251	4	Gm12164
ENSMUSG00000009588	4	St6galnac1
ENSMUSG00000056032	4	BC018473
ENSMUSG00000078586	4	Gm11735
ENSMUSG00000066362	4	Rps13-ps1
ENSMUSG00000030523	4	Trpm1
ENSMUSG00000034783	4	Cd207
ENSMUSG00000022836	5	Mylk
ENSMUSG00000024511	5	Rab27b
ENSMUSG00000018102	5	H2bc4
ENSMUSG00000031497	5	Tnfsf13b
ENSMUSG00000027533	5	Fabp5
ENSMUSG00000025092	5	Hspa12a
ENSMUSG00000044103	5	Il36g
ENSMUSG00000005800	5	Mmp8
ENSMUSG00000026073	5	Il1r2
ENSMUSG00000022651	5	Retnlg
ENSMUSG00000108291	5	Gm44292
ENSMUSG00000046908	5	Ltb4r1
ENSMUSG00000052212	5	Cd177
ENSMUSG00000121186	5	Gm39792
ENSMUSG00000012428	5	Steap4
ENSMUSG00000041754	5	Trem3
ENSMUSG00000027398	5	Il1b
ENSMUSG00000115946	5	Mirt2
ENSMUSG00000056071	5	S100a9
ENSMUSG00000025491	5	Ifitm1
ENSMUSG00000027360	5	Hdc
ENSMUSG00000026981	5	Il1rn
ENSMUSG00000030144	5	Clec4d
ENSMUSG00000031722	5	Hp
ENSMUSG00000037095	5	Lrg1
ENSMUSG00000025330	5	Padi4
ENSMUSG00000017737	5	Mmp9
ENSMUSG00000000204	5	Slfn4
ENSMUSG00000078817	5	Nlrp12
ENSMUSG00000027737	5	Slc7a11
ENSMUSG00000052749	5	Trim30b
ENSMUSG00000026893	5	Gca
ENSMUSG00000030341	5	Tnfrsf1a
ENSMUSG00000050931	5	Sgms2
ENSMUSG00000117485	5	Gm19696
ENSMUSG00000018927	5	Ccl6
ENSMUSG00000025351	5	Cd63
ENSMUSG00000027072	5	Prg3
ENSMUSG00000036067	5	Slc2a6
ENSMUSG00000021125	5	Arg2
ENSMUSG00000021360	5	Gcnt2
ENSMUSG00000049130	5	C5ar1
ENSMUSG00000114554	5	5430425K12Rik
ENSMUSG00000026180	5	Cxcr2
ENSMUSG00000025804	5	Ccr1
ENSMUSG00000013974	5	Mcemp1
ENSMUSG00000031377	5	Bmx
ENSMUSG00000079293	5	Clec7a
ENSMUSG00000090307	5	1700071M16Rik
ENSMUSG00000028859	5	Csf3r
ENSMUSG00000047798	5	Cd300lf
ENSMUSG00000063193	5	Cd300lb
ENSMUSG00000004609	5	Cd33
ENSMUSG00000045636	5	Mtus1
ENSMUSG00000009633	5	G0s2
ENSMUSG00000035783	5	Acta2
ENSMUSG00000024451	5	Arap3
ENSMUSG00000030747	5	Dgat2
ENSMUSG00000090192	5	Gm16556
ENSMUSG00000043939	5	A530064D06Rik
ENSMUSG00000034641	5	Cd300ld
ENSMUSG00000074677	5	Sirpb1c
ENSMUSG00000021069	5	Pygl
ENSMUSG00000058099	5	Nfam1
ENSMUSG00000051397	5	Tacstd2
ENSMUSG00000033720	5	Sfxn5
ENSMUSG00000060591	5	Ifitm2
ENSMUSG00000024011	5	Pi16
ENSMUSG00000033508	5	Asprv1
ENSMUSG00000092618	5	Btnl6
ENSMUSG00000073412	5	Lst1
ENSMUSG00000074063	5	Osgin1
ENSMUSG00000038811	5	Gngt2
ENSMUSG00000005237	5	Dnah2
ENSMUSG00000023913	5	Pla2g7
ENSMUSG00000022788	5	Fgd4
ENSMUSG00000078780	5	Gm5150
ENSMUSG00000035004	5	Igsf6
ENSMUSG00000020604	5	Arsg
ENSMUSG00000033768	5	Nrxn2
ENSMUSG00000051439	5	Cd14
ENSMUSG00000017002	5	Slpi
ENSMUSG00000025492	5	Ifitm3
ENSMUSG00000074361	5	C5ar2
ENSMUSG00000030579	5	Tyrobp
ENSMUSG00000059498	5	Fcgr3
ENSMUSG00000101585	5	1600010M07Rik
ENSMUSG00000095028	5	Sirpb1b
ENSMUSG00000078122	5	F630028O10Rik
ENSMUSG00000005087	5	Cd44
ENSMUSG00000095788	5	Sirpb1a
ENSMUSG00000120077	5	Gm41659
ENSMUSG00000054855	5	Rnd1
ENSMUSG00000107355	5	AI839979
ENSMUSG00000046794	5	Ppp1r3b
ENSMUSG00000053553	5	3110082I17Rik
ENSMUSG00000028871	5	Rspo1
ENSMUSG00000021477	5	Ctsl
ENSMUSG00000074417	5	Pira12
ENSMUSG00000074419	5	Pira13
ENSMUSG00000030427	5	Lilra6
ENSMUSG00000048078	5	Tenm4
ENSMUSG00000059108	5	Ifitm6
ENSMUSG00000042265	5	Trem1
ENSMUSG00000056529	5	Ptafr
ENSMUSG00000022534	5	Mefv
ENSMUSG00000008540	5	Mgst1
ENSMUSG00000064254	5	Ethe1
ENSMUSG00000120878	5	Gm56663
ENSMUSG00000045763	5	Basp1
ENSMUSG00000026153	5	Fam135a
ENSMUSG00000039286	5	Fndc3b
ENSMUSG00000059089	5	Fcgr4
ENSMUSG00000004814	5	Ccl24
ENSMUSG00000068758	5	Il3ra
ENSMUSG00000042807	5	Hecw2
ENSMUSG00000070323	5	Mmp27
ENSMUSG00000095609	5	Gm21188
ENSMUSG00000114608	5	Gm36161
ENSMUSG00000030147	5	Clec4b1
ENSMUSG00000044811	5	Cd300c2
ENSMUSG00000045551	5	Fpr1
ENSMUSG00000015854	5	Cd5l
ENSMUSG00000041695	5	Kcnj2
ENSMUSG00000034714	5	Ttyh2
ENSMUSG00000041202	5	Pla2g2d
ENSMUSG00000026986	5	Hnmt
ENSMUSG00000020961	5	Ston2
ENSMUSG00000120309	5	Gm56745
ENSMUSG00000055546	5	Timd4
ENSMUSG00000036606	5	Plxnb2
ENSMUSG00000022235	5	Cmbl
ENSMUSG00000015354	5	Pcolce2
ENSMUSG00000026938	5	Fcna
ENSMUSG00000041707	5	Tmem273
ENSMUSG00000020053	5	Igf1
ENSMUSG00000015947	5	Fcgr1
ENSMUSG00000036905	5	C1qb
ENSMUSG00000066684	5	Pilrb1
ENSMUSG00000046245	5	Pilra
ENSMUSG00000034652	5	Cd300a
ENSMUSG00000043832	5	Clec4a3
ENSMUSG00000066682	5	Pilrb2
ENSMUSG00000102418	5	Sh2d1b1
ENSMUSG00000058715	5	Fcer1g
ENSMUSG00000024672	5	Ms4a7
ENSMUSG00000030148	5	Clec4a2
ENSMUSG00000029059	5	Prxl2b
ENSMUSG00000005413	5	Hmox1
ENSMUSG00000004359	5	Spic
ENSMUSG00000000440	5	Pparg
ENSMUSG00000023349	5	Clec4n
ENSMUSG00000042684	5	Npl
ENSMUSG00000038235	5	F11r
ENSMUSG00000019647	5	Sema6a
ENSMUSG00000028736	5	Pax7
ENSMUSG00000001946	5	Esam
ENSMUSG00000048264	5	Dip2c
ENSMUSG00000064039	5	Ccr1l1
ENSMUSG00000041782	5	Lad1
ENSMUSG00000023473	5	Celsr3
ENSMUSG00000027656	5	Ccn5
ENSMUSG00000066755	5	Tnfsf18
ENSMUSG00000026442	5	Nfasc
ENSMUSG00000035954	5	Dock4
ENSMUSG00000020010	5	Vnn3
ENSMUSG00000041268	5	Dmxl2
ENSMUSG00000029361	5	Nos1
ENSMUSG00000005803	5	Sqor
ENSMUSG00000061751	6	Kalrn
ENSMUSG00000087666	6	Trav13-5
ENSMUSG00000039545	6	Flicr
ENSMUSG00000052727	6	Map1b
ENSMUSG00000094974	6	Rps19-ps2
ENSMUSG00000096681	6	Rps19-ps1
ENSMUSG00000097081	6	Gm10425
ENSMUSG00000023979	6	Guca1b
ENSMUSG00000108353	6	Gm45205
ENSMUSG00000000365	6	Rnf17
ENSMUSG00000120038	6	Gm36462
ENSMUSG00000006345	6	Ggt1
ENSMUSG00000074868	6	Gm6478
ENSMUSG00000021823	6	Vcl
ENSMUSG00000025064	6	Col17a1
ENSMUSG00000048878	6	Hexim1
ENSMUSG00000046223	6	Plaur
ENSMUSG00000014543	6	Klra17
ENSMUSG00000116957	6	Gm34680
ENSMUSG00000063234	6	Gpr84
ENSMUSG00000075705	6	Msrb1
ENSMUSG00000036181	6	H1f2
ENSMUSG00000022026	6	Olfm4
ENSMUSG00000022582	6	Ly6g
ENSMUSG00000064246	6	Chil1
ENSMUSG00000093973	6	Mrgpra2a
ENSMUSG00000040907	6	Atp1a3
ENSMUSG00000069516	6	Lyz2
ENSMUSG00000003541	6	Ier3
ENSMUSG00000052435	6	Cebpe
ENSMUSG00000030589	6	Rasgrp4
ENSMUSG00000067235	6	H2-Q10
ENSMUSG00000050989	6	Selenon
ENSMUSG00000121227	6	Gm56918
ENSMUSG00000056643	6	Chst13
ENSMUSG00000079597	6	Cstdc4
ENSMUSG00000106609	6	Gm43181
ENSMUSG00000024053	6	Emilin2
ENSMUSG00000029915	6	Clec5a
ENSMUSG00000051490	6	Foxd4
ENSMUSG00000025161	6	Slc16a3
ENSMUSG00000030340	6	Scnn1a
ENSMUSG00000031825	6	Crispld2
ENSMUSG00000059657	6	Stfa2l1
ENSMUSG00000117315	6	1600022D10Rik
ENSMUSG00000086564	6	Cd101
ENSMUSG00000056054	6	S100a8
ENSMUSG00000024190	6	Dusp1
ENSMUSG00000001156	6	Mxd1
ENSMUSG00000069792	6	Wfdc17
ENSMUSG00000084807	6	Gm13073
ENSMUSG00000058427	6	Cxcl2
ENSMUSG00000058755	6	Osm
ENSMUSG00000043953	6	Ccrl2
ENSMUSG00000087644	6	Gm14703
ENSMUSG00000020037	6	Rfx4
ENSMUSG00000037451	6	Slc22a20
ENSMUSG00000070305	6	Mpzl3
ENSMUSG00000035863	6	Palm
ENSMUSG00000116380	6	Gm39556
ENSMUSG00000003153	6	Slc2a3
ENSMUSG00000027907	6	S100a11
ENSMUSG00000042417	6	Ccno
ENSMUSG00000029135	6	Fosl2
ENSMUSG00000061815	6	Rufy4
ENSMUSG00000102975	6	Gm37347
ENSMUSG00000024659	6	Anxa1
ENSMUSG00000069873	6	4930438A08Rik
ENSMUSG00000032496	6	Ltf
ENSMUSG00000038357	6	Camp
ENSMUSG00000040809	6	Chil3
ENSMUSG00000032484	6	Ngp
ENSMUSG00000030342	6	Cd9
ENSMUSG00000015950	6	Ncf1
ENSMUSG00000030142	6	Clec4e
ENSMUSG00000031641	6	Cbr4
ENSMUSG00000042213	6	Zfand4
ENSMUSG00000001025	6	S100a6
ENSMUSG00000005824	6	Tnfsf14
ENSMUSG00000000157	6	Itgb2l
ENSMUSG00000022126	6	Acod1
ENSMUSG00000030413	6	Pglyrp1
ENSMUSG00000067297	6	Ifit1bl2
ENSMUSG00000021594	6	Srd5a1
ENSMUSG00000112023	6	Lilrb4b
ENSMUSG00000112148	6	Lilrb4a
ENSMUSG00000027864	7	Ptgfrn
ENSMUSG00000113136	7	Gm19951
ENSMUSG00000097164	7	Cep83os
ENSMUSG00000086158	7	Pierce2
ENSMUSG00000086763	7	Plxna4os1
ENSMUSG00000025876	7	Unc5a
ENSMUSG00000090439	7	Gm17455
ENSMUSG00000038508	7	Gdf15
ENSMUSG00000045106	7	Ccdc73
ENSMUSG00000072066	7	6720489N17Rik
ENSMUSG00000068245	7	Phf11d
ENSMUSG00000029816	7	Gpnmb
ENSMUSG00000093955	7	Ighv1-34
ENSMUSG00000057596	7	Trim30d
ENSMUSG00000120140	7	Gm57204
ENSMUSG00000070737	7	Tmem35b
ENSMUSG00000029005	7	Draxin
ENSMUSG00000028557	7	Rnf11
ENSMUSG00000023092	7	Fhl1
ENSMUSG00000029372	7	Ppbp
ENSMUSG00000067577	7	A430093F15Rik
ENSMUSG00000040298	7	Btbd16
ENSMUSG00000015981	7	Stk32c
ENSMUSG00000035148	7	Gpr33
ENSMUSG00000022768	7	Ccdc116
ENSMUSG00000116220	7	A430088P11Rik
ENSMUSG00000029163	7	Emilin1
ENSMUSG00000021250	7	Fos
ENSMUSG00000029102	7	Hgfac
ENSMUSG00000086083	7	Gm15829
ENSMUSG00000020439	7	Smtn
ENSMUSG00000054672	7	Scart2
ENSMUSG00000023045	7	Soat2
ENSMUSG00000021675	7	F2rl2
ENSMUSG00000028943	7	Espn
ENSMUSG00000043456	7	Zfp536
ENSMUSG00000023078	7	Cxcl13
ENSMUSG00000027313	7	Chac1
ENSMUSG00000019312	7	Grb7
ENSMUSG00000022586	7	Ly6i
ENSMUSG00000020407	7	Upp1
ENSMUSG00000121499	7	Ly6a2
ENSMUSG00000044258	7	Ctla2a
ENSMUSG00000050445	7	Cyp8b1
ENSMUSG00000097113	7	Gm19705
ENSMUSG00000074170	7	Plekhf1
ENSMUSG00000054206	7	Gzmm
