# Supplementary material for: NR4A1 limits CD8⁺ T Cell effector responses and protection in tuberculosis
Source: Research Square preprint supplement (doi:10.21203/rs.3.rs-8363336/v1), 2026-01-13
Supplement: Supplementary file 5 [file eecbcf8564fbfdebb97baa49.xlsx]

## Sheet: Sheet1
CHIP-PCR primers
Site ID	Genomic region (relative to TSS)	Description	Amplicon size (bp)	Forward primer (5′→3′)	Reverse primer (5′→3′)
Site 1	–180 to –60	Best proximal candidate (2 mismatches to consensus AAAGGTCA)	~74	GTCTAGAAATGGACGTTAGG	ATTGTCTGGAGCATAGGTGG
Site 2	–380 to –260	Mid promoter site	~100	TGCTTGCTAGCTGCTTCTCT	GTCATCTGTGTCTTTGTCCC
Site 3 (Negative control)	–600 to –470	Distal site, reverse orientation (negative control)	~88	ACCACAGGAAAGTGTGACAC	TGGGAGGTGGGCTAATCATA
qPCR primers		Forward primer (5′→3′)	Reverse primer (5′→3′)
Nr4a1	25nmol	GTGTTGATGTTCCCGCCTTT	CGATTCTGCAGCTCTTCCAC
Nr4a2	25nmol	TTCTGTAGACCCCTAGCCCT	GGAGCCAAAATGCCCTTTCA
Nr4a3	25nmol	GCCGAAACCGATGTCAGTAC	TTTGGTTTGGAAGGCAGACG
NKG7	25nmol	ACAGGTCCTCACTTCTCTGC	GCAAGACAGAACCAGGAAGC
b- actin	25nmol	GTGGGAATGGGTCAGAAGGA	CTTCTCCATGTCGTCCCAGT
